# Supplementary material for: Knowledge, attitude and self-efficacy of elderly caregivers in Chinese nursing homes: a cross-sectional study in Liaoning Province
Source: PubMed Central journal article supplement — BMJ Open. 2019 Nov 12;9(11):e029869. doi: 10.1136/bmjopen-2019-029869 (PMC6858227; doi:10.1136/bmjopen-2019-029869), 2019-11-12
Supplement: bmjopen-2019-029869.draft_revisions.pdf [file bmjopen-2019-029869.draft_revisions.pdf]

# BMJ Open

BMJ Open is committed to open peer review. As part of this commitment we make the peer review history of every article we publish publicly available.

When an article is published we post the peer reviewers' comments and the authors' responses online. We also post the versions of the paper that were used during peer review. These are the versions that the peer review comments apply to.

The versions of the paper that follow are the versions that were submitted during the peer review process. They are not the versions of record or the final published versions. They should not be cited or distributed as the published version of this manuscript.

BMJ Open is an open access journal and the full, final, typeset and author-corrected version of record of the manuscript is available on our site with no access controls, subscription charges or pay-per-view fees (<http://bmjopen.bmj.com>).

If you have any questions on BMJ Open's open peer review process please email [info.bmjopen@bmj.com](mailto:info.bmjopen@bmj.com)

# BMJ Open

## Knowledge, attitude and self-efficacy of elderly caregivers in Chinese nursing homes: a cross-sectional study in Liaoning province

|                               |                                                                                                                                                                   |
|-------------------------------|-------------------------------------------------------------------------------------------------------------------------------------------------------------------|
| Journal:                      | <i>BMJ Open</i>                                                                                                                                                   |
| Manuscript ID                 | bmjopen-2019-029869                                                                                                                                               |
| Article Type:                 | Research                                                                                                                                                          |
| Date Submitted by the Author: | 19-Feb-2019                                                                                                                                                       |
| Complete List of Authors:     | Zhang, Huijun; Tianjin University, School of Pharmaceutical Science and Technology; Jinzhou Medical University, School of Nursing<br>Sun, He; Tianjin University, |
| Keywords:                     | knowledge, attitude, self-efficacy, elderly caregivers, nursing homes, China                                                                                      |
|                               |                                                                                                                                                                   |

SCHOLARONE™  
Manuscripts

1  
2  
3 **Knowledge, attitude and self-efficacy of elderly caregivers in Chinese nursing**  
4 **homes: a cross-sectional study in Liaoning province**  
5  
6  
7

8  
9 **Huijun Zhang**

10  
11 Affiliated institution: 1, School of Pharmaceutical Science and Technology, Tianjin  
12  
13 University, Tianjin, China; 2, School of Nursing, Jinzhou Medical University, Jinzhou,  
14  
15 Liaoning province, China  
16  
17

18  
19 E-mail: [13904069606@163.com](mailto:13904069606@163.com)  
20  
21

22  
23  
24  
25 **He Sun ( Corresponding author )**

26  
27 Affiliated institution: School of Pharmaceutical Science and Technology, Tianjin  
28  
29 University, Tianjin, China  
30  
31

32  
33 E-mail: [18768429445@163.com](mailto:18768429445@163.com)  
34  
35  
36  
37  
38  
39  
40  
41  
42  
43  
44  
45  
46  
47  
48  
49  
50  
51  
52  
53  
54  
55  
56  
57  
58  
59  
60

## Abstract

**Objectives** The purpose of this study is to assess the knowledge, attitude and self-efficacy of elderly caregivers in nursing homes and identify demographic characteristics and work environment factors influencing these attributes.

**Setting** A cross-sectional questionnaire survey was conducted on twelve nursing homes in Liaoning province, China.

**Participants** A total of 403 caregivers from 12 nursing homes were surveyed.

**Outcome measures** A Self-administered questionnaire composed of the Palmore's Facts on Aging Quiz I, the Kogan's Attitude Old People Scale, Generalized Self-efficacy Scale and background characteristics of participants was used for data collection. An average score for knowledge, attitude and self-efficacy was calculated. In addition, these scores were tested the differences across the different groups with adaptation of Student's t-tests and analysis of variance. Multivariate linear regression models were established to estimate the associated factors.

**Results** The participating caregivers reported an average rating score of  $10.42 \pm 2.79$ ,  $127.85 \pm 14.36$ , and  $27.12 \pm 4.9$  for knowledge, attitude and self-efficacy, respectively. Multivariate regression analysis showed respondents with high-level educational level ( $\beta=0.232$ ,  $p=0.018$ ), receiving pro-job training ( $\beta=0.196$ ,  $p<0.05$ ) and high job satisfaction ( $\beta=0.358-0.370$ ,  $p<0.01$ ) gave a positive rating on knowledge. The gender ( $\beta=-0.112$ ,  $p=0.026$ ) and work experience ( $\beta=-0.130$ ,  $p<0.05$ ) had negative associations with attitude toward the old. A positive association appeared for those employed as establishment staff ( $\beta=0.136$ ,  $p=0.012$ ), with high income ( $\beta=0.214$ ,  $p<0.001$ ) and an interest in working with the elderly ( $\beta=0.191$ ,  $p<0.05$ ). Regarding self-efficacy, factors included age ( $\beta=0.205$ ,  $p=0.002$ ), pro-job training ( $\beta=0.165$ ,  $p=0.002$ ), interest in working with old adults

( $\beta=0.154, p=0.013$ ), job satisfaction ( $\beta=0.174, p<0.05$ ) and health status of the old ( $\beta=0.290-0.447$   
 $p\leq 0.001$ ).

### **Conclusion**

Identified associated factors varied across knowledge, attitude and self-efficacy of elderly caregivers in Chinese nursing homes. Some efforts related to improving continuing education and income for caregivers should be given priority.

### **Strengths and limitations of this study**

- This study is among the first to understand perception of caregivers in Chinese nursing homes on knowledge about aging, attitude toward the old and self-efficacy.
- Multivariate linear regression models were established, identifying multi-faceted factors associated with caregivers-perceived knowledge, attitude and self-efficacy.
- Using widely accepted scales (FAQ 1, KAOP and GSE) for data collection made results of present study more reliable.
- The samples of this study were collected from only one province located in the northeastern region of China. Caution needs to be taken when generalizing the findings to other regions of China.

## Introduction

The phenomenon of the ageing population is highlighted around the world, especially in China.

According to the National Bureau of Statistics of China (2017), the elderly population aged 60 and over has reached 240 million, accounting for 17.3% of the total population<sup>1 2</sup>. By 2050, the number of people aged 60 years and older in China is expected to reach 450 million, accounting for 33% of its total population<sup>3</sup>. China will become the country with the largest number of elderly people in the world. With the acceleration of aging, needs for long-term care have increased dramatically.

Influenced by Chinese traditional culture, elderly people prefer to live with their children, and taking care of the elderly is regarded as the responsibility of the family<sup>4</sup>. However, increasing migration from rural to urban areas, especially among young people, and the shrinking average family size due to China's one-child policy have changed mainstream informal family-based caregiving model for older adults<sup>5 6</sup>. Consequently, demands for nursing homes (NHs) has increased dramatically.

In order to cope with the demands for aged care, the State Council of China issued guidelines on accelerating the development of the aged care service industry in 2013 to support the development of NHs. To date, there are 155,000 different type of NHs across Mainland China including old age homes, retirement departments, residential care facilities, welfare institutes, and geriatric hospitals.

However, workforce in NHs are poorly developed and under-prepared<sup>3</sup>. In addition, most health

1  
2  
3  
4 workers working in Chinese NHs received little training in nursing and caregiving skills, thus  
5  
6 resulting in quality of health care provided for the elderly is not guaranteed<sup>7 8</sup>. Although Chinese  
7  
8 government launched "Basic Standards for Service Quality of Aged Agencies" in 2017, quality of  
9  
10 health care in NHs still varied a lot<sup>9</sup>. Providing appropriate health care for old adults in NHs has  
11  
12 become a great challenge for development of the aged care in China.  
13  
14

15  
16 Elderly caregivers in NHs, as the front-line health care workers, spend much time with the old  
17  
18 people and have a direct effect on health care delivery<sup>10</sup>. Previous studies suggested that knowledge,  
19  
20 attitude of caregivers about the elderly and their self-efficacy were associated with quality of health  
21  
22 care<sup>11-13</sup>. Negative attitude toward older people, a lack of knowledge about the elderly and low-level  
23  
24 self-efficacy created an adverse impact on provision of health care behavior and ultimately lead to  
25  
26 bad health outcomes<sup>14-16</sup>. Therefore, improving knowledge, attitude and self-efficacy of caregivers  
27  
28 is widely recognized as beneficial attempts for providing high-quality aged care services.  
29  
30  
31  
32  
33

34  
35 Many studies conducted in western countries revealed social workers, health care workers and  
36  
37 nursing students had a bad attitude, misconception, inadequate knowledge and lowest priority to  
38  
39 consider working with the older<sup>17-19</sup>. However, there is paucity in the literature involved in low- and  
40  
41 middle-income Asian countries, including China. Furthermore, there are great practical significance  
42  
43 to understand knowledge, attitude and self-efficacy of elderly caregivers in NHs with a sharp  
44  
45 increase in demand for aged care in China.  
46  
47  
48  
49

50  
51 The aim of this study is to investigate the perceptions of caregivers on knowledge about aging,  
52  
53 attitude toward the elderly and self-efficacy and identify their associated factors using sample of  
54  
55 Liaoning province.  
56  
57  
58  
59  
60

## Method

### Setting and sampling

A cross-sectional quantitative survey was conducted on Liaoning province located in the northeastern region of China with the population over 60 years old accounts for 22.65% of the total population<sup>20</sup>.

We adopted a multistage sampling strategy. Firstly, three cities were selected from three different geographical zones: Shenyang representing central, Jinzhou representing western and Dandong representing eastern. Then, four NHs (two for large size, two for small size) were selected in each city. Due to the different size in selected NHs, we planned to sample about 30 caregivers for small one and 50 caregivers for large one.

Data were collected over the period from November 1, 2015 to May 31, 2016. Two to four trained investigators assigned to each selected nursing home were required to invite caregivers working in different departments. The participants were asked to read the informed consent letter and gave oral consent before they filled out the questionnaires. We approached potential participants across the entire working time to maximize the chance of capturing a representative sample.

Due to fact there is no standardized definition for NHs in Mainland China, nursing homes in this study were included in residential long-term care facilities in Mainland China that mainly admit people who are 60 years and older. The caregivers who provided direct care for the elderly were eligible to participate in this study. Participants have worked in the selected NHs for more than one year and they are voluntarily participated in the survey.

Ultimately, about 800 caregivers were invited to participate this investigation, and 480 participants (60.0%) were volunteer to filled in and returned the questionnaire. After excluding questionnaires



1  
2  
3  
4 with uncompleted key item, 403 (83.9%) left were valid for the data analysis. This sample size  
5  
6 would be large enough for us to perform multivariate linear regression analyses for a model  
7  
8  
9 containing 18 dichotomous independent variables (table 1).  
10

## 11 **Measurement**

12  
13  
14 We adopted Palmore's Facts on Aging Quiz I (FAQ I), the Kogan's Attitude Old People Scale  
15  
16 (KAOP) and Generalized Self-efficacy Scale (GSE) to measure knowledge, attitude toward the  
17  
18 elderly and self-efficacy of nurses. In addition, the information about characteristics of the  
19  
20 caregivers and their work environment were also collected by a self-developed questionnaire.  
21  
22

23  
24 Facts on Aging Quiz I (FAQ I) developed by Palmore (1990) has been widely used to assess the  
25  
26 subjects' physical, mental and social knowledge about aging, as well as some of the most common  
27  
28 misconceptions about aging<sup>17,21</sup>. FAQ I is composed of 25 statements, for example "old people tend  
29  
30 to react slower than young people", "Older people are not as efficient as young people". The  
31  
32 participants responded by stating whether a statement is true (T) or false (F) and are assigned a score  
33  
34 of 1 if answer is right, otherwise a score of 0. Therefore, the total scores ranged from 0 to 25, with  
35  
36 a higher score representing better knowledge about the elderly. Chinese language version of FAQ I  
37  
38 introduced by Wang and his colleagues was found to possess adequate reliability with  $\alpha=0.68$ <sup>22</sup>.  
39  
40  
41  
42

43  
44 KAOP, developed by Kogan in 1961, has been used to measure attitude toward the aged in many  
45  
46 studies. This scale contains 34-item with 17 negative (KAOP-) and 17 (KAOP+) positive statement,  
47  
48 for example, "most the elderly gets set in their ways and are unable to change", and "it is very easy  
49  
50 to get on with the elderly". Each item in scale adopted 6-point Likert (strongly disagree = 1, disagree  
51  
52 = 2, slightly disagree = 3, slightly agree = 5, and strongly agree = 6). The scores on the statement  
53  
54 presented negatively had to be reversed in order to obtain the total score. The total scores for the  
55  
56  
57  
58  
59  
60

1  
2  
3  
4 KOAP is from 34 to 204, with higher scores representing positive attitude toward the aged<sup>14</sup>. For  
5  
6 the Chinese version of KOAP, the Cronbach's alpha was 0.82 for the total scale, indicating it is a  
7  
8 fully reliable instrument<sup>23</sup>.

9  
10  
11 GSE developed by Zhang and Schwarzer in 1995 is used widely to measure a general sense of  
12  
13 perceived self-efficacy<sup>24</sup>. The 10 items of the GSE are scored on a 4-point scale (not at all true=1,  
14  
15 hardly true=2, moderately true=3, exactly true=4) and yield scores that range from 10 to 40 with a  
16  
17 high score present indicating a greater self-efficacy. A Cronbach's alpha value of 0.89 for the  
18  
19 Chinese version of the GSE indicated this instrument tool has a high reliability for our study  
20  
21 population<sup>2</sup>.

22  
23  
24  
25  
26  
27 In the last part of the questionnaire, some closed-ended questions were design to collect some  
28  
29 information about background characteristics of participating caregivers and their work  
30  
31 environment<sup>17 25</sup>, such as age, gender, education level, work tenure, employment form, monthly  
32  
33 income, pre-job training, interest in working with the aged and job satisfaction (table 1).  
34  
35  
36

### 37 **Data analysis**

38  
39  
40 Score for each item corresponding to the three scales were added up and an average score was  
41  
42 calculated to evaluate level of knowledge, attitude and self-efficacy. According to the guidance on  
43  
44 use of each scale, every item was given a same weight.  
45  
46  
47

48  
49 Due to the normal distribution of knowledge, attitude and self-efficacy scores, Student's t-tests or  
50  
51 analysis of variance were performed to test the statistical differences in these scores across the  
52  
53 different groups. Then, multivariate linear regression models were established to identify the factors  
54  
55 influencing knowledge, attitude and self-efficacy scores serving the characteristics of respondents  
56  
57 as independent variables. We used the ENTER approach in the modelling, with a *p* value of less  
58  
59  
60

1  
2  
3  
4 than 0.05 being considered as statistically significant.  
5

6 A double entry strategy was adopted to ensure the accuracy of data input by using the EpiData 3.1.  
7

8  
9 All statistical analyses were performed using IBM SPSS Statistics V.22.0.  
10  
11  
12  
13

## 14 **Results**

### 15 **Characteristics of respondents**

16  
17 Of the 403 respondents, 89.8% were the female. 70.5% of respondents aged more than 40. Only  
18  
19 20.3% of caregivers in our study have completed bachelor degree or above. More than half of  
20  
21 respondents had work tenure of less than 3 years and worked in the urban setting. The majority  
22  
23 (86.8%) was employed as non-establishment staff. Only 10.7% earned a monthly income more than  
24  
25 ¥3000. 68.0% and 85.4% of respondents reported they received pre-job training and had an interest  
26  
27 in elderly care, respectively (table 1).  
28  
29  
30  
31  
32  
33

### 34 **Knowledge, attitude toward the elderly and self-efficacy**

35  
36 On average, the scores of knowledge measured by FAQ 1 and attitude measured by KAOP were  
37  
38 10.42±2.79 and 127.85±14.36, respectively. Scores of self-efficacies measured by GSE was  
39  
40 27.12±4.91.  
41  
42  
43  
44

45 Table1 showed the differences in scores of knowledge, attitude and self-efficacy rated by caregivers  
46  
47 with different characteristics. Male respondents had a higher score on attitude than female ( $p<0.05$ ).  
48  
49 the older caregivers showed a greater self-efficacy compared with the younger ( $p<0.05$ ). There was  
50  
51 statistically significant difference in the scores of knowledge among caregivers with different  
52  
53 degrees of education level ( $p<0.05$ ). In addition, a high score on knowledge and attitude was  
54  
55 reported among caregivers working in public NH presented ( $p<0.05$ ). Establishment staff had a  
56  
57  
58  
59  
60

1  
2  
3  
4 better performance on knowledge, attitude and self-efficacy ( $p<0.05$ ). Scores of attitudes increased  
5  
6 with a rise of monthly salary ( $p<0.001$ ). Those receiving pro-job training rated a higher score on  
7  
8 knowledge and self-efficacy ( $p<0.05$ ). Respondents with an interest in elderly care showed a better  
9  
10 performance on attitude and self-efficacy ( $p<0.05$ ). Caregivers with different level of job  
11  
12 satisfaction had significantly different score on all three domains ( $p<0.05$ ).  
13  
14  
15

16  
17 Table 1 differences in scores of knowledge, attitude and self-efficacy among different characteristics caregivers  
18

| Variables                  | N ( % )                                  | FAQ 1 scores     |                 | KAOP scores        |                 | Self-efficacy scores |                 |
|----------------------------|------------------------------------------|------------------|-----------------|--------------------|-----------------|----------------------|-----------------|
|                            |                                          | Mean $\pm$ SD    | <i>p</i> -value | Mean $\pm$ SD      | <i>p</i> -value | Mean $\pm$ SD        | <i>p</i> -value |
| <b>Gender</b>              |                                          |                  | 0.055           |                    | 0.034           |                      | 0.890           |
|                            | Male 41 ( 10.2 )                         | 11.22 $\pm$ 3.09 |                 | 132.30 $\pm$ 15.75 |                 | 27.02 $\pm$ 4.21     |                 |
|                            | Female 362 ( 89.8 )                      | 10.33 $\pm$ 2.75 |                 | 127.31 $\pm$ 14.13 |                 | 27.13 $\pm$ 4.98     |                 |
| <b>Age(years)</b>          |                                          |                  | 0.070           |                    | 0.909           |                      | 0.004           |
|                            | 30-39 119 ( 29.5 )                       | 10.37 $\pm$ 2.70 |                 | 128.22 $\pm$ 14.13 |                 | 26.33 $\pm$ 4.19     |                 |
|                            | 40-49 141 ( 35.0 )                       | 10.83 $\pm$ 2.96 |                 | 127.93 $\pm$ 15.07 |                 | 26.70 $\pm$ 5.41     |                 |
|                            | 50 $\leq$ 143 ( 35.5 )                   | 10.07 $\pm$ 2.66 |                 | 127.45 $\pm$ 13.93 |                 | 28.18 $\pm$ 4.79     |                 |
| <b>Education level</b>     |                                          |                  | 0.046           |                    | 0.276           |                      | 0.927           |
|                            | Junior high school or below 225 ( 55.8 ) | 10.23 $\pm$ 2.90 |                 | 126.93 $\pm$ 13.78 |                 | 27.09 $\pm$ 4.83     |                 |
|                            | Secondary high school 96 ( 23.8 )        | 11.04 $\pm$ 2.77 |                 | 129.72 $\pm$ 14.08 |                 | 27.03 $\pm$ 5.20     |                 |
|                            | Bachelor degree or above 82 ( 20.3 )     | 10.23 $\pm$ 2.44 |                 | 128.16 $\pm$ 16.11 |                 | 27.30 $\pm$ 4.81     |                 |
| <b>Work tenure (years)</b> |                                          |                  | 0.858           |                    | 0.172           |                      | 0.355           |
|                            | 1-3 222 ( 55.1 )                         | 10.47 $\pm$ 2.87 |                 | 129.70 $\pm$ 15.43 |                 | 27.44 $\pm$ 5.02     |                 |
|                            | 4-6 114 ( 28.3 )                         | 10.44 $\pm$ 2.81 |                 | 128.55 $\pm$ 10.61 |                 | 26.76 $\pm$ 4.64     |                 |

1  
2  
3  
4  
5  
6  
7  
8  
9  
10  
11  
12  
13  
14  
15  
16  
17  
18  
19  
20  
21  
22  
23  
24  
25  
26  
27  
28  
29  
30  
31  
32  
33  
34  
35  
36  
37  
38  
39  
40  
41  
42  
43  
44  
45  
46  
47  
48  
49  
50  
51  
52  
53  
54  
55  
56  
57  
58  
59  
60

|                                          |                         |              |            |       |              |        |            |
|------------------------------------------|-------------------------|--------------|------------|-------|--------------|--------|------------|
|                                          | 7≤                      | 67 ( 16.6 )  | 10.25±2.53 |       | 126.68±14.72 |        | 26.68±4.96 |
| <b>Ownership of nursing home</b>         |                         |              |            | 0.033 |              | 0.032  | 0.708      |
|                                          | Public                  | 132 ( 32.8 ) | 14.24±2.99 |       | 133.94±15.91 |        | 26.99±4.61 |
|                                          | Private                 | 271 ( 67.2 ) | 10.51±2.69 |       | 127.80±13.58 |        | 27.18±5.05 |
| <b>Work place</b>                        |                         |              |            | 0.127 |              | 0.862  | 0.296      |
|                                          | Urban                   | 249 ( 61.8 ) | 10.26±2.84 |       | 127.94±15.20 |        | 27.32±4.96 |
|                                          | Rural                   | 154 ( 38.2 ) | 10.69±2.71 |       | 127.69±12.95 |        | 26.78±4.82 |
| <b>Employment form</b>                   |                         |              |            | 0.037 |              | 0.011  | 0.042      |
|                                          | Non-establishment staff | 350 ( 86.8 ) | 10.24±2.81 |       | 127.05±14.20 |        | 25.33±4.47 |
|                                          | Establishment staff     | 53 ( 13.2 )  | 15.40±2.56 |       | 135.63±15.96 |        | 27.66±5.22 |
| <b>Monthly income (¥)</b>                |                         |              |            | 0.466 |              | <0.001 | 0.975      |
|                                          | < 2000                  | 160 ( 39.7 ) | 10.21±2.81 |       | 126.52±15.21 |        | 27.05±5.24 |
|                                          | 2000-3000               | 200 ( 49.6 ) | 10.56±2.74 |       | 127.13±12.71 |        | 27.16±4.91 |
|                                          | > 3000                  | 43 ( 10.7 )  | 10.60±3.00 |       | 136.11±15.59 |        | 27.18±3.51 |
| <b>Pre-job training</b>                  |                         |              |            | 0.040 |              | 0.106  | 0.001      |
|                                          | No                      | 129 ( 32.0 ) | 10.01±2.95 |       | 126.16±14.38 |        | 25.91±4.62 |
|                                          | Yes                     | 274 ( 68.0 ) | 10.62±2.70 |       | 128.64±14.31 |        | 27.69±4.94 |
| <b>The health status of the elderly</b>  |                         |              |            | 0.868 |              | 0.602  | <0.001     |
|                                          | Complete disability     | 34 ( 8.4 )   | 10.21±2.21 |       | 125.49±14.11 |        | 26.32±4.34 |
|                                          | Partial disability      | 219 ( 54.3 ) | 10.42±2.79 |       | 127.98±13.50 |        | 27.62±5.17 |
|                                          | No disability           | 150 ( 37.2 ) | 10.49±2.92 |       | 128.19±15.63 |        | 30.64±5.41 |
| <b>Interest in working with the aged</b> |                         |              |            | 0.273 |              | 0.019  | 0.022      |

|                         |                     |              |            |              |            |
|-------------------------|---------------------|--------------|------------|--------------|------------|
|                         | No                  | 58 ( 14.4 )  | 9.88±2.72  | 123.74±14.15 | 25.68±4.66 |
|                         | Yes                 | 344 ( 85.4 ) | 10.51±2.80 | 128.60±14.28 | 27.34±4.91 |
| <b>Job Satisfaction</b> |                     |              | 0.001      | 0.033        | 0.001      |
|                         | Not satisfied       | 34 ( 8.4 )   | 8.68±2.77  | 121.97±16.80 | 25.14±5.42 |
|                         | Generally satisfied | 151 ( 37.5 ) | 10.66±2.49 | 127.70±13.29 | 26.42±4.94 |
|                         | Very satisfied      | 218 ( 54.1 ) | 10.54±2.91 | 128.86±14.51 | 27.91±4.66 |

### Factors associated with knowledge, attitude and self-efficacy: results of multivariate linear regression analyses

Table 2 showed results of three multivariate linear regression models to analyze factors associated with knowledge, attitude and self-efficacy.

#### Knowledge about the elderly

Respondents with bachelor degree or above ( $\beta=0.232, p=0.018$ ) gave a higher score in FAQ I than those only completing junior high school or below. Receiving pre-job training ( $\beta=0.196, p<0.05$ ) had a positive effect on the knowledge scores. Job satisfaction ( $\beta=0.358-370, p<0.01$ ) was found to have a positive association with the knowledge.

#### Attitudes towards older people

The female ( $\beta=-0.112, p=0.026$ ) and respondents with more than 7 years' work experience ( $\beta=-0.130, p<0.05$ ) presented a negative response to attitude scores in KAOP. However, a higher score appeared on those caregivers who are employed as establishment staff ( $\beta=0.136, p=0.012$ ), earn more than 3,000 RMB per month ( $\beta=0.214, p<0.001$ ) and have an interest in working with the aged ( $\beta=0.191, p<0.05$ ).

#### Self-efficacy of caregivers

Age was significantly related to self-efficacy, where caregivers aged more than 50 ( $\beta=0.205$ ,  $p=0.002$ ) rated a higher score on self-efficacy. Pre-job training ( $\beta=0.165$ ,  $p=0.002$ ), interest in working with aged ( $\beta=0.154$ ,  $p=0.013$ ) and job satisfaction ( $\beta=0.174$ ,  $p<0.05$ ) were associated with scores. In addition, health status of the elderly who are provided care by caregivers also had a significant effect on self-efficacy, in which those with partial or no disability could have a better performance on self-efficacy ( $\beta=0.290-0.447$   $p\leq 0.001$ ).

In addition, we found that correlation coefficients between knowledge and attitudes was 0.233 ( $p<0.05$ ), and self-efficacy was 0.034 ( $p>0.05$ ) by Pearson correlation calculations. Meanwhile, a positive correction also appeared on between attitude and self-efficacy ( $r=0.150$ ,  $p<0.05$ ).

Table 2 Predictors of knowledge, attitude and self-efficacy: multivariate linear regression models

| Variables                   | FAQ 1 scores |                | KAOP scores |                | Self-efficacy scores |                |
|-----------------------------|--------------|----------------|-------------|----------------|----------------------|----------------|
|                             | $\beta$      | <i>p-value</i> | $\beta$     | <i>p-value</i> | $\beta$              | <i>p-value</i> |
| <b>Gender</b>               |              |                |             |                |                      |                |
| Male                        | Ref.         |                | Ref.        |                | Ref.                 |                |
| Female                      | -0.082       | 0.102          | -0.112      | 0.026          | 0.011                | 0.818          |
| <b>Age(years)</b>           |              |                |             |                |                      |                |
| 30-39                       | Ref.         |                | Ref.        |                | Ref.                 |                |
| 40-49                       | 0.110        | 0.102          | -0.017      | 0.792          | 0.095                | 0.131          |
| 50≤                         | -0.018       | 0.791          | -0.043      | 0.534          | 0.205                | 0.002          |
| <b>Education level</b>      |              |                |             |                |                      |                |
| Junior high school or below | Ref.         |                | Ref.        |                | Ref.                 |                |
| Secondary high school       | 0.102        | 0.067          | 0.076       | 0.170          | 0.015                | 0.772          |

|                                         |                          |        |       |        |        |        |       |
|-----------------------------------------|--------------------------|--------|-------|--------|--------|--------|-------|
|                                         | Bachelor degree or above | 0.232  | 0.018 | -0.013 | 0.840  | 0.023  | 0.708 |
| <b>Working tenure(years)</b>            |                          |        |       |        |        |        |       |
|                                         | 1-3                      | Ref.   |       | Ref.   |        | Ref.   |       |
|                                         | 4-6                      | -0.005 | 0.923 | 0.094  | 0.071  | -0.089 | 0.075 |
|                                         | 7≤                       | -0.056 | 0.290 | -0.130 | 0.044  | -0.048 | 0.344 |
| <b>Ownership of nursing home</b>        |                          |        |       |        |        |        |       |
|                                         | Public                   | Ref.   |       | Ref.   |        | Ref.   |       |
|                                         | Private                  | 0.032  | 0.528 | -0.001 | 0.984  | 0.057  | 0.242 |
| <b>Work place</b>                       |                          |        |       |        |        |        |       |
|                                         | Urban                    | Ref.   |       | Ref.   |        | Ref.   |       |
|                                         | Rural                    | 0.054  | 0.286 | -0.022 | 0.663  | -0.003 | 0.956 |
| <b>Employment form</b>                  |                          |        |       |        |        |        |       |
|                                         | Non-establishment staff  | Ref.   |       | Ref.   |        | Ref.   |       |
|                                         | Establishment staff      | 0.109  | 0.052 | 0.136  | 0.012  | 0.102  | 0.069 |
| <b>Monthly income (¥)</b>               |                          |        |       |        |        |        |       |
|                                         | < 2000                   | Ref.   |       | Ref.   |        | Ref.   |       |
|                                         | 2000-3000                | 0.015  | 0.784 | -0.004 | 0.939  | 0.014  | 0.796 |
|                                         | > 3000                   | 0.036  | 0.516 | 0.214  | <0.001 | -0.004 | 0.936 |
| <b>Pre-job training</b>                 |                          |        |       |        |        |        |       |
|                                         | No                       | Ref.   |       | Ref.   |        | Ref.   |       |
|                                         | Yes                      | 0.196  | 0.047 | 0.056  | 0.305  | 0.165  | 0.002 |
| <b>The health status of the elderly</b> |                          |        |       |        |        |        |       |



|                                          |       |        |       |       |       |        |  |
|------------------------------------------|-------|--------|-------|-------|-------|--------|--|
| Complete disability                      | Ref.  |        | Ref.  |       | Ref.  |        |  |
| Partial disability                       | 0.001 | 0.987  | 0.114 | 0.214 | 0.447 | <0.001 |  |
| No disability                            | 0.010 | 0.910  | 0.084 | 0.362 | 0.290 | 0.001  |  |
| <b>Interest in working with the aged</b> |       |        |       |       |       |        |  |
| No                                       | Ref.  |        | Ref.  |       | Ref.  |        |  |
| Yes                                      | 0.080 | 0.122  | 0.191 | 0.039 | 0.154 | 0.013  |  |
| <b>Job Satisfaction</b>                  |       |        |       |       |       |        |  |
| Not satisfied                            | Ref.  |        | Ref.  |       | Ref.  |        |  |
| Generally satisfied                      | 0.358 | <0.001 | 0.081 | 0.393 | 0.052 | 0.572  |  |
| Very satisfied                           | 0.370 | <0.001 | 0.109 | 0.278 | 0.174 | 0.044  |  |
| F                                        | 2.378 |        | 2.344 |       | 3.740 |        |  |
| <i>p</i> (model fit)                     |       | 0.001  |       | 0.001 |       | <0.001 |  |
| R <sup>2</sup>                           | 0.116 |        | 0.114 |       | 0.171 |        |  |

## Discussion

With accelerated aging, meeting the increasing demands for professional aged healthcare become a great challenge for Chinese government. This study assessed the knowledge, attitude toward the ageing and self-efficacy of elderly caregivers working in NHs from Liaoning province. Overall, the findings indicated that there was relative low-level of knowledge, attitude and self-efficacy comparing with other countries or regions. Due to initial stage of NHs development in China, severe shortage of qualified workers and professional training resulted in the majority of health workers had difficulties in coping with heavy working burden<sup>3</sup>. In addition, lower income and negative

1  
2  
3  
4 expectations for career development created an adverse impact on their work performance<sup>26</sup>. These  
5  
6 unfavorable factors affected perception of caregivers on knowledge, attitude and self-efficacy to  
7  
8  
9 great extent.

10  
11 Consistent with other studies<sup>11 27</sup>, the results found the caregivers who received high level education  
12  
13 and pro-job training gave a high score on knowledge about the elderly measured by FAQ 1. The  
14  
15 possible reason is that long-term education and professional training not only improve working  
16  
17 ability, but can deepen the understanding for their profession, thus changing misconceptions about  
18  
19 older adults. In addition, high-level job satisfaction, as a driving force factor, was found to  
20  
21 encourage staff to learn more knowledge related to their works<sup>28</sup>.

22  
23 In terms of attitude toward the elderly, this study indicated the female were more likely to have a  
24  
25 negative attitude comparing with male, which was inconsistent with other studies<sup>17 29</sup>. The potential  
26  
27 explanation is the burden that women in Chinese traditional family take responsibility for cultivating  
28  
29 the children and taking care of the old people resulted in female caregivers developing bad attitudes.  
30  
31 Work tenure was corrected negatively with attitudes can be explained by the fact long-term work in  
32  
33 the same position can increase burnout<sup>30</sup>, thus resulting in negative emotion to works.

34  
35 Similar to other study<sup>31</sup>, those employed as establishment staff had a positive attitude toward the  
36  
37 elderly than non-establishment staff. This finding mainly related to salary system in Chines NHs.

38  
39 Generally, establishment staff can obtain more payment than non-establishment, although they did  
40  
41 the same works. <sup>32</sup>. Consequently, an unequal payback for non-establishment staff leaded to a  
42  
43 negative attitude towards their works. In addition, the fact that KAOP scores increased with a rise  
44  
45 of income maybe link to a reason that an increased salary, as an incentive strategy, can improve  
46  
47 work enthusiasm of employees, thus presenting a better performance <sup>33</sup>. Moreover, caregivers with  
48  
49  
50  
51  
52  
53  
54  
55  
56  
57  
58  
59  
60

1  
2  
3  
4 interests in working with the aged reported more positive attitudes. A possible explanation for it is  
5  
6 a good interest in their job can alleviate the perceived work stress and further reduce prejudice  
7  
8 against the elderly<sup>34 35</sup>.

9  
10  
11 The present study found that the age of caregivers, in line with previous study, had a positive  
12  
13 relationship with self-efficacy<sup>36</sup>. This is because people can deepen the self-perception for their  
14  
15 ability and cope with work more easily with an increase in age and life experience. Similarly,  
16  
17 improvement of work skills by pro-job training might create a positive effect on perceived self-  
18  
19 efficacy<sup>37</sup>.

20  
21  
22 In addition, the health status of the aged served by caregivers was found to be associated with self-  
23  
24 efficacy scores. This result mainly related to fact the old adults without disability can reduce  
25  
26 workload and difficulties of caregivers greatly during provision of health services comparing with  
27  
28 the disabled<sup>38</sup>, thereby improving perception on self-abilities. Meanwhile, the finding on positive  
29  
30 impact of interest in working with the old and high-level job satisfaction on self-efficacy indicated  
31  
32 these factors can evoke enthusiastic attitudes toward works.

33  
34  
35 Actually, the positive relationship among knowledge, attitude and self-efficacy presented in this  
36  
37 study agrees with “knowledge-attitude-practice (KAP)” theory<sup>39 40</sup>. Although knowledge did not  
38  
39 associate with self-efficacy directly, it plays indirect role in connection between attitude and self-  
40  
41 efficacy. Therefore, an effective workforce management for caregivers should take improvement of  
42  
43 knowledge, attitude and self-efficacy into account synthetically.

#### 44 45 46 47 48 49 50 51 52 53 54 55 56 **Limitation**

57  
58 There are some limitations in this study should be mentioned. Firstly, 402 sample sizes from  
59  
60

1  
2  
3  
4 Liaoning province in present study were limited to reflect comprehensive situation of China, despite  
5  
6 it is enough for data analysis. Caution needs to be taken when generalizing the findings. Additionally,  
7  
8 the variables in our research model are not comprehensive, despite the selection of these variables  
9  
10 is supported by literature and interviews. Further research considering other variables potentially  
11  
12 influencing knowledge, attitude and self-efficiency of elderly caregivers would generate more  
13  
14 insights. Finally, readers should be aware that participants may report what they think the researcher  
15  
16 wants to know rather than the truth by using a self-reporting questionnaire, which resulted in their  
17  
18 responses can be idealized to meet socially acceptable norms.  
19  
20  
21  
22  
23  
24  
25

## 26 **Conclusion**

27  
28  
29 This study sheds some light on caregivers-perceived knowledge, attitude about the elderly and self-  
30  
31 efficacy in Chinese NHs, and identify their associated the characteristics and work environment  
32  
33 factors. A relatively poor-level knowledge, attitude and self-efficacy suggest more emphasis should  
34  
35 be placed on improvement of these attributes. The findings related to factors provide the implication  
36  
37 that continuing education and professional training should be considered as a strategy to improve  
38  
39 knowledge and self-efficacy. Additionally, an increased income and equal payment can help  
40  
41 develop a positive attitude toward the old people. Furthermore, some measures related to foster an  
42  
43 interest in working with the elderly and improve job satisfaction of caregivers also should be given  
44  
45 an appropriate attention.  
46  
47  
48  
49  
50  
51  
52  
53  
54

## 55 **Ethics approval and consent to participate**

56  
57  
58 Our study was approved by the ethics committee of Jinzhou Medical University  
59  
60

### Consent for publication

Consent for publication was obtained from persons we investigated in this study.

### Availability of data and material

The data sets analyzed during this study are available from the corresponding author on reasonable request

### Competing interests

The authors declare that they have no competing interests.

### Funding

This work was supported by Liaoning Provincial Social Science Project (NO.2019lslktyb-067)

### Authors' contributions

All authors made significant contributions to the study. HZ conceptualized this study and analyzed the data. Moreover, she wrote the first draft of the manuscript. HS interpreted the results and revised the manuscript. The final version submitted for publication was read and approved by all authors.

### Acknowledgements

The authors gratefully acknowledge all interviewees participating in this study.

### Reference

1. Wu M, Li SX, Zhang NJ, et al. Nursing home research in Jinan, China: a focus group approach. *International Journal of Public Policy* 2012;1(8):21-30.
2. Fua F, Lianga Y, Anb Y, et al. Self-efficacy and psychological well-being of nursing home residents in China: the mediating role of social engagement. *Asia Pacific Journal of Social Work and Development* 2018;28(2):128-40.

- 1  
2  
3  
4 3. Song Y, Anderson RA, Corazzini KN, et al. Staff characteristics and care in Chinese nursing  
5  
6 homes: A systematic literature review. *International Journal of Nursing Sciences*  
7  
8  
9 2014;1(4):423-36.  
10
- 11  
12 4. Chan YK, Lee RPL. Network Size, Social Support and Happiness in Later Life: A  
13  
14 Comparative Study of Beijing and Hong Kong. *Journal of Happiness Studies*  
15  
16  
17 2006;7(1):87-112.  
18
- 19  
20 5. Wong YC, Leung J. Long-term care in China: issues and prospects. *J Gerontol Soc Work*  
21  
22 2012;55(7):570-86.  
23
- 24  
25 6. Zhan HJ. Population Aging and Long-Term Care in China. *Generations* 2013;37(1):53-58.  
26
- 27  
28 7. Hao Q, Wu S, Ying L, et al. Current dilemmas of nursing homes in Chengdu: a cross-sectional  
29  
30 survey. *Journal of the American Medical Directors Association* 2012;13(4):406.e9-  
31  
32 06.e12.  
33
- 34  
35 8. Feng Z, Liu C, Guan X, et al. China's Rapidly Aging Population Creates Policy Challenges  
36  
37 In Shaping A Viable Long-Term Care System. *Health Affairs* 2012;31(12):2764-73.  
38
- 39  
40 9. Zhang H. Who will care for our parents? Changing boundaries of family and public roles in  
41  
42 providing care for the aged in urban China. *Care Management Journals* 2007;8(1):1-  
43  
44 10.  
45  
46  
47
- 48  
49 10. Lee AC, Wong AK, Loh EK. Score in the Palmore's Aging Quiz, knowledge of community  
50  
51 resources and working preferences of undergraduate nursing students toward the  
52  
53 elderly in Hong Kong. *Nurse Educ Today* 2006;26(4):269-76.  
54
- 55  
56 11. Scerri A, Scerri C. Nursing students' knowledge and attitudes towards dementia — A  
57  
58 questionnaire survey. *Nurse Education Today* 2013;33(9):962-68.  
59  
60

- 1  
2  
3  
4 12. Cui Y, Fan R, Wang YM, et al. A Changing Healthcare System Model: The Effectiveness of  
5  
6 Knowledge, Attitude, and Skill of Nursing Assistants Who Attend Senile Dementia  
7  
8 Patients in Nursing Homes in Xi'an, China - A Questionnaire Survey. *Ochsner J*  
9  
10 2014;14(3):328-34.  
11  
12  
13  
14 13. Hu SH, Yu YM, Chang WY, et al. Social support and factors associated with self-efficacy  
15  
16 among acute-care nurse practitioners. *Journal of Clinical Nursing* 2017;27(2):876-82.  
17  
18  
19 14. Wang CC, Liao WC, Kao MC, et al. Taiwanese medical and nursing student interest levels  
20  
21 in and attitudes towards geriatrics. *Annals of the Academy of Medicine Singapore*  
22  
23 2009;38(3):230.  
24  
25  
26  
27 15. Zisberg A, Topaz M, Bandwintershtein T. Cultural- and Educational-Level Differences in  
28  
29 Students Knowledge, Attitudes, and Preferences for Working With Older Adults: An  
30  
31 Israeli Perspective. *Journal of Transcultural Nursing* 2015;26(2):194-201.  
32  
33  
34  
35 16. MS MHvZ, PhD MPR, MD MS, et al. Medical Students' Positive and Negative  
36  
37 Misconceptions About the Elderly. *Gerontology & Geriatrics Education* 2001;21(3):31-  
38  
39 40.  
40  
41  
42  
43 17. Hweidi IM, Alhassan MA. Jordanian nurses' attitudes toward older patients in acute care  
44  
45 settings. *International Nursing Review* 2010;52(3):225-32.  
46  
47  
48  
49 18. Gallagher S, Bennett KM, Halford JC. A comparison of acute and long-term health-care  
50  
51 personnel's attitudes towards older adults. *International Journal of Nursing Practice*  
52  
53 2010;12(5):273-79.  
54  
55  
56 19. Jacelon CS. Attitudes and behaviors of hospital staff toward elders in an acute care setting  
57  
58 *Applied Nursing Research* 2002;15(4):227-34.  
59  
60

- 1  
2  
3  
4 20. Network CY. The growth rate of the elderly population in Liaoning Province slowed down in  
5  
6 2017, and the population of young and old people increased rapidly. 2017 [Available  
7  
8  
9 from:  
10  
11 [https://sh.qq.com/9715f9adce7664579?cota=1&refer\\_scene=so\\_1&sign=360\\_e39](https://sh.qq.com/9715f9adce7664579?cota=1&refer_scene=so_1&sign=360_e39)  
12  
13 [369d1](#).  
14  
15  
16  
17 21. Kane RL. Ageism: Negative and Positive 2nd Edition. *Journal of Public Health Policy*  
18  
19 2000;21(2):247-49.  
20  
21  
22 22. Wang CC, Liao WP, Yuan SC, et al. The Chinese version of the Facts on Aging Quiz scale:  
23  
24 reliability and validity assessment. *International Journal of Nursing Studies*  
25  
26 2010;47(6):742-52.  
27  
28  
29  
30 23. Yen CH, Liao WC, Chen YR, et al. A Chinese version of Kogan's Attitude Toward Older  
31  
32 People Scale: reliability and validity assessment. *International Journal of Nursing*  
33  
34 *Studies* 2009;46(1):38-44.  
35  
36  
37  
38 24. Schwarzer R, Bäßler J, Kwiatek P, et al. The assessment of optimistic self-beliefs:  
39  
40 Comparison of the German, Spanish, and Chinese versions of the General Self-  
41  
42 efficacy Scale. *Applied Psychology* 2010;46(1):69-88.  
43  
44  
45  
46 25. Richter J, Eisemann MR. Attitudinal patterns determining decision-making in severely ill  
47  
48 elderly patients: a cross-cultural comparison between nurses from Sweden and  
49  
50 Germany. *International Journal of Nursing Studies* 2001;38(4):381-88.  
51  
52  
53  
54 26. Gaugler JE, Mittelman MS, Hepburn K, et al. Predictors of change in caregiver burden and  
55  
56 depressive symptoms following nursing home admission. *Psychol Aging*  
57  
58 2009;24(2):385-96.  
59  
60



- 1  
2  
3  
4 27. Lambrinou E, Sourtzi P, Kalokerinou A, et al. Attitudes and knowledge of the Greek nursing  
5  
6 students towards older people. *Nurse Educ Today* 2009;29(6):617-22.  
7  
8  
9 28. Humphris GM, Turner A. Job satisfaction and attitudes of nursing staff on a unit for the  
10  
11 elderly severely mentally infirm, with change of location. *Journal of Advanced Nursing*  
12  
13 1989;14(4):298.  
14  
15  
16 29. Sung KT. Respect for Elders: Myths and Realities in East Asia. *Journal of Aging & Identity*  
17  
18 2000;5(4):197-205.  
19  
20  
21 30. Lamb HR. Staff burnout in work with long-term patients. *Hospital & Community Psychiatry*  
22  
23 1979;30(6):396-8.  
24  
25  
26 31. P S. Interactions of nurses with elderly patients: relationship to nurses' attitudes and to  
27  
28 formal activity periods. *Journal of Advanced Nursing* 2010;18(1):14-19.  
29  
30  
31 32. Zuo H. Formal and Informal Employment in China: Probability of Employment and  
32  
33 Determinants of Monthly Wages. *Australian Economic Review* 2013;46(4):405-23.  
34  
35  
36 33. Idrees Z, Xinping X, Shafi K, et al. Effect of salary, training and motivation on job  
37  
38 performance of employees. *American Journal of Business, Economics and*  
39  
40  
41  
42  
43  
44  
45  
46 34. Undergraduate Nursing Students and the Elderly: an Assessment of Attitudes in a Turkish  
47  
48 University. Apha Meeting and Exposition; 2017.  
49  
50  
51 35. Monnot MJ, Beehr TA. Subjective well-being at work: Disentangling source effects of stress  
52  
53 and support on enthusiasm, contentment, and meaningfulness. *Journal of Vocational*  
54  
55  
56  
57  
58  
59 36. Li J, He Z, Luo Y, et al. Perceived Transcultural Self-Efficacy of Nurses in General Hospitals  
60

- 1  
2  
3  
4 in Guangzhou, China. *Nursing Research* 2016;65(5):371-79.  
5  
6  
7 37. Hendrix CC, Landerman R, Abernethy AP. Effects of an individualized caregiver training  
8  
9 intervention on self-efficacy of cancer caregivers. *West J Nurs Res* 2013;35(5):590-  
10  
11 610.  
12  
13  
14 38. Uysal A, Albayrak B, Koçulu B, et al. Attitudes of nursing students toward people with  
15  
16 disabilities. *Nurse Educ Today* 2014;34(5):878-84.  
17  
18  
19 39. Howell D, Butler L, Vincent L, et al. Influencing nurses' knowledge, attitudes, and practice  
20  
21 in cancer pain management. *Cancer Nursing* 2000;23(1):55.  
22  
23  
24 40. Pan HH, Shih HL, Wu LF, et al. Path modeling of knowledge, attitude and practice toward  
25  
26 palliative care consultation service among Taiwanese nursing staff: a cross-sectional  
27  
28 study. *Bmc Palliative Care* 2017;16(1):42.  
29  
30  
31  
32  
33  
34  
35  
36  
37  
38  
39  
40  
41  
42  
43  
44  
45  
46  
47  
48  
49  
50  
51  
52  
53  
54  
55  
56  
57  
58  
59  
60

STROBE 2007 (v4) Statement—Checklist of items that should be included in reports of cross-sectional studies

| Section/Topic             | Item # | Recommendation                                                                                                                                                                       | Reported on page # |
|---------------------------|--------|--------------------------------------------------------------------------------------------------------------------------------------------------------------------------------------|--------------------|
| Title and abstract        | 1      | (a) Indicate the study’s design with a commonly used term in the title or the abstract                                                                                               | Page1              |
|                           |        | (b) Provide in the abstract an informative and balanced summary of what was done and what was found                                                                                  | Page2-3            |
| <b>Introduction</b>       |        |                                                                                                                                                                                      |                    |
| Background/rationale      | 2      | Explain the scientific background and rationale for the investigation being reported                                                                                                 | Page4-5            |
| Objectives                | 3      | State specific objectives, including any prespecified hypotheses                                                                                                                     | Page5              |
| <b>Methods</b>            |        |                                                                                                                                                                                      |                    |
| Study design              | 4      | Present key elements of study design early in the paper                                                                                                                              | Page5-6            |
| Setting                   | 5      | Describe the setting, locations, and relevant dates, including periods of recruitment, exposure, follow-up, and data collection                                                      | Page6              |
| Participants              | 6      | (a) Give the eligibility criteria, and the sources and methods of selection of participants                                                                                          | Page6              |
| Variables                 | 7      | Clearly define all outcomes, exposures, predictors, potential confounders, and effect modifiers. Give diagnostic criteria, if applicable                                             | Page7              |
| Data sources/ measurement | 8*     | For each variable of interest, give sources of data and details of methods of assessment (measurement). Describe comparability of assessment methods if there is more than one group | Page7              |
| Bias                      | 9      | Describe any efforts to address potential sources of bias                                                                                                                            | Page6              |
| Study size                | 10     | Explain how the study size was arrived at                                                                                                                                            | Page6              |
| Quantitative variables    | 11     | Explain how quantitative variables were handled in the analyses. If applicable, describe which groupings were chosen and why                                                         | Page7-8            |
| Statistical methods       | 12     | (a) Describe all statistical methods, including those used to control for confounding                                                                                                | Page8              |
|                           |        | (b) Describe any methods used to examine subgroups and interactions                                                                                                                  | Page8              |
|                           |        | (c) Explain how missing data were addressed                                                                                                                                          | Page6              |
|                           |        | (d) If applicable, describe analytical methods taking account of sampling strategy                                                                                                   | Not applicable     |
|                           |        | (e) Describe any sensitivity analyses                                                                                                                                                | Not applicable     |
| <b>Results</b>            |        |                                                                                                                                                                                      |                    |

|                          |     |                                                                                                                                                                                                              |                |
|--------------------------|-----|--------------------------------------------------------------------------------------------------------------------------------------------------------------------------------------------------------------|----------------|
| Participants             | 13* | (a) Report numbers of individuals at each stage of study—eg numbers potentially eligible, examined for eligibility, confirmed eligible, included in the study, completing follow-up, and analysed            | Page9-11       |
|                          |     | (b) Give reasons for non-participation at each stage                                                                                                                                                         | Not applicable |
|                          |     | (c) Consider use of a flow diagram                                                                                                                                                                           | Not applicable |
| Descriptive data         | 14* | (a) Give characteristics of study participants (eg demographic, clinical, social) and information on exposures and potential confounders                                                                     | Page9-11       |
|                          |     | (b) Indicate number of participants with missing data for each variable of interest                                                                                                                          | Not applicable |
| Outcome data             | 15* | Report numbers of outcome events or summary measures                                                                                                                                                         | Page9          |
| Main results             | 16  | (a) Give unadjusted estimates and, if applicable, confounder-adjusted estimates and their precision (eg, 95% confidence interval). Make clear which confounders were adjusted for and why they were included | Page 12-15     |
|                          |     | (b) Report category boundaries when continuous variables were categorized                                                                                                                                    | Not applicable |
|                          |     | (c) If relevant, consider translating estimates of relative risk into absolute risk for a meaningful time period                                                                                             | Not applicable |
| Other analyses           | 17  | Report other analyses done—eg analyses of subgroups and interactions, and sensitivity analyses                                                                                                               | Not applicable |
| <b>Discussion</b>        |     |                                                                                                                                                                                                              |                |
| Key results              | 18  | Summarise key results with reference to study objectives                                                                                                                                                     | Page15         |
| Limitations              | 19  | Discuss limitations of the study, taking into account sources of potential bias or imprecision. Discuss both direction and magnitude of any potential bias                                                   | Page17         |
| Interpretation           | 20  | Give a cautious overall interpretation of results considering objectives, limitations, multiplicity of analyses, results from similar studies, and other relevant evidence                                   | Page15-17      |
| Generalisability         | 21  | Discuss the generalisability (external validity) of the study results                                                                                                                                        | Page 18        |
| <b>Other information</b> |     |                                                                                                                                                                                                              |                |
| Funding                  | 22  | Give the source of funding and the role of the funders for the present study and, if applicable, for the original study on which the present article is based                                                | Page19         |

\*Give information separately for cases and controls in case-control studies and, if applicable, for exposed and unexposed groups in cohort and cross-sectional studies.

**Note:** An Explanation and Elaboration article discusses each checklist item and gives methodological background and published examples of transparent reporting. The STROBE checklist is best used in conjunction with this article (freely available on the Web sites of PLoS Medicine at <http://www.plosmedicine.org/>, Annals of Internal Medicine at <http://www.annals.org/>, and Epidemiology at <http://www.epidem.com/>). Information on the STROBE Initiative is available at [www.strobe-statement.org](http://www.strobe-statement.org).

# BMJ Open

## Knowledge, attitude and self-efficacy of elderly caregivers in Chinese nursing homes: a cross-sectional study in Liaoning province

|                                 |                                                                                                                                                                   |
|---------------------------------|-------------------------------------------------------------------------------------------------------------------------------------------------------------------|
| Journal:                        | <i>BMJ Open</i>                                                                                                                                                   |
| Manuscript ID                   | bmjopen-2019-029869.R1                                                                                                                                            |
| Article Type:                   | Original research                                                                                                                                                 |
| Date Submitted by the Author:   | 16-Jul-2019                                                                                                                                                       |
| Complete List of Authors:       | Zhang, Huijun; Tianjin University, School of Pharmaceutical Science and Technology; Jinzhou Medical University, School of Nursing<br>Sun, He; Tianjin University, |
| <b>Primary Subject Heading</b>: | Nursing                                                                                                                                                           |
| Secondary Subject Heading:      | Occupational and environmental medicine                                                                                                                           |
| Keywords:                       | knowledge, attitude, self-efficacy, elderly caregivers, nursing homes, China                                                                                      |
|                                 |                                                                                                                                                                   |

SCHOLARONE™  
Manuscripts

1  
2  
3 **Knowledge, attitude and self-efficacy of elderly caregivers in Chinese nursing**  
4 **homes: a cross-sectional study in Liaoning province**  
5  
6  
7

8  
9 **Huijun Zhang**  
10

11 Affiliated institution: 1, School of Pharmaceutical Science and Technology, Tianjin  
12  
13 University, Tianjin, China; 2, School of Nursing, Jinzhou Medical University, Jinzhou,  
14  
15 Liaoning province, China  
16  
17

18  
19 E-mail: [13904069606@163.com](mailto:13904069606@163.com)  
20  
21

22  
23  
24  
25 **He Sun ( Corresponding author )**  
26

27 Affiliated institution: School of Pharmaceutical Science and Technology, Tianjin  
28  
29 University, Tianjin, China  
30  
31

32 E-mail: [18768429445@163.com](mailto:18768429445@163.com)  
33  
34  
35  
36  
37  
38  
39  
40  
41  
42  
43  
44  
45  
46  
47  
48  
49  
50  
51  
52  
53  
54  
55  
56  
57  
58  
59  
60

## Abstract

**Objectives** This study aimed to investigate the perceptions of elderly caregivers in Chinese nursing homes and associated factors in regard to the knowledge, attitude about old adults and self-efficacy.

**Setting** A cross-sectional questionnaire survey was conducted on twelve nursing homes in Liaoning province, China.

**Participants** A total of 403 caregivers from 12 nursing homes were surveyed.

**Outcome measures** A Self-administered questionnaire composed of the Palmore's Facts on Aging Quiz I, the Kogan's Attitude Old People Scale, Generalized Self-efficacy Scale and background characteristics of participants was used for data collection. An average score for knowledge, attitude and self-efficacy was calculated. In addition, these scores were tested the differences across the different groups with adaptation of Student's t-tests and analysis of variance. Multivariable linear regression models were established to estimate the associated factors.

**Results** The participating caregivers reported a relative low score on knowledge about the elderly ( $10.42 \pm 2.79$ ), attitude toward old people ( $127.85 \pm 14.36$ ) and self-efficacy ( $27.12 \pm 4.9$ ). Multivariable regression analysis showed respondents with high-level educational level ( $\beta=0.232$ ,  $95\%CI: 0.827$  to  $0.907$ ), receiving pro-job training ( $\beta=0.196$ ,  $95\% CI: 0.121$  to  $1.169$ ) and high job satisfaction ( $\beta=0.358$ ,  $95\% CI: 0.123$  to  $1.875$ ,  $0.110$  to  $1.283$ ) gave a positive rating on knowledge. The caregivers who employed as formal staff ( $\beta=0.136$ ,  $95\%CI: 0.016$  to  $7.670$ ), earned a higher income ( $\beta=0.214$ ,  $95\%CI: 0.009$  to  $4.561$ ) and had an interest in working with the elderly ( $\beta=0.191$ ,  $95\%CI: 0.018$  to  $2.808$ ) tended to develop a positive attitude toward the old, but a negative association appeared for the female ( $\beta=-0.112$ ,  $95\%CI: -1.753$  to  $-0.010$ ) and those with longer work experience ( $\beta=-0.130$ ,  $95\%CI: -2.827$  to  $-0.018$ ). those caregivers who were older ( $\beta=0.205$ ,  $95\%CI:$

0.039 to 3.427), received pro-job training ( $\beta=0.165$ , 95%CI: 0.053 to 2.934), had an interest in working with old adults ( $\beta=0.154$ , 95%CI: 0.004 to 2.085), a high job satisfaction ( $\beta=0.174$ , 95%CI: 0.026 to 3.548) and perceived a better health status of the old ( $\beta=0.290$ , 0.447, 95%CI: 0.059 to 2.700, 0.053 to 1.211) gave a positive rating on self-efficacy.

### Conclusion

Overall, knowledge about the elderly, attitude toward old people and self-efficacy of elderly caregivers in Chinese nursing homes were the low level. Differentiated factors associated with these attributes suggest some targeted intervention actions should be given a priority.

### Strengths and limitations of this study

- This study is among the first to understand perception of caregivers in Chinese nursing homes on knowledge about aging, attitude toward the old and self-efficacy.
- Multivariable linear regression models were established, identifying multi-faceted factors associated with caregivers-perceived knowledge, attitude and self-efficacy.
- Using widely accepted scales (FAQ 1, KAOP and GSE) for data collection made results of present study more reliable.
- The samples of this study were collected from only one province located in the northeastern region of China. Caution needs to be taken when generalizing the findings to China or other countries as well.



## Introduction

The phenomenon of population ageing has been highlighted around the world, especially in China.

According to the National Bureau of Statistics of China (2017), the elderly population aged 60 and over has reached 240 million, accounting for 17.3% of the total population<sup>1 2</sup>. By 2050, this number is expected to climb to 450 million, accounting for 33% of its total population<sup>3</sup>. In other word, China will become the country with the largest number of old people in the world. Obviously, such growth in population aging will result in dramatically increased needs for the long-term care.

Influenced by Chinese traditional culture, elderly people prefer to live with their children, and taking care for the elderly is regarded as the responsibility of the family<sup>4</sup>. However, a growing migration from rural to urban areas, especially among young people, and the shrinking average family size due to China's one-child policy<sup>5 6</sup> have changed mainstream informal family-based caregiving model for older adults. Consequently, more old people were sent to nursing homes (NHs) for a professional aged care.

Over the past few years, Chinese government made a great effort to support the development of the aged care service industry and invested a lot into NHs. To date, there are approximately 155,000 different type of NHs across Mainland China including old age homes, retirement departments, residential care facilities, welfare institutes, and geriatric hospitals. However, health workers in NHs are great shortage and lack formal vocational training<sup>3</sup>. As a result, low-level caregiving skills and poor quality of health care become an urgent issue attracting a wide range of attention<sup>7 8</sup>. Although

1  
2  
3  
4 Chinese government launched "Basic Standards for Service Quality of Aged Agencies" in 2017,  
5  
6 quality of nursing services for the elderly is still not guaranteed<sup>9</sup>. Providing high-quality aged care  
7  
8 services seem to pose a huge challenge in coping with China's aging society.

9  
10  
11 Elderly caregivers in NHs, as the front-line health care workers, spend much time with the old  
12  
13 people and have a direct effect on health care delivery<sup>10</sup>. However, holding a negative attitude and  
14  
15 misunderstanding about aging often created an adverse impact on provision of health care behavior  
16  
17 and ultimately lead to bad health outcomes demonstrated in other studies<sup>11 12</sup>. In addition to attitude  
18  
19 and knowledge, Self-efficacy, defined as "people's beliefs about their capabilities to exercise  
20  
21 control over events that effect their lives"<sup>13</sup>, is another widely recognized factor associated with  
22  
23 health works' behavior in the care delivery. Generally, high self-efficacy is associated with positive  
24  
25 feelings about one's self, which facilitate cognitive processes and work achievement as well as  
26  
27 confidence and motivation<sup>14</sup>. Therefore, giving an emphasis on knowledge, attitude and self-  
28  
29 efficacy of caregivers is widely accepted as beneficial attempts for providing high-quality aged care  
30  
31 services.  
32  
33  
34  
35  
36  
37  
38  
39

40 Many studies conducted in western countries revealed social workers, health care workers and  
41  
42 nursing students tended to have a bad attitude, misconception, inadequate knowledge and lowest  
43  
44 priority to consider working with the older<sup>15-18</sup>. However, there is paucity in the literature involved  
45  
46 in low- and middle-income Asian countries, including China. Furthermore, there are great practical  
47  
48 significance to understand knowledge, attitude and self-efficacy of elderly caregivers in NHs with  
49  
50 a sharp increase in needs for aged care in China.  
51  
52  
53

54  
55  
56 This study aimed to investigate the perceptions of caregivers and associated factors in regard to  
57  
58 knowledge about aging, attitude toward the elderly and self-efficacy.  
59  
60

## Method

### Setting and sampling

A cross-sectional quantitative survey was conducted on Liaoning province located in the northeastern region of China with the population over 60 years old accounts for 22.65% of the total population<sup>19</sup>.

We adopted a multistage sampling strategy. Firstly, three cities were selected from three different geographical zones: Shenyang representing central, Jinzhou representing west and Dandong representing east. Then, four NHs (two for large size, two for small size) were selected randomly in each city according to their organization code, which resulted in 12 participating NHs. Finally, a half of caregivers were planned to considered as the sample in each selected NHs.

Data were collected over the period from November 1, 2015 to May 31, 2016. Two to four trained investigators assigned to each selected nursing home were required to invite caregivers working in different departments. The participants were asked to read the informed consent letter and gave oral consent before they filled out the questionnaires. We approached potential participants across the entire working time to maximize the chance of capturing a representative sample.

Due to the fact there is no standardized definition for NHs in Mainland China, NHs in this study were included in residential long-term care facilities in Mainland China that mainly admit people who are 60 years and older. A qualified elderly caregiver usually needs receive a 3-5 years professional training in China. Currently, caregivers in Chinese NHs mainly include physicians, nurses and allied health workers. In this study, the caregivers who provided direct care for the elderly were eligible to participate in the investigation. Simultaneously, participants have worked in the

1  
2  
3  
4 selected NHs for more than one year and they are voluntarily participated in the survey.  
5

6  
7 Ultimately, about 800 caregivers were invited to participate this investigation, and 480 participants  
8  
9 (60.0%) filled in and returned the questionnaire. After excluding questionnaires with uncompleted  
10  
11 key item, 403 (83.9%) left were valid for the data analysis (Figure 1). According to formula  
12  
13 proposed by Peduzzi et al<sup>20 21</sup>, the minimum sample size is at least 10 times  $K$ , where  $K$  is the  
14  
15 number of predictors in the regression model. Obviously, this sample size would be large enough  
16  
17 for us to perform multivariable linear regression analyses for a model containing 18 dichotomous  
18  
19 independent variables (Table 1).  
20  
21  
22

23  
24  
25 **(Figure 1 should be here)**  
26

## 27 **Measurement**

28  
29 We adopted Palmore's Facts on Aging Quiz I (FAQ 1), the Kogan's Attitude Old People Scale  
30  
31 (KAOP) and Generalized Self-efficacy Scale (GSE) to measure knowledge about old people,  
32  
33 attitude toward the elderly and self-efficacy of caregivers, respectively. In addition, the information  
34  
35 about characteristics of the caregivers and their work environment were also collected by a self-  
36  
37 developed questionnaire.  
38  
39

40  
41  
42 Facts on Aging Quiz I (FAQ I) developed by Palmore (1990) has been widely used to assess the  
43  
44 subjects' (including caregivers) physical, mental and social knowledge about aging, as well as some  
45  
46 of the most common misconceptions about aging<sup>15 22</sup>. FAQ 1 is composed of 25 statements, for  
47  
48 example "old people tend to react slower than young people", "Older people are not as efficient as  
49  
50 young people". The participants responded by stating whether a statement is true (T) or false (F)  
51  
52 and are assigned a score of 1 if answer is right, otherwise a score of 0. Therefore, the total scores  
53  
54 ranged from 0 to 25, with a higher score representing better knowledge about the elderly. Chinese  
55  
56  
57  
58  
59  
60

1  
2  
3  
4 language version of FAQ 1 introduced by Wang and his colleagues was found to possess adequate  
5  
6 reliability (Cronbach's  $\alpha=0.68$ )<sup>23</sup>.  
7

8  
9 KAOP, developed by Kogan in 1961, has been used to measure attitude toward the aged in many  
10  
11 studies. This scale contains 34-item with 17 negative (KAOP-) and 17 (KAOP+) positive statement,  
12  
13 for example, "most the elderly gets set in their ways and are unable to change", and "it is very easy  
14  
15 to get on with the elderly". Each item in scale adopted 6-point Likert (strongly disagree = 1, disagree  
16  
17 = 2, slightly disagree = 3, slightly agree = 5, and strongly agree = 6). The scores on the statement  
18  
19 presented negatively had to be reversed in order to estimate the total score. The total scores for the  
20  
21 KAOP is from 34 to 204, with higher scores representing positive attitude toward the aged <sup>24</sup>. For  
22  
23 the Chinese version of KAOP, the Cronbach's alpha was 0.82 for the total scale, indicating it is a  
24  
25 fully reliable instrument<sup>25</sup>.  
26  
27  
28  
29  
30  
31

32  
33 GSE developed by Zhang and Schwarzer in 1995 is used widely to measure a general sense of  
34  
35 perceived self-efficacy <sup>26</sup>. The 10 items of the GSE are scored on a 4-point scale (not at all true=1,  
36  
37 hardly true=2, moderately true=3, exactly true=4) and yield scores that range from 10 to 40 with a  
38  
39 high score present indicating a greater self-efficacy. A Cronbach's alpha value of 0.89 for the  
40  
41 Chinese version of the GSE indicated this instrument tool has a high reliability for our study  
42  
43 population<sup>2</sup>.  
44  
45  
46  
47

48  
49 In the last part of the questionnaire, some closed-ended questions were design to collect some  
50  
51 information about background characteristics of participating caregivers and their work  
52  
53 environment. General demographic characteristics including age, gender and educational level were  
54  
55 investigated (Table 1). In addition, some questions about caregivers' work environment were also  
56  
57 asked. For examples, "how many years have you been working in this nursing home (work tenure)";  
58  
59  
60

1  
2  
3  
4 “is your nursing home public or private (ownership of nursing home); located in rural or urban  
5  
6 (work place)” (Table 1). Employment type of caregivers in Chinese nursing homes includes the  
7  
8 formal and informal employee. Formal employee means to be hired by the government and their  
9  
10 wage was paid by national finance. Informal employee refers to those caregivers who signed the  
11  
12 labor contract with nursing homes and their wage comes from the profits of the institution<sup>27</sup>. Also,  
13  
14 we captured the information on pre-job training (yes/no), interest in working with the aged (yes/no)  
15  
16 and job satisfaction (not /generally /very satisfied) (Table 1). Meanwhile, we measured perceived  
17  
18 health status of the elderly from caregivers by asking “how rate overall health status of the elderly  
19  
20 you served in the past month (complete/partial/with no disability)?” (Table 1). These were identified  
21  
22 as independent variables in the regression model based on previous studies<sup>15 28 29</sup>.  
23  
24  
25  
26  
27  
28  
29  
30  
31

### 32 **Data analysis**

33  
34  
35 A score on each item of FAQ 1, KAOP and GSE were added up, respectively. According to the  
36  
37 guidance on use of each scale, every item was given a same weight<sup>23 26 30</sup>. Then, an average score  
38  
39 was calculated to evaluate the level of knowledge, attitude and self-efficacy.  
40  
41

42  
43 Since Kolmogorov-Smirnov (K-S) test showed *p*-value for knowledge, attitude and self-efficacy  
44  
45 scores exceeded 0.10, the data of these three variables were normally distributed. Student’s t-tests  
46  
47 (for two-group comparisons) or analysis of variance (for multiple-group comparisons) were  
48  
49 performed to test the statistical differences in these scores across the different groups. Then,  
50  
51 multivariable linear regression models were established to identify the factors associated with  
52  
53 knowledge, attitude and self-efficacy scores serving the characteristics of respondents as  
54  
55 independent variables. We used the ENTER approach in the modelling, with a *p* value of less than  
56  
57  
58  
59  
60

0.05 being considered as statistically significant. We also conducted logistic regression analyses for sensitivity test by recoding the knowledge, attitude and self-efficiency scores into dichotomous variables (using average values as a cut-off point).

A double entry strategy was adopted to ensure the accuracy of data input by using the EpiData 3.1.

All statistical analyses were performed using IBM SPSS Statistics V.22.0.

### **Patient and Public Involvement**

Because this study focused on knowledge about aging, attitude toward the elderly and self-efficacy, patients were not directly involved in the survey.

## **Results**

### **Characteristics of respondents**

Of the 403 respondents, 89.8% were the female. 70.5% of respondents aged more than 40. Only 20.3% of caregivers in our study have completed bachelor degree or above. More than half of respondents had work tenure of less than 3 years (55.1%) and worked in the urban setting (61.8%).

The majority (86.8%) was employed as informal employee. Only 10.7% earned a monthly income more than 3000 Chinese yuan. 68.0% and 85.4% of respondents reported they received pre-job training and had an interest in elderly care, respectively (Table 1).

### **Knowledge, attitude toward the elderly and self-efficacy**

Overall, a relatively low of knowledge ( $10.42 \pm 2.79$ ), attitude ( $127.85 \pm 14.36$ ) and self-efficacies ( $27.12 \pm 4.91$ ) scores measured by FAQ 1, KAOP and GSE respectively were observed among elderly caregivers in nursing homes.

Table 1 showed the differences in scores of knowledge, attitude and self-efficacy rated by caregivers

with different characteristics. Male respondents gave a higher score on attitude than the female ( $p<0.05$ ). The caregivers with an older age showed a greater self-efficacy compared to younger population ( $p<0.05$ ). Those respondents with middle educational level gave a higher score on knowledge than other two groups ( $p<0.05$ ). In addition, a high score on knowledge and attitude was presented among caregivers working in public NH ( $p<0.05$ ). Formal employee showed a better performance on knowledge, attitude and self-efficacy ( $p<0.05$ ). Scores of attitudes increased with a rise of monthly salary ( $p<0.001$ ). Those who received pro-job training reported a higher score on knowledge and self-efficacy ( $p<0.05$ ). Higher scores on attitude and self-efficacy were given by respondents with an interest in elderly care ( $p<0.05$ ). Scores on all three domains varied across different level of job satisfaction ( $p<0.05$ ).

Table 1 differences in scores of knowledge, attitude and self-efficacy among different characteristics caregivers

| Variables                | N ( % )                                  | FAQ 1 scores     |                 | KAOP scores        |                 | Self-efficacy scores |                 |
|--------------------------|------------------------------------------|------------------|-----------------|--------------------|-----------------|----------------------|-----------------|
|                          |                                          | Mean $\pm$ SD    | <i>p</i> -value | Mean $\pm$ SD      | <i>p</i> -value | Mean $\pm$ SD        | <i>p</i> -value |
| <b>Gender</b>            |                                          |                  | 0.055           |                    | 0.034           |                      | 0.890           |
|                          | Male 41 ( 10.2 )                         | 11.22 $\pm$ 3.09 |                 | 132.30 $\pm$ 15.75 |                 | 27.02 $\pm$ 4.21     |                 |
|                          | Female 362 ( 89.8 )                      | 10.33 $\pm$ 2.75 |                 | 127.31 $\pm$ 14.13 |                 | 27.13 $\pm$ 4.98     |                 |
| <b>Age(years)</b>        |                                          |                  | 0.070           |                    | 0.909           |                      | 0.004           |
|                          | 30-39 119 ( 29.5 )                       | 10.37 $\pm$ 2.70 |                 | 128.22 $\pm$ 14.13 |                 | 26.33 $\pm$ 4.19     |                 |
|                          | 40-49 141 ( 35.0 )                       | 10.83 $\pm$ 2.96 |                 | 127.93 $\pm$ 15.07 |                 | 26.70 $\pm$ 5.41     |                 |
|                          | 50 $\leq$ 143 ( 35.5 )                   | 10.07 $\pm$ 2.66 |                 | 127.45 $\pm$ 13.93 |                 | 28.18 $\pm$ 4.79     |                 |
| <b>Educational level</b> |                                          |                  | 0.046           |                    | 0.276           |                      | 0.927           |
|                          | Junior high school or below 225 ( 55.8 ) | 10.23 $\pm$ 2.90 |                 | 126.93 $\pm$ 13.78 |                 | 27.09 $\pm$ 4.83     |                 |



|                                  |                          |              |            |              |            |       |
|----------------------------------|--------------------------|--------------|------------|--------------|------------|-------|
|                                  | Secondary high school    | 96 ( 23.8 )  | 11.04±2.77 | 129.72±14.08 | 27.03±5.20 |       |
|                                  | Bachelor degree or above | 82 ( 20.3 )  | 10.23±2.44 | 128.16±16.11 | 27.30±4.81 |       |
| <b>Work tenure (years)</b>       |                          |              |            | 0.858        | 0.172      | 0.355 |
|                                  | 1-3                      | 222 ( 55.1 ) | 10.47±2.87 | 129.70±15.43 | 27.44±5.02 |       |
|                                  | 4-6                      | 114 ( 28.3 ) | 10.44±2.81 | 128.55±10.61 | 26.76±4.64 |       |
|                                  | 7≤                       | 67 ( 16.6 )  | 10.25±2.53 | 126.68±14.72 | 26.68±4.96 |       |
| <b>Ownership of nursing home</b> |                          |              |            | 0.033        | 0.032      | 0.708 |
|                                  | Public                   | 132 ( 32.8 ) | 14.24±2.99 | 133.94±15.91 | 26.99±4.61 |       |
|                                  | Private                  | 271 ( 67.2 ) | 10.51±2.69 | 127.80±13.58 | 27.18±5.05 |       |
| <b>Work place</b>                |                          |              |            | 0.127        | 0.862      | 0.296 |
|                                  | Urban                    | 249 ( 61.8 ) | 10.26±2.84 | 127.94±15.20 | 27.32±4.96 |       |
|                                  | Rural                    | 154 ( 38.2 ) | 10.69±2.71 | 127.69±12.95 | 26.78±4.82 |       |
| <b>Employment type</b>           |                          |              |            | 0.037        | 0.011      | 0.042 |
|                                  | Informal employee        | 350 ( 86.8 ) | 10.24±2.81 | 127.05±14.20 | 25.33±4.47 |       |
|                                  | Formal employee          | 53 ( 13.2 )  | 15.40±2.56 | 135.63±15.96 | 27.66±5.22 |       |
| <b>Monthly income (¥)</b>        |                          |              |            | 0.466        | <0.001     | 0.975 |
|                                  | < 2000                   | 160 ( 39.7 ) | 10.21±2.81 | 126.52±15.21 | 27.05±5.24 |       |
|                                  | 2000-3000                | 200 ( 49.6 ) | 10.56±2.74 | 127.13±12.71 | 27.16±4.91 |       |
|                                  | > 3000                   | 43 ( 10.7 )  | 10.60±3.00 | 136.11±15.59 | 27.18±3.51 |       |
| <b>Pre-job training</b>          |                          |              |            | 0.040        | 0.106      | 0.001 |
|                                  | No                       | 129 ( 32.0 ) | 10.01±2.95 | 126.16±14.38 | 25.91±4.62 |       |
|                                  | Yes                      | 274 ( 68.0 ) | 10.62±2.70 | 128.64±14.31 | 27.69±4.94 |       |

|                                          |              |            |              |            |       |        |
|------------------------------------------|--------------|------------|--------------|------------|-------|--------|
| <b>The health status of the elderly</b>  |              |            |              | 0.868      | 0.602 | <0.001 |
| Complete disability                      | 34 ( 8.4 )   | 10.21±2.21 | 125.49±14.11 | 26.32±4.34 |       |        |
| Partial disability                       | 219 ( 54.3 ) | 10.42±2.79 | 127.98±13.50 | 27.62±5.17 |       |        |
| No disability                            | 150 ( 37.2 ) | 10.49±2.92 | 128.19±15.63 | 30.64±5.41 |       |        |
| <b>Interest in working with the aged</b> |              |            |              | 0.273      | 0.019 | 0.022  |
| No                                       | 58 ( 14.4 )  | 9.88±2.72  | 123.74±14.15 | 25.68±4.66 |       |        |
| Yes                                      | 344 ( 85.4 ) | 10.51±2.80 | 128.60±14.28 | 27.34±4.91 |       |        |
| <b>Job Satisfaction</b>                  |              |            |              | 0.001      | 0.033 | 0.001  |
| Not satisfied                            | 34 ( 8.4 )   | 8.68±2.77  | 121.97±16.80 | 25.14±5.42 |       |        |
| Generally satisfied                      | 151 ( 37.5 ) | 10.66±2.49 | 127.70±13.29 | 26.42±4.94 |       |        |
| Very satisfied                           | 218 ( 54.1 ) | 10.54±2.91 | 128.86±14.51 | 27.91±4.66 |       |        |

### Factors associated with knowledge, attitude and self-efficacy: results of multivariable linear regression analyses

Table 2 showed results of three multivariable linear regression models to analyze factors associated with knowledge, attitude and self-efficacy.

#### Knowledge about older people

Respondents with bachelor degree or above ( $\beta=0.232$ , 95%CI: 0.827 to 0.907) gave a higher score in FAQ I than those only completing junior high school or below. People who received a pre-job training ( $\beta=0.196$ , 95% CI: 0.121 to 1.169) were more likely to report a higher score on knowledge.

Job satisfaction ( $\beta=0.358$ , 370, 95% CI: 0.123 to 1.875, 0.110 to 1.283) had a proportional relationship with the knowledge.

#### Attitudes towards older people

The attitude scores in KAOP were higher for those who were employed as formal employee ( $\beta = 0.136$ , 95%CI: 0.016 to 7.670), earned more wages ( $\beta = 0.214$ , 95%CI: 0.009 to 4.561), and had an interest in working with the aged ( $\beta = 0.191$ , 95%CI: 0.018 to 2.808), but the female ( $\beta = -0.112$ , 95%CI: -1.753 to -0.010) and respondents with more than 7 years' work experience ( $\beta = -0.130$ , 95%CI: -2.827 to -0.018) reported a low score.

### Self-efficacy of caregivers

A higher self-efficacy score in GSE was observed in caregivers who were older ( $\beta = 0.205$ , 95%CI: 0.039 to 3.427), received a pre-job training ( $\beta = 0.165$ , 95%CI: 0.053 to 2.934), had the interest in working with aged ( $\beta = 0.154$ , 95%CI: 0.004 to 2.085) and job satisfaction ( $\beta = 0.174$ , 95%CI: 0.026 to 3.548), and perceived a better health status of the elderly they served ( $\beta = 0.290$ , 0.447, 95%CI: 0.059 to 2.700, 0.053 to 1.211).

In addition, a moderate association<sup>31</sup> between knowledge and attitude scores ( $r = 0.233$ ,  $p < 0.05$ ), attitude and self-efficacy scores ( $r = 0.150$ ,  $p < 0.05$ ) was tested by Pearson correlation calculations. However, correlation coefficient between knowledge and self-efficacy was not statistically significant ( $r = 0.034$ ,  $p > 0.05$ ).

Table 2 Predictors of knowledge, attitude and self-efficacy: multivariable linear regression models

| Variables         | FAQ 1 scores |                 | KAOP scores |                  | Self-efficacy scores |                 |
|-------------------|--------------|-----------------|-------------|------------------|----------------------|-----------------|
|                   | $\beta$      | 95%CI           | $\beta$     | 95%CI            | $\beta$              | 95%CI           |
| <b>Gender</b>     |              |                 |             |                  |                      |                 |
| Male              | Ref.         |                 | Ref.        |                  | Ref.                 |                 |
| Female            | -0.082       | (-1.646, 0.176) | -0.112*     | (-1.753, -0.010) | 0.011                | (-1.269, 1.813) |
| <b>Age(years)</b> |              |                 |             |                  |                      |                 |

1  
2  
3  
4  
5  
6  
7  
8  
9  
10  
11  
12  
13  
14  
15  
16  
17  
18  
19  
20  
21  
22  
23  
24  
25  
26  
27  
28  
29  
30  
31  
32  
33  
34  
35  
36  
37  
38  
39  
40  
41  
42  
43  
44  
45  
46  
47  
48  
49  
50  
51  
52  
53  
54  
55  
56  
57  
58  
59  
60

|                                  |                             |        |                 |         |                  |        |                 |
|----------------------------------|-----------------------------|--------|-----------------|---------|------------------|--------|-----------------|
|                                  | 30-39                       | Ref.   |                 | Ref.    |                  | Ref.   |                 |
|                                  | 40-49                       | 0.110  | (-0.143, 1.345) | -0.017  | (-4.468, 3.125)  | 0.095  | (-0.363, 2.153) |
|                                  | 50≤                         | -0.018 | (-0.961, 0.629) | -0.043  | (-5.362, 2.750)  | 0.205* | (0.039, 3.427)  |
| <b>Education level</b>           |                             |        |                 |         |                  |        |                 |
|                                  | Junior high school or below | Ref.   |                 | Ref.    |                  | Ref.   |                 |
|                                  | Secondary high school       | 0.102  | (-0.020, 1.410) | 0.076   | (-1.217, 6.078)  | 0.015  | (-1.086, 1.331) |
|                                  | Bachelor degree or above    | 0.232* | (0.027, 0.907)  | -0.013  | (-5.121, 3.721)  | 0.023  | (-1.313, 1.617) |
| <b>Working tenure(years)</b>     |                             |        |                 |         |                  |        |                 |
|                                  | 1-3                         | Ref.   |                 | Ref.    |                  | Ref.   |                 |
|                                  | 4-6                         | -0.005 | (-0.642, 0.620) | 0.094   | (-0.389, 6.053)  | -0.089 | (-2.105, 0.029) |
|                                  | 7≤                          | -0.056 | (-1.131, 0.421) | -0.130* | (-2.827, -0.018) | -0.048 | (-2.146, 0.478) |
| <b>Ownership of nursing home</b> |                             |        |                 |         |                  |        |                 |
|                                  | Public                      | Ref.   |                 | Ref.    |                  | Ref.   |                 |
|                                  | Private                     | 0.032  | (-0.417, 0.770) | -0.001  | (-2.827, 3.227)  | 0.057  | (-0.308, 1.698) |
| <b>Work place</b>                |                             |        |                 |         |                  |        |                 |
|                                  | Urban                       | Ref.   |                 | Ref.    |                  | Ref.   |                 |
|                                  | Rural                       | 0.054  | (-0.155, 0.987) | -0.022  | (-3.617, 2.211)  | -0.003 | (-0.993, 0.939) |
| <b>Employment type</b>           |                             |        |                 |         |                  |        |                 |
|                                  | Informal employee           | Ref.   |                 | Ref.    |                  | Ref.   |                 |
|                                  | Formal employee             | 0.109  | (-0.035, 1.150) | 0.136*  | (0.016, 7.670)   | 0.102  | (-1.313, 0.689) |
| <b>Monthly income (¥)</b>        |                             |        |                 |         |                  |        |                 |
|                                  | < 2000                      | Ref.   |                 | Ref.    |                  | Ref.   |                 |

|                                          |                                |         |                 |         |                 |         |                 |
|------------------------------------------|--------------------------------|---------|-----------------|---------|-----------------|---------|-----------------|
|                                          | 2000-3000                      | 0.015   | (-0.461, 0.752) | -0.004  | (-3.610, 2.578) | 0.014   | (-1.050, 1.001) |
|                                          | > 3000                         | 0.036   | (-0.742, 1.221) | 0.214** | (0.009, 4.561)  | -0.004  | (-1.890, 1.429) |
| <b>Pre-job training</b>                  |                                |         |                 |         |                 |         |                 |
|                                          | No                             | Ref.    |                 | Ref.    |                 | Ref.    |                 |
|                                          | Yes                            | 0.196*  | (0.121, 1.169)  | 0.056   | (-1.301, 5.280) | 0.165*  | (0.053, 2.934)  |
| <b>The health status of the elderly</b>  |                                |         |                 |         |                 |         |                 |
|                                          | Complete disability            | Ref.    |                 | Ref.    |                 | Ref.    |                 |
|                                          | Partial disability             | 0.001   | (-1.032, 0.994) | 0.114   | (-1.885, 8.457) | 0.447** | (0.059, 2.700)  |
|                                          | No disability                  | 0.010   | (-1.069, 1.026) | 0.084   | (-2.931, 7.759) | 0.290*  | (0.053, 1.211)  |
| <b>Interest in working with the aged</b> |                                |         |                 |         |                 |         |                 |
|                                          | No                             | Ref.    |                 | Ref.    |                 | Ref.    |                 |
|                                          | Yes                            | 0.080   | (-0.358, 1.230) | 0.191*  | (0.018, 2.808)  | 0.154*  | (0.004, 2.085)  |
| <b>Job Satisfaction</b>                  |                                |         |                 |         |                 |         |                 |
|                                          | Not satisfied                  | Ref.    |                 | Ref.    |                 | Ref.    |                 |
|                                          | Generally satisfied            | 0.358** | (0.123, 1.875)  | 0.081   | (-0.293, 7.808) | 0.052   | (-1.103, 2.469) |
|                                          | Very satisfied                 | 0.370** | (0.110, 1.283)  | 0.109   | (-2.508, 8.275) | 0.174*  | (0.026, 3.548)  |
|                                          | <i>F</i>                       | 2.378** |                 | 2.344*  |                 | 3.740** |                 |
|                                          | <i>R</i> <sup>2</sup>          | 0.116   |                 | 0.114   |                 | 0.171   |                 |
|                                          | Adjusted <i>R</i> <sup>2</sup> | 0.105   |                 | 0.109   |                 | 0.155   |                 |

Note \*  $p < 0.05$ ; \*\*  $p < 0.001$

## Discussion

With an accelerated increase in elderly population, meeting the increasing needs for professional

1  
2  
3  
4 aged healthcare poses a great challenge for Chinese government. This study assessed the knowledge,  
5  
6 attitude about the aging and self-efficacy of elderly caregivers working in Chinese NHs. In  
7  
8  
9 comparison to other countries or regions<sup>28 30 32</sup>, a much lower level of knowledge, attitude and self-  
10  
11 efficacy were observed. At initial stage of NHs development in China, a severe shortage of qualified  
12  
13 health workers and insufficient professional training resulted in the majority of caregivers  
14  
15 experienced difficulties in providing healthcare services for the elderly<sup>3</sup>. Additionally, a lower  
16  
17 income and negative expectations for career development also created an adverse impact on their  
18  
19 work performance<sup>33</sup>.  
20  
21  
22  
23

24  
25 Consistent with other studies<sup>18 30 34</sup>, the results found the caregivers who received a higher level  
26  
27 education and pro-job training gave a high score on knowledge about the elderly. A possible reason  
28  
29 is that long-term education and professional training not only improved their working ability, but  
30  
31 can teach more knowledge and further correct misunderstanding about aging. In addition to these  
32  
33 two factors, the high-level job satisfaction was also found to be associated with knowledges due to  
34  
35 the fact that this driving force factor can encourage staff to learn more in relation to their works  
36  
37 demonstrated in other study<sup>35</sup>.  
38  
39  
40  
41

42  
43 With respect to attitude toward the elderly, this study indicated the female were more likely to have  
44  
45 a negative attitude comparing with male, which was inconsistent with other studies<sup>15 36</sup>. The  
46  
47 potential explanation is the burden that women in Chinese traditional family take more  
48  
49 responsibilities for cultivating the children and taking care of old people resulted in female  
50  
51 caregivers developing bad attitudes. Additionally, previous study indicated gender discrimination  
52  
53 in the workplace often resulted in unequal treatment for the female in terms of wages and career  
54  
55 advancement<sup>37 38</sup>. Therefore, it is expected that the female caregivers tend to hold an adverse attitude.  
56  
57  
58  
59  
60

1  
2  
3  
4 Work tenure was associated negatively with attitudes can be explained by the fact long-term work  
5  
6 in the same position can increase burnout<sup>39</sup>, thus resulting in negative emotion to works.  
7

8  
9 Similar to other study<sup>40</sup>, those employed as formal staff had a positive attitude toward the elderly  
10  
11 than informal one. This finding is mainly related to the unequal salary system in Chines NHs. Due  
12  
13 to the fact that wages of formal employee were paid by government revenues, this part of people  
14  
15 often obtain more benefits (such as social insurances) than others, whereas they finished the same  
16  
17 works<sup>41</sup>. Therefore, it should be acknowledged that such unfair payback for informal staff explains  
18  
19 their negative attitudes towards works. Similarly, the finding that KAOP scores increased with a  
20  
21 rise of income also reflects the important role of economic factor in improving work enthusiasm  
22  
23 and performance of caregivers<sup>42</sup>. Moreover, caregivers with interests in working with the aged  
24  
25 tended to hold positive attitudes. A possible explanation is a good interest in their job can alleviate  
26  
27 the perceived work stress and further reduce prejudice against the elderly<sup>43 44</sup>.  
28  
29

30  
31 The present study found that the age of caregivers, in line with previous study, had a positive  
32  
33 relationship with self-efficacy<sup>45</sup>. The older age often means an increase in life and work experiences,  
34  
35 and accordingly improved people's beliefs about their capabilities. Naturally, those received a pro-  
36  
37 job training are expected to possess an improved work skill in handling workload and overcoming  
38  
39 obstacles, which therefore enhances self-perception on personal efficacy<sup>46</sup>.  
40  
41

42  
43 The perceived health status of the aged from caregivers is also responsible for variation of self-  
44  
45 efficacy scores. Understandably, providing services for the old adults without disability represents  
46  
47 a reduced difficulty for caregivers in comparison to the disabled<sup>47</sup>. Thus, this group are more likely  
48  
49 to perceive a high-level self-efficiency. Meanwhile, the finding on a positive association of self-  
50  
51 efficiency with interest in working with the old and high-level job satisfaction indicated these factors  
52  
53  
54  
55  
56  
57  
58  
59  
60

1  
2  
3  
4 are able to evoke enthusiastic attitudes toward works, and thereby improving self-confidences in  
5  
6 coping with work difficulties.  
7

8  
9 Actually, the positive correlations among knowledge, attitude and self-efficacy presented in this  
10  
11 study agrees with “knowledge-attitude-practice (KAP)” theory<sup>48 49</sup>. Knowing a right knowledge  
12  
13 about aging is beneficial for caregivers to develop an optimistic attitude toward the old people<sup>48</sup>.  
14  
15 Accordingly, a positive attitude is also good for the improvement of people's beliefs about their  
16  
17 capabilities<sup>49</sup>. Therefore, these closed connections provided an implication that the effective  
18  
19 workforce management for caregivers should take knowledge, attitude and self-efficacy into  
20  
21 account synthetically.  
22  
23  
24  
25  
26  
27  
28  
29

### 30 **Limitation**

31  
32 There are some limitations in this study should be mentioned. Firstly, 403 sample sizes from  
33  
34 Liaoning province in present study were limited to reflect comprehensive situation of China, despite  
35  
36 it is enough for data analysis. Caution needs to be taken when generalizing the findings. Additionally,  
37  
38 exploratory variables in this study mainly contained demographics and working environment  
39  
40 characteristics of caregivers despite the selection of these variables was supported by literature and  
41  
42 interviews. However, institutional-level factors potentially influencing perceptions of caregivers,  
43  
44 such as the number of employees and elderly in NHs, were not selected since the data is not available.  
45  
46 It also explains why the  $R^2$  of regression models is relatively low. Therefore, a further study covering  
47  
48 factors at different levels can be considered. Finally, readers should be aware that participants may  
49  
50 report what they think the researcher wants to know rather than the truth by using a self-reporting  
51  
52 questionnaire, which resulted in their responses can be idealized to meet socially acceptable norms.  
53  
54  
55  
56  
57  
58  
59  
60



## Conclusion

This study sheds some light on caregivers-perceived knowledge, attitude about the elderly and self-efficacy in Chinese NHs, and identify their associated the characteristics and work environment factors. A relatively poor-level knowledge, attitude and self-efficacy suggest some targeted actions should be placed on improvement of these attributes.

Firstly, professional training for aged care should be conducted to improving knowledge and abilities of elderly caregivers. Secondly, a performance-based pay system can be considered to encourage caregivers to develop a positive attitude. For example, old people's satisfaction with service can be used as a performance evaluation indicator; an equal payment system for informal and formal employee should be designed. Thirdly, fostering an interest in working with the elderly can also be taken into account. For instance, opening nursing curricula for caregivers to diminish misconceptions about aging and emphasize the potential for job satisfaction arising from working with older people.

## Ethics approval and consent to participate

Our study was approved by the ethics committee of Jinzhou Medical University (JMU00001078-15088)

## Consent for publication

Consent for publication was obtained from persons we investigated in this study.

## Availability of data and material

The data sets analyzed during this study are available from the corresponding author on reasonable

1  
2  
3  
4 request

5  
6  
7 **Competing interests**

8  
9 The authors declare that they have no competing interests.

10  
11  
12 **Funding**

13  
14 This work was supported by Liaoning Provincial Social Science Project (NO.2019lslktyb-067)

15  
16  
17 **Authors' contributions**

18  
19 All authors made significant contributions to the study. HZ conceptualized this study and analyzed  
20 the data. Moreover, she wrote the first draft of the manuscript. HS interpreted the results and revised  
21 the manuscript. The final version submitted for publication was read and approved by all authors.

22  
23  
24  
25  
26  
27 **Acknowledgements**

28  
29 The authors gratefully acknowledge all interviewees participating in this study.

30  
31  
32  
33  
34  
35 **Reference**

- 36  
37  
38 1. Wu M, Li SX, Zhang NJ, et al. Nursing home research in Jinan, China: a focus group  
39 approach. *International Journal of Public Policy* 2012;1(8):21-30.  
40  
41  
42  
43 2. Fua F, Lianga Y, Anb Y, et al. Self-efficacy and psychological well-being of nursing home  
44 residents in China: the mediating role of social engagement. *Asia Pacific Journal of*  
45  
46  
47  
48  
49  
50  
51 3. Song Y, Anderson RA, Corazzini KN, et al. Staff characteristics and care in Chinese nursing  
52 homes: A systematic literature review. *International Journal of Nursing Sciences*  
53  
54  
55  
56  
57  
58  
59 4. Chan YK, Lee RPL. Network Size, Social Support and Happiness in Later Life: A  
60

- 1  
2  
3  
4 Comparative Study of Beijing and Hong Kong. *Journal of Happiness Studies*  
5  
6 2006;7(1):87-112.  
7  
8  
9 5. Wong YC, Leung J. Long-term care in China: issues and prospects. *J Gerontol Soc Work*  
10  
11 2012;55(7):570-86.  
12  
13  
14 6. Zhan HJ. Population Aging and Long-Term Care in China. *Generations* 2013;37(1):53-58.  
15  
16  
17 7. Hao Q, Wu S, Ying L, et al. Current dilemmas of nursing homes in Chengdu: a cross-sectional  
18  
19 survey. *Journal of the American Medical Directors Association* 2012;13(4):406.e9-  
20  
21 06.e12.  
22  
23  
24 8. Feng Z, Liu C, Guan X, et al. China's Rapidly Aging Population Creates Policy Challenges  
25  
26 In Shaping A Viable Long-Term Care System. *Health Affairs* 2012;31(12):2764-73.  
27  
28  
29 9. Zhang H. Who will care for our parents? Changing boundaries of family and public roles in  
30  
31 providing care for the aged in urban China. *Care Management Journals* 2007;8(1):1-  
32  
33 10.  
34  
35  
36  
37 10. Lee AC, Wong AK, Loh EK. Score in the Palmore's Aging Quiz, knowledge of community  
38  
39 resources and working preferences of undergraduate nursing students toward the  
40  
41 elderly in Hong Kong. *Nurse Educ Today* 2006;26(4):269-76.  
42  
43  
44  
45 11. Fagerberg I, Ekman S-L. Caring for elderly patients: a longitudinal study of Swedish nursing  
46  
47 students' narratives. *Health Care in Later Life* 1998(3):258-71.  
48  
49  
50 12. Kim O-N, Oh J-w, Kim Y-S, et al. Impacts of Perceived Health Status and Self-efficacy in  
51  
52 Hospital Nurses on their Health Promoting Behaviors. *Advances in information*  
53  
54 *Sciences and Service Sciences* 2014;6(11):139-44.  
55  
56  
57  
58 13. Bandura A. Perceived Self-Efficacy in Cognitive Development and Functioning 1993.  
59  
60

- 1  
2  
3  
4 14. Chris G. Stress, coping and burn-out in nursing students. *International Journal of Nursing*  
5  
6 *Studies* 2010;47(10):1299-309.  
7  
8  
9 15. Hweidi IM, Alhassan MA. Jordanian nurses' attitudes toward older patients in acute care  
10  
11 settings. *International Nursing Review* 2010;52(3):225-32.  
12  
13  
14 16. Gallagher S, Bennett KM, Halford JC. A comparison of acute and long-term health-care  
15  
16 personnel's attitudes towards older adults. *International Journal of Nursing Practice*  
17  
18 2010;12(5):273-79.  
19  
20  
21  
22 17. Jacelon CS. Attitudes and behaviors of hospital staff toward elders in an acute care setting  
23  
24 *Applied Nursing Research* 2002;15(4):227-34.  
25  
26  
27 18. Yenişehir S, Karakaya MG. Knowledge and practice of nursing home caregivers about  
28  
29 urinary incontinence. *European Geriatric Medicine* 2019;10(1):99-105.  
30  
31  
32 19. Network CY. The growth rate of the elderly population in Liaoning Province slowed down in  
33  
34 2017, and the population of young and old people increased rapidly. 2017 [Available  
35  
36 from:  
37  
38 [https://sh.qihoo.com/9715f9adce7664579?cota=1&refer\\_scene=so\\_1&sign=360\\_e39](https://sh.qihoo.com/9715f9adce7664579?cota=1&refer_scene=so_1&sign=360_e39369d1)  
39  
40 [369d1](https://sh.qihoo.com/9715f9adce7664579?cota=1&refer_scene=so_1&sign=360_e39369d1).  
41  
42  
43  
44  
45 20. P Peduzzi , J Concato , Feinstein A. Importance of events per independent variable in  
46  
47 proportional hazards regression analysis. II. Accuracy and precision of regression  
48  
49 estimates. *Journal of Clinical Epidemiology* 2007;30(4):618-26.  
50  
51  
52  
53 21. Peduzzi, Peter Concato, Kemper J. A Simulation Study of the Number of Events per  
54  
55 Variable in Logistic Regression Analysis. *Journal of Clinical Epidemiology*  
56  
57 1996;49(12):1373-9.  
58  
59  
60

- 1  
2  
3  
4 22. Kane RL. Ageism: Negative and Positive 2nd Edition. *Journal of Public Health Policy*  
5  
6 2000;21(2):247-49.  
7  
8  
9 23. Wang CC, Liao WP, Yuan SC, et al. The Chinese version of the Facts on Aging Quiz scale:  
10  
11 reliability and validity assessment. *International Journal of Nursing Studies*  
12  
13 2010;47(6):742-52.  
14  
15  
16 24. Wang CC, Liao WC, Kao MC, et al. Taiwanese medical and nursing student interest levels  
17  
18 in and attitudes towards geriatrics. *Annals of the Academy of Medicine Singapore*  
19  
20 2009;38(3):230.  
21  
22  
23 25. Yen CH, Liao WC, Chen YR, et al. A Chinese version of Kogan's Attitude Toward Older  
24  
25 People Scale: reliability and validity assessment. *International Journal of Nursing*  
26  
27 *Studies* 2009;46(1):38-44.  
28  
29  
30 26. Schwarzer R, Bäßler J, Kwiatek P, et al. The assessment of optimistic self-beliefs:  
31  
32 Comparison of the German, Spanish, and Chinese versions of the General Self-  
33  
34 efficacy Scale. *Applied Psychology* 2010;46(1):69-88.  
35  
36  
37 27. Fang LC. Informal employment and gender implications in China: the nature of work and  
38  
39 employment relations in the community services sector. *International Journal of Human*  
40  
41 *Resource Management* 2006;17(8):1471-87.  
42  
43  
44 28. Doherty M, Mitchell EA, O'Neill S. Attitudes of Healthcare Workers towards Older People in  
45  
46 a Rural Population: A Survey Using the Kogan Scale. *Nursing Research & Practice*  
47  
48 2011;2011(1):352627.  
49  
50  
51 29. Hu SH, Yu YM, Chang WY, et al. Social support and factors associated with self-efficacy  
52  
53 among acute-care nurse practitioners. *Journal of Clinical Nursing* 2017;27(2):876-82.  
54  
55  
56  
57  
58  
59  
60

- 1  
2  
3  
4 30. Lambrinou E, Sourtzi P, Kalokerinou A, et al. Attitudes and knowledge of the Greek nursing  
5  
6 students towards older people. *Nurse Educ Today* 2009;29(6):617-22.  
7  
8  
9 31. Benesty J, Chen J, Huang Y, et al. Pearson Correlation Coefficient. In: Cohen I, Huang Y,  
10  
11 Chen J, et al., eds. *Noise Reduction in Speech Processing*. Berlin, Heidelberg: Springer  
12  
13 Berlin Heidelberg 2009:1-4.  
14  
15  
16 32. Tierney AJ, Lewis SJ, Vallis J. Nurses' knowledge and attitudes towards older patients  
17  
18 admitted to acute orthopaedic wards. *Journal of Orthopaedic Nursing* 1998;2(2):67-75.  
19  
20  
21 33. Gaugler JE, Mittelman MS, Hepburn K, et al. Predictors of change in caregiver burden and  
22  
23 depressive symptoms following nursing home admission. *Psychol Aging*  
24  
25 2009;24(2):385-96.  
26  
27  
28 34. Scerri A, Scerri C. Nursing students' knowledge and attitudes towards dementia — A  
29  
30 questionnaire survey. *Nurse Education Today* 2013;33(9):962-68.  
31  
32  
33 35. Humphris GM, Turner A. Job satisfaction and attitudes of nursing staff on a unit for the  
34  
35 elderly severely mentally infirm, with change of location. *Journal of Advanced Nursing*  
36  
37 1989;14(4):298.  
38  
39  
40 36. Sung KT. Respect for Elders: Myths and Realities in East Asia. *Journal of Aging & Identity*  
41  
42 2000;5(4):197-205.  
43  
44  
45 37. Zhou X, Zhang J, Song X. Gender Discrimination in Hiring: Evidence from 19,130 Resumes  
46  
47 in China. *Mpra Paper* 2013  
48  
49  
50 38. Shaffer MA, Joplin JRW, Bell MP, et al. Gender Discrimination and Job-Related Outcomes:  
51  
52 A Cross-Cultural Comparison of Working Women in the United States and China ☆  
53  
54 ☆☆. *Journal of Vocational Behavior* 2000;57(3):395-427.  
55  
56  
57  
58  
59  
60

- 1  
2  
3  
4 39. Lamb HR. Staff burnout in work with long-term patients. *Hospital & Community Psychiatry*  
5  
6 1979;30(6):396-8.  
7  
8  
9 40. P S. Interactions of nurses with elderly patients: relationship to nurses' attitudes and to  
10  
11 formal activity periods. *Journal of Advanced Nursing* 2010;18(1):14-19.  
12  
13  
14 41. Zuo H. Formal and Informal Employment in China: Probability of Employment and  
15  
16 Determinants of Monthly Wages. *Australian Economic Review* 2013;46(4):405-23.  
17  
18  
19 42. Idrees Z, Xinping X, Shafi K, et al. Effect of salary, training and motivation on job  
20  
21 performance of employees. *American Journal of Business, Economics and*  
22  
23 *Management* 2015;3(2):55-58.  
24  
25  
26  
27 43. Undergraduate Nursing Students and the Elderly: an Assessment of Attitudes in a Turkish  
28  
29 University. Apha Meeting and Exposition; 2017.  
30  
31  
32 44. Monnot MJ, Beehr TA. Subjective well-being at work: Disentangling source effects of stress  
33  
34 and support on enthusiasm, contentment, and meaningfulness. *Journal of Vocational*  
35  
36 *Behavior* 2014;85(2):204-18.  
37  
38  
39  
40 45. Li J, He Z, Luo Y, et al. Perceived Transcultural Self-Efficacy of Nurses in General Hospitals  
41  
42 in Guangzhou, China. *Nursing Research* 2016;65(5):371-79.  
43  
44  
45 46. Hendrix CC, Landerman R, Abernethy AP. Effects of an individualized caregiver training  
46  
47 intervention on self-efficacy of cancer caregivers. *West J Nurs Res* 2013;35(5):590-  
48  
49 610.  
50  
51  
52  
53 47. Uysal A, Albayrak B, Koçulu B, et al. Attitudes of nursing students toward people with  
54  
55 disabilities. *Nurse Educ Today* 2014;34(5):878-84.  
56  
57  
58 48. Howell D, Butler L, Vincent L, et al. Influencing nurses' knowledge, attitudes, and practice  
59  
60

1  
2  
3  
4  
5  
6  
7  
8  
9  
10  
11  
12  
13  
14  
15  
16  
17  
18  
19  
20  
21  
22  
23  
24  
25  
26  
27  
28  
29  
30  
31  
32  
33  
34  
35  
36  
37  
38  
39  
40  
41  
42  
43  
44  
45  
46  
47  
48  
49  
50  
51  
52  
53  
54  
55  
56  
57  
58  
59  
60

in cancer pain management. *Cancer Nursing* 2000;23(1):55.

49. Pan HH, Shih HL, Wu LF, et al. Path modeling of knowledge, attitude and practice toward palliative care consultation service among Taiwanese nursing staff: a cross-sectional study. *Bmc Palliative Care* 2017;16(1):42.

For peer review only



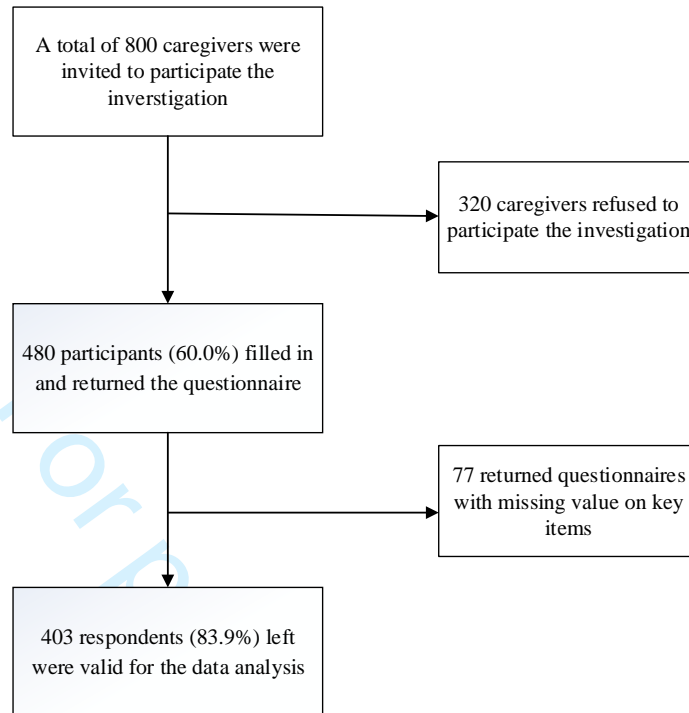

Figure 1 The process for sample screening

**STROBE 2007 (v4) Statement—Checklist of items that should be included in reports of *cross-sectional studies***

| Section/Topic                | Item # | Recommendation                                                                                                                                                                       | Reported on page # |
|------------------------------|--------|--------------------------------------------------------------------------------------------------------------------------------------------------------------------------------------|--------------------|
| <b>Title and abstract</b>    | 1      | (a) Indicate the study's design with a commonly used term in the title or the abstract                                                                                               | Page1              |
|                              |        | (b) Provide in the abstract an informative and balanced summary of what was done and what was found                                                                                  | Page2-3            |
| <b>Introduction</b>          |        |                                                                                                                                                                                      |                    |
| Background/rationale         | 2      | Explain the scientific background and rationale for the investigation being reported                                                                                                 | Page4-5            |
| Objectives                   | 3      | State specific objectives, including any prespecified hypotheses                                                                                                                     | Page5              |
| <b>Methods</b>               |        |                                                                                                                                                                                      |                    |
| Study design                 | 4      | Present key elements of study design early in the paper                                                                                                                              | Page5-6            |
| Setting                      | 5      | Describe the setting, locations, and relevant dates, including periods of recruitment, exposure, follow-up, and data collection                                                      | Page6              |
| Participants                 | 6      | (a) Give the eligibility criteria, and the sources and methods of selection of participants                                                                                          | Page6              |
| Variables                    | 7      | Clearly define all outcomes, exposures, predictors, potential confounders, and effect modifiers. Give diagnostic criteria, if applicable                                             | Page7              |
| Data sources/<br>measurement | 8*     | For each variable of interest, give sources of data and details of methods of assessment (measurement). Describe comparability of assessment methods if there is more than one group | Page7              |
| Bias                         | 9      | Describe any efforts to address potential sources of bias                                                                                                                            | Page6              |
| Study size                   | 10     | Explain how the study size was arrived at                                                                                                                                            | Page6              |
| Quantitative variables       | 11     | Explain how quantitative variables were handled in the analyses. If applicable, describe which groupings were chosen and why                                                         | Page7-8            |
| Statistical methods          | 12     | (a) Describe all statistical methods, including those used to control for confounding                                                                                                | Page8              |
|                              |        | (b) Describe any methods used to examine subgroups and interactions                                                                                                                  | Page8              |
|                              |        | (c) Explain how missing data were addressed                                                                                                                                          | Page6              |
|                              |        | (d) If applicable, describe analytical methods taking account of sampling strategy                                                                                                   | Not applicable     |
|                              |        | (e) Describe any sensitivity analyses                                                                                                                                                | Not applicable     |
| <b>Results</b>               |        |                                                                                                                                                                                      |                    |

|                          |     |                                                                                                                                                                                                              |                |
|--------------------------|-----|--------------------------------------------------------------------------------------------------------------------------------------------------------------------------------------------------------------|----------------|
| Participants             | 13* | (a) Report numbers of individuals at each stage of study—eg numbers potentially eligible, examined for eligibility, confirmed eligible, included in the study, completing follow-up, and analysed            | Page9-11       |
|                          |     | (b) Give reasons for non-participation at each stage                                                                                                                                                         | Not applicable |
|                          |     | (c) Consider use of a flow diagram                                                                                                                                                                           | Not applicable |
| Descriptive data         | 14* | (a) Give characteristics of study participants (eg demographic, clinical, social) and information on exposures and potential confounders                                                                     | Page9-11       |
|                          |     | (b) Indicate number of participants with missing data for each variable of interest                                                                                                                          | Not applicable |
| Outcome data             | 15* | Report numbers of outcome events or summary measures                                                                                                                                                         | Page9          |
| Main results             | 16  | (a) Give unadjusted estimates and, if applicable, confounder-adjusted estimates and their precision (eg, 95% confidence interval). Make clear which confounders were adjusted for and why they were included | Page 12-15     |
|                          |     | (b) Report category boundaries when continuous variables were categorized                                                                                                                                    | Not applicable |
|                          |     | (c) If relevant, consider translating estimates of relative risk into absolute risk for a meaningful time period                                                                                             | Not applicable |
| Other analyses           | 17  | Report other analyses done—eg analyses of subgroups and interactions, and sensitivity analyses                                                                                                               | Not applicable |
| <b>Discussion</b>        |     |                                                                                                                                                                                                              |                |
| Key results              | 18  | Summarise key results with reference to study objectives                                                                                                                                                     | Page15         |
| Limitations              | 19  | Discuss limitations of the study, taking into account sources of potential bias or imprecision. Discuss both direction and magnitude of any potential bias                                                   | Page17         |
| Interpretation           | 20  | Give a cautious overall interpretation of results considering objectives, limitations, multiplicity of analyses, results from similar studies, and other relevant evidence                                   | Page15-17      |
| Generalisability         | 21  | Discuss the generalisability (external validity) of the study results                                                                                                                                        | Page 18        |
| <b>Other information</b> |     |                                                                                                                                                                                                              |                |
| Funding                  | 22  | Give the source of funding and the role of the funders for the present study and, if applicable, for the original study on which the present article is based                                                | Page19         |

\*Give information separately for cases and controls in case-control studies and, if applicable, for exposed and unexposed groups in cohort and cross-sectional studies.

**Note:** An Explanation and Elaboration article discusses each checklist item and gives methodological background and published examples of transparent reporting. The STROBE checklist is best used in conjunction with this article (freely available on the Web sites of PLoS Medicine at <http://www.plosmedicine.org/>, Annals of Internal Medicine at <http://www.annals.org/>, and Epidemiology at <http://www.epidem.com/>). Information on the STROBE Initiative is available at [www.strobe-statement.org](http://www.strobe-statement.org).

# BMJ Open

## Knowledge, attitude and self-efficacy of elderly caregivers in Chinese nursing homes: a cross-sectional study in Liaoning province

|                                 |                                                                                                                                                                   |
|---------------------------------|-------------------------------------------------------------------------------------------------------------------------------------------------------------------|
| Journal:                        | <i>BMJ Open</i>                                                                                                                                                   |
| Manuscript ID                   | bmjopen-2019-029869.R2                                                                                                                                            |
| Article Type:                   | Original research                                                                                                                                                 |
| Date Submitted by the Author:   | 03-Sep-2019                                                                                                                                                       |
| Complete List of Authors:       | Zhang, Huijun; Tianjin University, School of Pharmaceutical Science and Technology; Jinzhou Medical University, School of Nursing<br>Sun, He; Tianjin University, |
| <b>Primary Subject Heading</b>: | Nursing                                                                                                                                                           |
| Secondary Subject Heading:      | Occupational and environmental medicine                                                                                                                           |
| Keywords:                       | knowledge, attitude, self-efficacy, elderly caregivers, nursing homes, China                                                                                      |
|                                 |                                                                                                                                                                   |

SCHOLARONE™  
Manuscripts

1  
2  
3 **Knowledge, attitude and self-efficacy of elderly caregivers in Chinese nursing**  
4 **homes: A cross-sectional study in Liaoning province**  
5  
6  
7

8 **Huijun Zhang**  
9

10 Affiliated institution: 1, School of Pharmaceutical Science and Technology, Tianjin  
11  
12

13 University, Tianjin, China; 2, School of Nursing, Jinzhou Medical University,  
14

15 Jinzhou, Liaoning province, China  
16

17  
18 E-mail: [13904069606@163.com](mailto:13904069606@163.com)  
19  
20  
21  
22

23 **He Sun ( Corresponding author )**  
24

25  
26 Affiliated institution: School of Pharmaceutical Science and Technology, Tianjin  
27  
28

29 University, Tianjin, China  
30

31 E-mail: [18768429445@163.com](mailto:18768429445@163.com)  
32  
33  
34  
35  
36  
37  
38  
39  
40  
41  
42  
43  
44  
45  
46  
47  
48  
49  
50  
51  
52  
53  
54  
55  
56  
57  
58  
59  
60

## Abstract

**Objectives** This study aimed to investigate the perceptions of elderly caregivers in Chinese nursing homes (NHs) and associated factors with regard to knowledge, attitude about elderly and self-efficacy.

**Setting** A cross-sectional questionnaire survey was conducted on 12 NHs in Liaoning province, China.

**Participants** A total of 403 caregivers from 12 NHs were surveyed.

**Outcome measures** Data were collected using a self-administered questionnaire composed of the Paltmore's Facts on Aging Quiz I, the Kogan's Attitude Old People Scale, Generalised Self-efficacy Scale and background characteristics of participants. An average score for knowledge, attitude and self-efficacy was calculated. Differences across groups were evaluated using Student's *t*-test and ANOVA. Multivariable linear regression models were established to estimate the associated factors.

**Results** The participating caregivers reported a relative low score on knowledge about the elderly (10.42±2.79), attitude toward old people (127.85±14.36) and self-efficacy (27.12±4.9). Multivariable regression analysis showed that respondents who had high educational level ( $\beta=0.232$ , 95% CI: 0.027 to 0.907), received pre-job training ( $\beta=0.196$ , 95% CI: 0.121 to 1.169) and had high job satisfaction ( $\beta=0.358$ , 0.370; 95% CI: 0.123 to 1.875 and 0.110 to 1.283) gave a positive rating on knowledge. Caregivers who were employed as formal staff ( $\beta=0.136$ , 95% CI: 0.016 to 7.670), earned a high income ( $\beta=0.214$ , 95% CI: 0.009 to 4.561) and had an interest in working with the elderly ( $\beta=0.191$ , 95% CI: 0.018 to 2.808) tended to develop a positive attitude towards the elderly. However, caregivers who were female ( $\beta=-0.112$ , 95% CI: -1.753 to -0.010)

1  
2  
3  
4 and had long work experience ( $\beta=-0.130$ , 95% CI:  $-2.827$  to  $-0.018$ ) developed negative  
5  
6 perception. Caregivers who were older ( $\beta=0.205$ , 95% CI:  $0.039$  to  $3.427$ ), received pre-job  
7  
8 training ( $\beta=0.165$ , 95% CI:  $0.053$  to  $2.934$ ), had an interest in working with the elderly ( $\beta=0.154$ ,  
9  
10 95%CI:  $0.004$  to  $2.085$ ), had high job satisfaction ( $\beta=0.174$ , 95% CI:  $0.026$  to  $3.548$ ) and  
11  
12 perceived improved health status for the elderly ( $\beta=0.290$ ,  $0.447$ ; 95% CI:  $0.059$  to  $2.700$  and  
13  
14  $0.053$  to  $1.211$ ) gave a positive rating on self-efficacy.  
15  
16  
17  
18

### 19 **Conclusion**

20  
21 Knowledge about the elderly, attitude toward old people and self-efficacy of elderly caregivers in  
22  
23 Chinese NHs were at low levels. Some targeted intervention programs, such as conducting a  
24  
25 professional training for aged care and fostering an interest in working with the elderly, should be  
26  
27 given a priority for improving these attributes.  
28  
29  
30  
31  
32  
33  
34

### 35 **Strengths and limitations of this study**

- 36  
37  
38 ➤ This study is amongst the first to understand the perception of caregivers in Chinese nursing  
39  
40 homes on knowledge about aging, attitude toward the elderly and self-efficacy.  
41  
42  
43 ➤ Multivariable linear regression models were established and used to identify multifaceted  
44  
45 factors associated with the perceived knowledge, attitude and self-efficacy of caregivers.  
46  
47  
48 ➤ Using widely accepted scales (FAQ 1, KAOP and GSE) for data collection contributed to the  
49  
50 reliability of the results.  
51  
52  
53 ➤ The samples were collected from only one province located in the north-eastern region of  
54  
55 China. Caution needs to be taken when generalising the findings to China or other countries.  
56  
57  
58  
59  
60

## Introduction

Population ageing has been highlighted worldwide, especially in China. According to the National Bureau of Statistics of China (2017), the elderly population aged 60 years and higher has reached 240 million, accounting for 17.3% of the total population<sup>1 2</sup>. By 2050, this number is expected to increase up to 450 million, accounting for 33% of the total population<sup>3</sup>. Hence, China will become the country with the largest number of old people in the world. Such growth in population aging will result in significantly increased needs for long-term care.

Influenced by traditional Chinese culture, elderly people prefer to live with their children, and taking care for the elderly is regarded as the responsibility of the family<sup>4</sup>. However, the rising migration from rural to urban areas, especially amongst young people, and the shrinking average family size due to China's one-child policy<sup>5 6</sup> have changed the mainstream informal family-based caregiving model for older adults. Consequently, old people are being sent to nursing homes (NHs) for professional aged care.

Over the past few years, the Chinese government made a great effort to support the development of the aged care service industry and invested into NHs. Approximately 155,000 different types of NHs exist across Mainland China and include old age homes, retirement departments, residential care facilities, welfare institutes and geriatric hospitals. However, health workers in NHs have shortage of or lack formal vocational training<sup>3</sup>. As a result, low-level caregiving skills and poor health care quality become an urgent issue and have attracted a wide range of attention<sup>7 8</sup>.

Although the Chinese government launched the 'Basic Standards for Service Quality of Aged Agencies' in 2017, the quality of nursing services for the elderly is still not guaranteed<sup>9</sup>. Providing high-quality aged care services seem to pose a huge challenge in coping with China's aging



1  
2  
3  
4 society.

5  
6 Elderly caregivers in NHs, as the front-line health care workers, spend considerable time with old  
7  
8 people and have a direct effect on healthcare delivery<sup>10</sup>. However, holding a negative attitude and  
9  
10 misunderstanding about aging often create an adverse impact on provision of health care  
11  
12 behaviour and ultimately lead to poor health outcomes<sup>11 12</sup>. In addition to attitude and knowledge,  
13  
14 self-efficacy which is defined as ‘people’s beliefs about their capabilities to exercise control over  
15  
16 events that affect their lives’<sup>13</sup> is another widely recognised factor associated with health workers’  
17  
18 behaviour in care delivery. In general, high self-efficacy is associated with positive feelings about  
19  
20 one’s self, which facilitate cognitive processes and work achievement as well as confidence and  
21  
22 motivation<sup>14</sup>. Therefore, giving an emphasis on knowledge, attitude and self-efficacy of caregivers  
23  
24 is beneficial in providing high-quality aged care services.  
25  
26  
27  
28  
29  
30

31  
32 Many studies conducted in Western countries revealed that social workers, healthcare workers and  
33  
34 nursing students tend to have poor attitude, misconception, inadequate knowledge and lowest  
35  
36 priority to consider working with elderly<sup>15-18</sup>. However, there is paucity in the literature involved  
37  
38 in low- and middle-income Asian countries, including China. Understanding the knowledge,  
39  
40 attitude and self-efficacy of elderly caregivers in NHs and the significant increase in needs for  
41  
42 aged care in China has practical significance.  
43  
44  
45  
46  
47

48 This study aimed to investigate the perceptions of caregivers on knowledge about aging, attitude  
49  
50 toward the elderly and self-efficacy and their associated factors.  
51  
52  
53  
54

## 55 **Method**

### 56 **Setting and sampling**

1  
2  
3  
4 A cross-sectional quantitative survey was conducted on Liaoning province located in the  
5  
6 north-eastern region of China, where people aged over 60 years account for 22.65% of the total  
7  
8 population<sup>19</sup>.

9  
10  
11 We adopted a multistage sampling strategy. Firstly, three cities were selected from three different  
12  
13 geographical zones, namely, Shenyang representing central, Jinzhou representing west and  
14  
15 Dandong representing east. Four NHs (two for large size, two for small size) were selected  
16  
17 randomly in each city according to their organisation code. Twelve NHs were selected to  
18  
19 participate. Finally, half of the caregivers were considered as samples in each selected NH.

20  
21  
22 Data were collected from November 1, 2015 to May 31, 2016. Two to four trained investigators  
23  
24 assigned to each selected NH were required to invite caregivers working in different departments.

25  
26  
27 The participants were asked to provide informed consent letter and oral consent before they filled  
28  
29 out the questionnaires. We approached potential participants across the entire working time to  
30  
31 maximise the chance of capturing a representative sample.

32  
33  
34 Considering that NH has no standardised definition in Mainland China, this study defined it as an  
35  
36 institution included in residential long-term care facilities in Mainland China that mainly admit  
37  
38 people aged 60 years or higher. A qualified elderly caregiver usually needs to receive 3–5 years of  
39  
40 professional training in China. In this study, caregivers who had direct contact with the elderly  
41  
42 were eligible to participate in the investigation. These caregivers included physicians, nurses and  
43  
44 allied health workers. Participants should have worked in the selected NHs for more than 1 year  
45  
46 and voluntarily participated in the survey.

47  
48  
49 Approximately 800 caregivers were invited to participate in this investigation, and 480  
50  
51 participants (60%) filled in and returned the questionnaires. After excluding questionnaires with  
52  
53  
54  
55  
56  
57  
58  
59  
60

1  
2  
3  
4 uncompleted key items, 403 (83.9%) were considered valid for data analysis (Figure 1).  
5  
6 According to formula proposed by Peduzzi et al.<sup>20 21</sup>, the minimum sample size is at least  $10 \times K$ ,  
7  
8 where  $K$  is the number of predictors in the regression model. This sample size would be  
9  
10 sufficiently large for multivariable linear regression analyses for a model containing 18  
11  
12 dichotomous independent variables (Table 1).  
13  
14  
15

16  
17 **(Figure 1 should be here)**  
18

### 19 **Measurement**

20  
21 We adopted Palmore's Facts on Aging Quiz I (FAQ 1), the Kogan's Attitude Old People Scale  
22  
23 (KAOP) and Generalised Self-efficacy Scale (GSE) to measure knowledge about old people,  
24  
25 attitude toward the elderly and self-efficacy of caregivers, respectively. Data about characteristics  
26  
27 of the caregivers and their work environments were also collected by a self-developed  
28  
29 questionnaire.  
30  
31

32  
33  
34  
35 FAQ 1 developed by Palmore (1990) has been widely used to assess the subjects' (including  
36  
37 caregivers) physical, mental and social knowledge about aging as well as some of the most  
38  
39 common misconceptions about aging<sup>15 22</sup>. FAQ 1 is composed of 25 statements, such as 'old  
40  
41 people tend to react slower than young people' and 'old people are not as efficient as young  
42  
43 people.' The participants responded by stating whether a statement is true (T) or false (F); a score  
44  
45 of 1 is assigned if the answer is right, otherwise the score is 0. Therefore, the total scores range  
46  
47 from 0 to 25, with a high score representing high knowledge about the elderly. The Chinese  
48  
49 version of FAQ 1 introduced by Wang et al.<sup>23</sup> has adequate reliability (Cronbach's  $\alpha=0.68$ ).  
50  
51

52  
53  
54  
55  
56 KAOP, which is developed by Kogan in 1961, has been used to measure attitude towards the  
57  
58 elderly in many studies. This scale contains 34 items with 17 negative (KAOP-) and 17 (KAOP+)  
59  
60

1  
2  
3  
4 positive statements. Examples of the statements are as follows: ‘most the elderly gets set in their  
5  
6 ways and are unable to change,’ and ‘it is very easy to get on with the elderly.’ Each item is scored  
7  
8 using a six-point Likert scale (strongly disagree=1, disagree=2, slightly disagree=3, slightly  
9  
10 agree=5 and strongly agree=6). The scores on the statement presented negatively should be  
11  
12 reversed to estimate the total score. The total scores for the KAOP range from 34 to 204, with high  
13  
14 scores representing positive attitude towards the elderly<sup>24</sup>. For the Chinese version of KAOP, the  
15  
16 Cronbach’s  $\alpha$  is 0.82 for the total scale, indicating that it is a fully reliable instrument<sup>25</sup>.

17  
18  
19  
20  
21  
22 GSE, which was developed by Zhang and Schwarzer in 1995, is used widely to measure a general  
23  
24 sense of perceived self-efficacy<sup>26</sup>. The 10 items of the GSE are scored on a four-point scale (not  
25  
26 at all true=1, hardly true=2, moderately true=3 and exactly true=4). The total scores range from 10  
27  
28 to 40, with a high score indicating high self-efficacy. A Cronbach’s  $\alpha$  value of 0.89 for the  
29  
30 Chinese version of the GSE indicates that this instrument has high reliability for the study  
31  
32 population<sup>2</sup>.

33  
34  
35  
36  
37  
38 In the last part of the questionnaire, some close-ended questions were designed to collect  
39  
40 information about the background characteristics of the participating caregivers and their work  
41  
42 environment. General demographic characteristics including age, gender and educational level  
43  
44 were also investigated (Table 1). Various questions about caregivers’ work environment were also  
45  
46 asked. These questions include the following examples: ‘how many years have you been working  
47  
48 in this NH (work tenure)’ and ‘is your NH public or private (ownership of NH); located in rural or  
49  
50 urban (work place)’ (Table 1). The employment type of caregivers in Chinese NHs includes  
51  
52 formal and informal employees. Formal employees are hired by the government, and their wages  
53  
54 are paid by the National Finance Department. Informal employees are caregivers who signed the  
55  
56  
57  
58  
59  
60

1  
2  
3  
4 labour contract with NHs, and their wages come from the profits of the institution<sup>27</sup>. We also  
5  
6 obtained information on pre-job training (yes/no), interest in working with the elderly (yes/no) and  
7  
8 job satisfaction (not /generally/very satisfied). Meanwhile, we measured the perceived health  
9  
10 status of the elderly from caregivers by asking ‘how rate overall health status of the elderly who  
11  
12 you served in the past month (complete/partial/with no disability)’ (Table 1). These factors were  
13  
14 identified as independent variables in the regression model<sup>15 28 29</sup>.

### 22 **Data analysis**

23  
24 Scores on each item of FAQ 1, KAOP and GSE were added. According to the guidance on the use  
25  
26 of each scale, every item was given the same weight<sup>23 26 30</sup>. Average score was calculated to  
27  
28 evaluate the levels of knowledge, attitude and self-efficacy.  
29  
30

31  
32 The Kolmogorov–Smirnov test showed that the *p*-values for knowledge, attitude and self-efficacy  
33  
34 scores exceeded 0.10; as such, data of these variables were normally distributed. Student’s *t*-test  
35  
36 (for two-group comparisons) or ANOVA (for multiple group comparisons) was performed to  
37  
38 determine statistical differences in scores across different groups. Multivariable linear regression  
39  
40 models were established to identify factors associated with knowledge, attitude and self-efficacy  
41  
42 scores, and serving the characteristics of respondents as independent variables.  
43  
44  
45  
46  
47

48 In model establishment, we used the ENTER approach (all independent variables are forced into  
49  
50 the regression models) because of two reasons: first, we tend to explain the variations in  
51  
52 knowledge, attitude and self-efficacy scores instead of predicting them. This approach allowed us  
53  
54 to observe the parameters of these factors that are not significantly associated with the dependent  
55  
56 variables. Second, all independent variables in the model have been studied in other countries<sup>15 28</sup>.  
57  
58  
59  
60

To compare our results with those reported in other countries, we added all independent variables into the regression model. We also conducted logistic regression analyses for sensitivity test by recoding the knowledge, attitude and self-efficacy scores into dichotomous variables (Supplementary Table).

A double entry strategy was adopted to ensure the accuracy of data input by using EpiData 3.1.

All statistical analyses were performed using IBM SPSS Statistics V.22.0.

### **Patient and Public Involvement**

This study focused on knowledge about aging, attitude towards the elderly and self-efficacy; thus, patients were not directly involved in the survey.

## **Results**

### **Characteristics of respondents**

Of the 403 respondents, 89.8% were female. A total of 70.5% of the respondents aged more than 40 years. Only 20.3% of the caregivers had bachelor's degree or above. More than half of respondents had working tenure of <3 years (55.1%) and worked in urban setting (61.8%). The majority of the participants (86.8%) were employed as informal employees. Only 10.7% earned a monthly income of >3000 Chinese yuan. A total of 68.0% and 85.4% of respondents reported that they received pre-job training and had an interest in elderly care, respectively (Table 1).

### **Knowledge, attitude toward the elderly and self-efficacy**

Overall, relatively low scores for knowledge ( $10.42 \pm 2.79$ ), attitude ( $127.85 \pm 14.36$ ) and self-efficacy ( $27.12 \pm 4.91$ ) were measured by FAQ 1, KAOP and GSE, respectively, amongst caregivers in NHs.

Table 1 shows the differences in the scores of knowledge, attitude and self-efficacy rated by caregivers with different characteristics. Male respondents gave higher scores on attitude than female ones ( $p<0.05$ ). Older caregivers showed higher self-efficacy than younger ones ( $p<0.05$ ). Respondents with middle educational level gave higher scores on knowledge than the two other groups ( $p<0.05$ ). Caregivers working in public NHs had high scores on knowledge and attitude ( $p<0.05$ ). Formal employees showed better performance in terms of knowledge, attitude and self-efficacy ( $p<0.05$ ). Scores for attitude increased with increasing monthly salary ( $p<0.001$ ). Participants who received pre-job training reported high scores for knowledge and self-efficacy ( $p<0.05$ ). Respondents interested in elderly care gave high scores for attitude and self-efficacy ( $p<0.05$ ). Scores for the three domains varied across different job satisfaction levels ( $p<0.05$ ).

Table 1 Differences in knowledge, attitude and self-efficacy scores amongst different characteristics of caregivers

| Variables                   | N (%)      | FAQ 1 scores     |                 | KAOP scores        |                 | Self-efficacy scores |                 |
|-----------------------------|------------|------------------|-----------------|--------------------|-----------------|----------------------|-----------------|
|                             |            | Mean $\pm$ SD    | <i>p</i> -Value | Mean $\pm$ SD      | <i>p</i> -Value | Mean $\pm$ SD        | <i>p</i> -Value |
| <b>Gender</b>               |            |                  | 0.055           |                    | 0.034           |                      | 0.890           |
| Male                        | 41 (10.2)  | 11.22 $\pm$ 3.09 |                 | 132.30 $\pm$ 15.75 |                 | 27.02 $\pm$ 4.21     |                 |
| Female                      | 362 (89.8) | 10.33 $\pm$ 2.75 |                 | 127.31 $\pm$ 14.13 |                 | 27.13 $\pm$ 4.98     |                 |
| <b>Age (years)</b>          |            |                  | 0.070           |                    | 0.909           |                      | 0.004           |
| 30–39                       | 119 (29.5) | 10.37 $\pm$ 2.70 |                 | 128.22 $\pm$ 14.13 |                 | 26.33 $\pm$ 4.19     |                 |
| 40–49                       | 141 (35.0) | 10.83 $\pm$ 2.96 |                 | 127.93 $\pm$ 15.07 |                 | 26.70 $\pm$ 5.41     |                 |
| $\leq$ 50                   | 143 (35.5) | 10.07 $\pm$ 2.66 |                 | 127.45 $\pm$ 13.93 |                 | 28.18 $\pm$ 4.79     |                 |
| <b>Educational level</b>    |            |                  | 0.046           |                    | 0.276           |                      | 0.927           |
| Junior high school or below | 225 (55.8) | 10.23 $\pm$ 2.90 |                 | 126.93 $\pm$ 13.78 |                 | 27.09 $\pm$ 4.83     |                 |

|                               |                          |            |            |              |            |       |
|-------------------------------|--------------------------|------------|------------|--------------|------------|-------|
|                               | Secondary high school    | 96 (23.8)  | 11.04±2.77 | 129.72±14.08 | 27.03±5.20 |       |
|                               | Bachelor degree or above | 82 (20.3)  | 10.23±2.44 | 128.16±16.11 | 27.30±4.81 |       |
| <b>Work tenure (years)</b>    |                          |            |            | 0.858        | 0.172      | 0.355 |
|                               | 1–3                      | 222 (55.1) | 10.47±2.87 | 129.70±15.43 | 27.44±5.02 |       |
|                               | 4–6                      | 114 (28.3) | 10.44±2.81 | 128.55±10.61 | 26.76±4.64 |       |
|                               | ≤7                       | 67 (16.6)  | 10.25±2.53 | 126.68±14.72 | 26.68±4.96 |       |
| <b>Nursing home ownership</b> |                          |            |            | 0.033        | 0.032      | 0.708 |
|                               | Public                   | 132 (32.8) | 14.24±2.99 | 133.94±15.91 | 26.99±4.61 |       |
|                               | Private                  | 271 (67.2) | 10.51±2.69 | 127.80±13.58 | 27.18±5.05 |       |
| <b>Work place</b>             |                          |            |            | 0.127        | 0.862      | 0.296 |
|                               | Urban                    | 249 (61.8) | 10.26±2.84 | 127.94±15.20 | 27.32±4.96 |       |
|                               | Rural                    | 154 (38.2) | 10.69±2.71 | 127.69±12.95 | 26.78±4.82 |       |
| <b>Employment type</b>        |                          |            |            | 0.037        | 0.011      | 0.042 |
|                               | Informal employee        | 350 (86.8) | 10.24±2.81 | 127.05±14.20 | 25.33±4.47 |       |
|                               | Formal employee          | 53 (13.2)  | 15.40±2.56 | 135.63±15.96 | 27.66±5.22 |       |
| <b>Monthly income (¥)</b>     |                          |            |            | 0.466        | <0.001     | 0.975 |
|                               | <2000                    | 160 (39.7) | 10.21±2.81 | 126.52±15.21 | 27.05±5.24 |       |
|                               | 2000–3000                | 200 (49.6) | 10.56±2.74 | 127.13±12.71 | 27.16±4.91 |       |
|                               | >3000                    | 43 (10.7)  | 10.60±3.00 | 136.11±15.59 | 27.18±3.51 |       |
| <b>Pre-job training</b>       |                          |            |            | 0.040        | 0.106      | 0.001 |
|                               | No                       | 129 (32.0) | 10.01±2.95 | 126.16±14.38 | 25.91±4.62 |       |
|                               | Yes                      | 274 (68.0) | 10.62±2.70 | 128.64±14.31 | 27.69±4.94 |       |



|                                                |            |            |              |            |       |        |
|------------------------------------------------|------------|------------|--------------|------------|-------|--------|
| <b>Health status of the elderly</b>            |            |            |              | 0.868      | 0.602 | <0.001 |
| Complete disability                            | 34 (8.4)   | 10.21±2.21 | 125.49±14.11 | 26.32±4.34 |       |        |
| Partial disability                             | 219 (54.3) | 10.42±2.79 | 127.98±13.50 | 27.62±5.17 |       |        |
| No disability                                  | 150 (37.2) | 10.49±2.92 | 128.19±15.63 | 30.64±5.41 |       |        |
| <b>Interest in working with elderly people</b> |            |            |              | 0.273      | 0.019 | 0.022  |
| No                                             | 58 (14.4)  | 9.88±2.72  | 123.74±14.15 | 25.68±4.66 |       |        |
| Yes                                            | 344 (85.4) | 10.51±2.80 | 128.60±14.28 | 27.34±4.91 |       |        |
| <b>Job satisfaction</b>                        |            |            |              | 0.001      | 0.033 | 0.001  |
| Not satisfied                                  | 34 (8.4)   | 8.68±2.77  | 121.97±16.80 | 25.14±5.42 |       |        |
| Generally satisfied                            | 151 (37.5) | 10.66±2.49 | 127.70±13.29 | 26.42±4.94 |       |        |
| Very satisfied                                 | 218 (54.1) | 10.54±2.91 | 128.86±14.51 | 27.91±4.66 |       |        |

### Factors associated with knowledge, attitude and self-efficacy: results of multivariable linear regression analyses

Table 2 shows the results of the three multivariable linear regression models for analysis of factors associated with knowledge, attitude and self-efficacy.

#### Knowledge about older people

Respondents with bachelor's degree or above ( $\beta=0.232$ , 95% CI: 0.027 to 0.907) gave higher scores in FAQ I than those who completed junior high school or below. People who received pre-job training ( $\beta=0.196$ , 95% CI: 0.121 to 1.169) were more likely to report high scores for knowledge.

Job satisfaction ( $\beta=0.358$ , 0.370; 95% CI: 0.123 to 1.875 and 0.110 to 1.283) had proportional relationship to knowledge.

### Attitudes toward older people

The attitude scores in KAOP were high for those who were employed as formal employee ( $\beta=0.136$ , 95% CI: 0.016 to 7.670), earned high wages ( $\beta=0.214$ , 95% CI: 0.009 to 4.561) and had an interest in working with aged people ( $\beta=0.191$ , 95% CI: 0.018 to 2.808). However, female ( $\beta=-0.112$ , 95% CI: -1.753 to -0.010) and respondents with more than 7 years of work experience ( $\beta=-0.130$ , 95% CI: -2.827 to -0.018) reported low scores.

### Caregiver self-efficacy

A high self-efficacy score in GSE was observed in caregivers who were older ( $\beta=0.205$ , 95% CI: 0.039 to 3.427), received pre-job training ( $\beta=0.165$ , 95% CI: 0.053 to 2.934), had interest in working with the elderly ( $\beta=0.154$ , 95% CI: 0.004 to 2.085), had high job satisfaction ( $\beta=0.174$ , 95% CI: 0.026 to 3.548) and perceived improved health status of the elderly they served ( $\beta=0.290$ , 95% CI: 0.059 to 2.700 and 0.053 to 1.211).

A moderate association<sup>31</sup> between knowledge and attitude scores ( $r=0.233$ ,  $p<0.05$ ) and between attitude and self-efficacy scores ( $r=0.150$ ,  $p<0.05$ ) was tested by Pearson correlation calculations.

The correlation coefficient between knowledge and self-efficacy was not statistically significant ( $r=0.034$ ,  $p>0.05$ ).

Table 2 Factors associated with knowledge, attitude and self-efficacy: multivariable linear regression models

| Variables     | FAQ 1 scores |                 |       | KAOP scores   |                         |              | Self-efficacy scores |                 |       |
|---------------|--------------|-----------------|-------|---------------|-------------------------|--------------|----------------------|-----------------|-------|
|               | $\beta$      | 95% CI          | $p$   | $\beta$       | 95% CI                  | $p$          | $B$                  | 95% CI          | $p$   |
| <b>Gender</b> |              |                 |       |               |                         |              |                      |                 |       |
| Male          | Ref.         |                 |       | Ref.          |                         |              | Ref.                 |                 |       |
| Female        | -0.082       | (-1.646, 0.176) | 0.102 | <b>-0.112</b> | <b>(-1.753, -0.010)</b> | <b>0.026</b> | 0.011                | (-1.269, 1.813) | 0.818 |

|    |                               |              |                       |              |               |                         |              |              |                       |              |
|----|-------------------------------|--------------|-----------------------|--------------|---------------|-------------------------|--------------|--------------|-----------------------|--------------|
| 1  |                               |              |                       |              |               |                         |              |              |                       |              |
| 2  |                               |              |                       |              |               |                         |              |              |                       |              |
| 3  |                               |              |                       |              |               |                         |              |              |                       |              |
| 4  | <b>Age (years)</b>            |              |                       |              |               |                         |              |              |                       |              |
| 5  |                               |              |                       |              |               |                         |              |              |                       |              |
| 6  |                               |              |                       |              |               |                         |              |              |                       |              |
| 7  | 30–39                         | Ref.         |                       |              | Ref.          |                         |              | Ref.         |                       |              |
| 8  |                               |              |                       |              |               |                         |              |              |                       |              |
| 9  | 40–49                         | 0.110        | (−0.143, 1.345)       | 0.102        | −0.017        | (−4.468, 3.125)         | 0.792        | 0.095        | (−0.363, 2.153)       | 0.131        |
| 10 |                               |              |                       |              |               |                         |              |              |                       |              |
| 11 |                               |              |                       |              |               |                         |              |              |                       |              |
| 12 | ≤50                           | −0.018       | (−0.961, 0.629)       | 0.791        | −0.043        | (−5.362, 2.750)         | 0.534        | <b>0.205</b> | <b>(0.039, 3.427)</b> | <b>0.002</b> |
| 13 |                               |              |                       |              |               |                         |              |              |                       |              |
| 14 | <b>Education level</b>        |              |                       |              |               |                         |              |              |                       |              |
| 15 |                               |              |                       |              |               |                         |              |              |                       |              |
| 16 |                               |              |                       |              |               |                         |              |              |                       |              |
| 17 | Junior high school or below   | Ref.         |                       |              | Ref.          |                         |              | Ref.         |                       |              |
| 18 |                               |              |                       |              |               |                         |              |              |                       |              |
| 19 | Secondary high school         | 0.102        | (−0.020, 1.410)       | 0.067        | 0.076         | (−1.217, 6.078)         | 0.170        | 0.015        | (−1.086, 1.331)       | 0.772        |
| 20 |                               |              |                       |              |               |                         |              |              |                       |              |
| 21 | Bachelor degree or above      | <b>0.232</b> | <b>(0.027, 0.907)</b> | <b>0.018</b> | −0.013        | (−5.121, 3.721)         | 0.840        | 0.023        | (−1.313, 1.617)       | 0.708        |
| 22 |                               |              |                       |              |               |                         |              |              |                       |              |
| 23 |                               |              |                       |              |               |                         |              |              |                       |              |
| 24 |                               |              |                       |              |               |                         |              |              |                       |              |
| 25 | <b>Working tenure (years)</b> |              |                       |              |               |                         |              |              |                       |              |
| 26 |                               |              |                       |              |               |                         |              |              |                       |              |
| 27 | 1–3                           | Ref.         |                       |              | Ref.          |                         |              | Ref.         |                       |              |
| 28 |                               |              |                       |              |               |                         |              |              |                       |              |
| 29 |                               |              |                       |              |               |                         |              |              |                       |              |
| 30 | 4–6                           | −0.005       | (−0.642, 0.620)       | 0.923        | 0.094         | (−0.389, 6.053)         | 0.071        | −0.089       | (−2.105, 0.029)       | 0.075        |
| 31 |                               |              |                       |              |               |                         |              |              |                       |              |
| 32 |                               |              |                       |              |               |                         |              |              |                       |              |
| 33 | ≤7                            | −0.056       | (−1.131, 0.421)       | 0.290        | <b>−0.130</b> | <b>(−2.827, −0.018)</b> | <b>0.044</b> | −0.048       | (−2.146, 0.478)       | 0.344        |
| 34 |                               |              |                       |              |               |                         |              |              |                       |              |
| 35 | <b>NH ownership</b>           |              |                       |              |               |                         |              |              |                       |              |
| 36 |                               |              |                       |              |               |                         |              |              |                       |              |
| 37 |                               |              |                       |              |               |                         |              |              |                       |              |
| 38 | Public                        | Ref.         |                       |              | Ref.          |                         |              | Ref.         |                       |              |
| 39 |                               |              |                       |              |               |                         |              |              |                       |              |
| 40 | Private                       | 0.032        | (−0.417, 0.770)       | 0.528        | −0.001        | (−2.827, 3.227)         | 0.984        | 0.057        | (−0.308, 1.698)       | 0.242        |
| 41 |                               |              |                       |              |               |                         |              |              |                       |              |
| 42 |                               |              |                       |              |               |                         |              |              |                       |              |
| 43 | <b>Work place</b>             |              |                       |              |               |                         |              |              |                       |              |
| 44 |                               |              |                       |              |               |                         |              |              |                       |              |
| 45 |                               |              |                       |              |               |                         |              |              |                       |              |
| 46 | Urban                         | Ref.         |                       |              | Ref.          |                         |              | Ref.         |                       |              |
| 47 |                               |              |                       |              |               |                         |              |              |                       |              |
| 48 | Rural                         | 0.054        | (−0.155, 0.987)       | 0.286        | −0.022        | (−3.617, 2.211)         | 0.663        | −0.003       | (−0.993, 0.939)       | 0.956        |
| 49 |                               |              |                       |              |               |                         |              |              |                       |              |
| 50 |                               |              |                       |              |               |                         |              |              |                       |              |
| 51 | <b>Employment type</b>        |              |                       |              |               |                         |              |              |                       |              |
| 52 |                               |              |                       |              |               |                         |              |              |                       |              |
| 53 | Informal employee             | Ref.         |                       |              | Ref.          |                         |              | Ref.         |                       |              |
| 54 |                               |              |                       |              |               |                         |              |              |                       |              |
| 55 | Formal employee               | 0.109        | (−0.035, 1.150)       | 0.052        | <b>0.136</b>  | <b>(0.016, 7.670)</b>   | <b>0.012</b> | 0.102        | (−1.313, 0.689)       | 0.069        |
| 56 |                               |              |                       |              |               |                         |              |              |                       |              |
| 57 |                               |              |                       |              |               |                         |              |              |                       |              |
| 58 | <b>Monthly income (¥)</b>     |              |                       |              |               |                         |              |              |                       |              |
| 59 |                               |              |                       |              |               |                         |              |              |                       |              |
| 60 |                               |              |                       |              |               |                         |              |              |                       |              |

|                                         |                                |              |                       |                  |              |                       |                  |              |                       |                  |
|-----------------------------------------|--------------------------------|--------------|-----------------------|------------------|--------------|-----------------------|------------------|--------------|-----------------------|------------------|
|                                         | <2000                          | Ref.         |                       |                  | Ref.         |                       |                  | Ref.         |                       |                  |
|                                         | 2000–3000                      | 0.015        | (–0.461, 0.752)       | 0.784            | –0.004       | (–3.610, 2.578)       | 0.939            | 0.014        | (–1.050, 1.001)       | 0.796            |
|                                         | >3000                          | 0.036        | (–0.742, 1.221)       | 0.516            | <b>0.214</b> | <b>(0.009, 4.561)</b> | <b>&lt;0.001</b> | –0.004       | (–1.890, 1.429)       | 0.936            |
| <b>Pre-job training</b>                 |                                |              |                       |                  |              |                       |                  |              |                       |                  |
|                                         | No                             | Ref.         |                       |                  | Ref.         |                       |                  | Ref.         |                       |                  |
|                                         | Yes                            | <b>0.196</b> | <b>(0.121, 1.169)</b> | <b>0.047</b>     | 0.056        | (–1.301, 5.280)       | 0.305            | <b>0.165</b> | <b>(0.053, 2.934)</b> | <b>0.002</b>     |
| <b>Health status of elderly</b>         |                                |              |                       |                  |              |                       |                  |              |                       |                  |
|                                         | Complete disability            | Ref.         |                       |                  | Ref.         |                       |                  | Ref.         |                       |                  |
|                                         | Partial disability             | 0.001        | (–1.032, 0.994)       | 0.987            | 0.114        | (–1.885, 8.457)       | 0.214            | <b>0.447</b> | <b>(0.059, 2.700)</b> | <b>&lt;0.001</b> |
|                                         | No disability                  | 0.010        | (–1.069, 1.026)       | 0.910            | 0.084        | (–2.931, 7.759)       | 0.362            | <b>0.290</b> | <b>(0.053, 1.211)</b> | <b>0.001</b>     |
| <b>Interest in working with elderly</b> |                                |              |                       |                  |              |                       |                  |              |                       |                  |
|                                         | No                             | Ref.         |                       |                  | Ref.         |                       |                  | Ref.         |                       |                  |
|                                         | Yes                            | 0.080        | (–0.358, 1.230)       | 0.122            | <b>0.191</b> | <b>(0.018, 2.808)</b> | <b>0.039</b>     | <b>0.154</b> | <b>(0.004, 2.085)</b> | <b>0.013</b>     |
| <b>Job satisfaction</b>                 |                                |              |                       |                  |              |                       |                  |              |                       |                  |
|                                         | Not satisfied                  | Ref.         |                       |                  | Ref.         |                       |                  | Ref.         |                       |                  |
|                                         | Generally satisfied            | <b>0.358</b> | <b>(0.123, 1.875)</b> | <b>&lt;0.001</b> | 0.081        | (–0.293, 7.808)       | 0.393            | 0.052        | (–1.103, 2.469)       | 0.572            |
|                                         | Very satisfied                 | <b>0.370</b> | <b>(0.110, 1.283)</b> | <b>&lt;0.001</b> | 0.109        | (–2.508, 8.275)       | 0.278            | <b>0.174</b> | <b>(0.026, 3.548)</b> | <b>0.044</b>     |
|                                         | <i>F</i>                       | 2.378        |                       | 0.001            | 2.344        |                       | 0.001            | 3.740        |                       | <0.001           |
|                                         | <i>R</i> <sup>2</sup>          | 0.116        |                       |                  | 0.114        |                       |                  | 0.171        |                       |                  |
|                                         | Adjusted <i>R</i> <sup>2</sup> | 0.105        |                       |                  | 0.109        |                       |                  | 0.155        |                       |                  |

Note: Figures in bold letters/numbers indicate coefficients with statistical significance

## Discussion

The rising of the elderly population has led to challenges for the Chinese government in meeting the increasing needs for professional healthcare for aged people. This study assessed the knowledge and attitude about the aging and self-efficacy of caregivers working in Chinese NHs. Low levels of knowledge, attitude and self-efficacy were observed in the present study compared with those in other countries or regions<sup>28 30 32</sup>. At the initial stage of NH development in China, severe shortage of qualified health workers and insufficient professional training resulted in difficulties of the majority of caregivers in providing healthcare services for the elderly<sup>3</sup>. Low income and negative expectation for career development also adversely influenced the work performance of caregivers<sup>33</sup>.

Consistent with other studies<sup>18 30 34</sup>, the present results found that caregivers who received higher level education and pre-job training gave higher scores for knowledge about the elderly. A possible reason is that long-term education and professional training not only improved the working ability of caregivers but can also teach additional knowledge and further correct their misunderstanding about aging. In addition to the two factors, high job satisfaction level was also associated with knowledge given that this driving force factor can encourage staff to learn additional information relative to their work<sup>35</sup>.

With respect to attitude toward the elderly, this study indicated the females were more likely to have negative attitude compared with males, inconsistent with other studies<sup>15 36</sup>. The potential explanation is that women in Chinese traditional families take additional responsibilities in cultivating children and taking care of old people; as such, female caregivers tend to develop poor attitude. Additionally, gender discrimination in the workplace often results in unequal treatment

1  
2  
3  
4 for females in terms of wages and career advancement<sup>37 38</sup>. Therefore, female caregivers tend to  
5  
6 have poor attitude. The negative association of work tenure with attitude can be explained by the  
7  
8 fact long-term work in the same position can result in burnout<sup>39</sup>, leading to negative emotion  
9  
10 toward work.  
11  
12

13  
14 Similar to other study<sup>40</sup>, caregivers employed as formal staff had positive attitude towards the  
15  
16 elderly than informal employees. This finding could be mainly due to the unequal salary system in  
17  
18 Chinese NHs. Considering that the wages of formal employees are paid by government revenues,  
19  
20 they often obtain more benefits (such as social insurances) than the others although they have the  
21  
22 same work load<sup>41</sup>. Therefore, this unfair payback system for informal staff explains their negative  
23  
24 attitude towards their work. Similarly, the KAOP scores increased with increasing income,  
25  
26 reflecting the important role of economic factors in improving the work enthusiasm and  
27  
28 performance of caregivers<sup>42</sup>. Caregivers interested in working with the elderly tended to have  
29  
30 positive attitude. A possible explanation for this phenomenon is the fact that interest in their job  
31  
32 can alleviate perceived work stress and further reduce prejudice against the elderly<sup>43 44</sup>.  
33  
34  
35  
36  
37  
38  
39

40  
41 In this study, the age of caregivers had a positive relationship to self-efficacy, consistent with  
42  
43 previous results<sup>45</sup>. Old age often indicates an increase in life and work experiences and,  
44  
45 accordingly, improved people's beliefs about their capabilities. Caregivers who received pre-job  
46  
47 training are expected to possess improved work skills in handling workload and overcoming  
48  
49 obstacles, thereby enhancing their self-perception on personal efficacy<sup>46</sup>.  
50  
51  
52

53  
54 The perceived health status of the elderly evaluated by caregivers is also responsible for the  
55  
56 variations in self-efficacy scores. Providing services for the old adults without disability decreases  
57  
58 difficulty for caregivers compared with caring for disabled ones<sup>47</sup>. Thus, this group of caregivers  
59  
60

1  
2  
3  
4 is more likely to perceive a high level of self-efficacy. Meanwhile, the positive association of  
5  
6 self-efficacy with interest in working with old and job satisfaction indicated these factors can  
7  
8 evoke enthusiastic attitude towards work, thereby improving self-confidence in coping with work  
9  
10 difficulties.  
11  
12

13  
14 The positive correlations amongst knowledge, attitude and self-efficacy presented in this study  
15  
16 agreed with “knowledge–attitude–practice” theory<sup>48 49</sup>. Knowing the correct knowledge about  
17  
18 aging is beneficial for caregivers to develop an optimistic attitude toward elderly people<sup>48</sup>.  
19  
20 Accordingly, positive attitude is beneficial for improving people’s beliefs about their  
21  
22 capabilities<sup>49</sup>. Therefore, these closed associations indicated that the effective workforce  
23  
24 management for caregivers should take knowledge, attitude and self-efficacy into account.  
25  
26  
27  
28  
29  
30  
31

### 32 **Limitation**

33  
34 This study has several limitations. Firstly, the 403 samples from Liaoning province were limited to  
35  
36 reflect the comprehensive situation in China. This sample size also affected the width of 95% CI  
37  
38 in the regression models, although it is sufficient for data analysis. Caution needs to be taken when  
39  
40 generalising the findings. Secondly, exploratory variables mainly included demographics and  
41  
42 working environment characteristics of caregivers although the selection of these variables was  
43  
44 supported by previous studies and interviews. However, institutional-level factors potentially  
45  
46 influencing the perceptions of caregivers, such as number of employees and elderly in NHs, were  
47  
48 ignored because data are unavailable. As such, the  $R^2$  of the regression models was relatively low.  
49  
50  
51 Therefore, further studies should cover factors at different levels. Thirdly, readers should be aware  
52  
53 that participants may report what they believe the researcher wants to know instead of the truth.  
54  
55  
56  
57  
58  
59  
60

1  
2  
3  
4 Hence, the use of a self-reporting questionnaire could lead to idealised responses to meet socially  
5  
6 acceptable norms.  
7  
8  
9

## 10 **Conclusion**

11  
12  
13 This study provides insights on the knowledge, attitude about the elderly and self-efficacy of  
14  
15 caregivers in Chinese NHs and identify their associated characteristics and work environment  
16  
17 factors. Relatively poor knowledge level, attitude and self-efficacy suggest that several targeted  
18  
19 actions should be implemented to improve these attributes.  
20  
21  
22

23  
24 Firstly, professional training for aged care should be conducted to improve the knowledge and  
25  
26 abilities of caregivers. Secondly, a performance-based pay system can be considered to encourage  
27  
28 caregivers to develop a positive attitude. For example, old people's satisfaction with service can  
29  
30 be used as a performance evaluation indicator; an equal payment system for informal and formal  
31  
32 employee should be designed. Thirdly, fostering an interest in working with the elderly, such as  
33  
34 opening nursing curricula for caregivers to diminish misconceptions about aging and emphasise  
35  
36 the potential for job satisfaction from working with older people, can also be considered.  
37  
38  
39  
40  
41  
42  
43  
44

## 45 **Ethics approval and consent to participate**

46  
47 Our study was approved by the ethics committee of Jinzhou Medical University  
48  
49 (JMU00001078-15088)  
50  
51

## 52 **Consent for publication**

53  
54  
55 Consent for publication was obtained from persons we investigated in this study.  
56  
57

## 58 **Availability of data and material**



1  
2  
3  
4 The data sets analysed during this study are available from the corresponding author on reasonable  
5  
6 request  
7  
8

### 9 **Competing interests**

10  
11 The authors declare that they have no competing interests.  
12  
13

### 14 **Funding**

15  
16 This work was supported by Liaoning Provincial Social Science Project (NO.2019lslktyb-067)  
17  
18

### 19 **Authors' contributions**

20  
21 All authors made significant contributions to the study. HZ conceptualized this study and analysed  
22  
23 the data. Moreover, she wrote the first draft of the manuscript. HS interpreted the results and  
24  
25 revised the manuscript. The final version submitted for publication was read and approved by all  
26  
27 authors.  
28  
29  
30  
31

### 32 **Acknowledgements**

33  
34 The authors gratefully acknowledge all interviewees participating in this study.  
35  
36  
37  
38  
39

### 40 **References**

- 41  
42  
43 1. Wu M, Li SX, Zhang NJ, et al. Nursing home research in Jinan, China: a focus group  
44  
45 approach. *International Journal of Public Policy* 2012;1(8):21-30.  
46  
47  
48 2. Fua F, Lianga Y, Anb Y, et al. Self-efficacy and psychological well-being of nursing home  
49  
50 residents in China: the mediating role of social engagement. *Asia Pacific Journal of*  
51  
52 *Social Work and Development* 2018;28(2):128-40.  
53  
54  
55 3. Song Y, Anderson RA, Corazzini KN, et al. Staff characteristics and care in Chinese  
56  
57 nursing homes: A systematic literature review. *International Journal of Nursing*  
58  
59  
60

- 1  
2  
3  
4 *Sciences* 2014;1(4):423-36.  
5  
6  
7 4. Chan YK, Lee RPL. Network Size, Social Support and Happiness in Later Life: A  
8  
9 Comparative Study of Beijing and Hong Kong. *Journal of Happiness Studies*  
10  
11 2006;7(1):87-112.  
12  
13  
14 5. Wong YC, Leung J. Long-term care in China: issues and prospects. *J Gerontol Soc Work*  
15  
16 2012;55(7):570-86.  
17  
18  
19 6. Zhan HJ. Population Aging and Long-Term Care in China. *Generations* 2013;37(1):53-58.  
20  
21  
22 7. Hao Q, Wu S, Ying L, et al. Current dilemmas of nursing homes in Chengdu: a  
23  
24 cross-sectional survey. *Journal of the American Medical Directors Association*  
25  
26 2012;13(4):406.e9-06.e12.  
27  
28  
29 8. Feng Z, Liu C, Guan X, et al. China's Rapidly Aging Population Creates Policy Challenges  
30  
31 In Shaping A Viable Long-Term Care System. *Health Affairs* 2012;31(12):2764-73.  
32  
33  
34 9. Zhang H. Who will care for our parents? Changing boundaries of family and public roles in  
35  
36 providing care for the aged in urban China. *Care Management Journals*  
37  
38 2007;8(1):1-10.  
39  
40  
41 10. Lee AC, Wong AK, Loh EK. Score in the Palmore's Aging Quiz, knowledge of community  
42  
43 resources and working preferences of undergraduate nursing students toward the  
44  
45 elderly in Hong Kong. *Nurse Educ Today* 2006;26(4):269-76.  
46  
47  
48 11. Fagerberg I, Ekman S-L. Caring for elderly patients: a longitudinal study of Swedish  
49  
50 nursing students' narratives. *Health Care in Later Life* 1998(3):258-71.  
51  
52  
53 12. Kim O-N, Oh J-w, Kim Y-S, et al. Impacts of Perceived Health Status and Self-efficacy in  
54  
55 Hospital Nurses on their Health Promoting Behaviors. *Advances in information*  
56  
57  
58  
59  
60

- 1  
2  
3  
4 *Sciences and Service Sciences* 2014;6(11):139-44.  
5  
6  
7 13. Bandura A. Perceived Self-Efficacy in Cognitive Development and Functioning 1993.  
8  
9  
10 14. Chris G. Stress, coping and burn-out in nursing students. *International Journal of Nursing*  
11  
12 *Studies* 2010;47(10):1299-309.  
13  
14 15. Hweidi IM, Alhassan MA. Jordanian nurses' attitudes toward older patients in acute care  
15  
16 settings. *International Nursing Review* 2010;52(3):225-32.  
17  
18  
19 16. Gallagher S, Bennett KM, Halford JC. A comparison of acute and long-term health-care  
20  
21 personnel's attitudes towards older adults. *International Journal of Nursing Practice*  
22  
23 2010;12(5):273-79.  
24  
25  
26 17. Jacelon CS. Attitudes and behaviors of hospital staff toward elders in an acute care  
27  
28 setting *Applied Nursing Research* 2002;15(4):227-34.  
29  
30  
31 18. Yenişehir S, Karakaya MG. Knowledge and practice of nursing home caregivers about  
32  
33 urinary incontinence. *European Geriatric Medicine* 2019;10(1):99-105.  
34  
35  
36 19. Network CY. The growth rate of the elderly population in Liaoning Province slowed down  
37  
38 in 2017, and the population of young and old people increased rapidly. 2017  
39  
40 [Available  
41  
42 from:[https://sh.qihoo.com/9715f9adce7664579?cota=1&refer\\_scene=so\\_1&sign=360](https://sh.qihoo.com/9715f9adce7664579?cota=1&refer_scene=so_1&sign=360_e39369d1)  
43  
44 [e39369d1](https://sh.qihoo.com/9715f9adce7664579?cota=1&refer_scene=so_1&sign=360_e39369d1).  
45  
46  
47  
48  
49 20. P Peduzzi , J Concato , Feinstein A. Importance of events per independent variable in  
50  
51 proportional hazards regression analysis. II. Accuracy and precision of regression  
52  
53 estimates. *Journal of Clinical Epidemiology* 2007;30(4):618-26.  
54  
55  
56 21. Peduzzi, Peter Concato, Kemper J. A Simulation Study of the Number of Events per  
57  
58  
59  
60

- 1  
2  
3  
4 Variable in Logistic Regression Analysis. *Journal of Clinical Epidemiology*  
5  
6 1996;49(12):1373-9.  
7  
8  
9 22. Kane RL. Ageism: Negative and Positive 2nd Edition. *Journal of Public Health Policy*  
10  
11 2000;21(2):247-49.  
12  
13  
14 23. Wang CC, Liao WP, Yuan SC, et al. The Chinese version of the Facts on Aging Quiz  
15  
16 scale: reliability and validity assessment. *International Journal of Nursing Studies*  
17  
18 2010;47(6):742-52.  
19  
20  
21  
22 24. Wang CC, Liao WC, Kao MC, et al. Taiwanese medical and nursing student interest  
23  
24 levels in and attitudes towards geriatrics. *Annals of the Academy of Medicine*  
25  
26 *Singapore* 2009;38(3):230.  
27  
28  
29  
30 25. Yen CH, Liao WC, Chen YR, et al. A Chinese version of Kogan's Attitude Toward Older  
31  
32 People Scale: reliability and validity assessment. *International Journal of Nursing*  
33  
34 *Studies* 2009;46(1):38-44.  
35  
36  
37  
38 26. Schwarzer R, Bäßler J, Kwiatek P, et al. The assessment of optimistic self-beliefs:  
39  
40 Comparison of the German, Spanish, and Chinese versions of the General  
41  
42 Self-efficacy Scale. *Applied Psychology* 2010;46(1):69-88.  
43  
44  
45  
46 27. Fang LC. Informal employment and gender implications in China: the nature of work and  
47  
48 employment relations in the community services sector. *International Journal of*  
49  
50 *Human Resource Management* 2006;17(8):1471-87.  
51  
52  
53  
54 28. Doherty M, Mitchell EA, O'Neill S. Attitudes of Healthcare Workers towards Older People  
55  
56 in a Rural Population: A Survey Using the Kogan Scale. *Nursing Research & Practice*  
57  
58 2011;2011(1):352627.  
59  
60

- 1  
2  
3  
4 29. Hu SH, Yu YM, Chang WY, et al. Social support and factors associated with self-efficacy  
5  
6 among acute-care nurse practitioners. *Journal of Clinical Nursing* 2017;27(2):876-82.  
7  
8  
9 30. Lambrinou E, Sourtzi P, Kalokerinou A, et al. Attitudes and knowledge of the Greek  
10  
11 nursing students towards older people. *Nurse Educ Today* 2009;29(6):617-22.  
12  
13  
14 31. Benesty J, Chen J, Huang Y, et al. Pearson Correlation Coefficient. In: Cohen I, Huang Y,  
15  
16 Chen J, et al., eds. Noise Reduction in Speech Processing. Berlin, Heidelberg:  
17  
18 Springer Berlin Heidelberg 2009:1-4.  
19  
20  
21  
22 32. Tierney AJ, Lewis SJ, Vallis J. Nurses' knowledge and attitudes towards older patients  
23  
24 admitted to acute orthopaedic wards. *Journal of Orthopaedic Nursing*  
25  
26 1998;2(2):67-75.  
27  
28  
29  
30 33. Gaugler JE, Mittelman MS, Hepburn K, et al. Predictors of change in caregiver burden  
31  
32 and depressive symptoms following nursing home admission. *Psychol Aging*  
33  
34 2009;24(2):385-96.  
35  
36  
37  
38 34. Scerri A, Scerri C. Nursing students' knowledge and attitudes towards dementia — A  
39  
40 questionnaire survey. *Nurse Education Today* 2013;33(9):962-68.  
41  
42  
43 35. Humphris GM, Turner A. Job satisfaction and attitudes of nursing staff on a unit for the  
44  
45 elderly severely mentally infirm, with change of location. *Journal of Advanced Nursing*  
46  
47 1989;14(4):298.  
48  
49  
50  
51 36. Sung KT. Respect for Elders: Myths and Realities in East Asia. *Journal of Aging & Identity*  
52  
53 2000;5(4):197-205.  
54  
55  
56 37. Zhou X, Zhang J, Song X. Gender Discrimination in Hiring: Evidence from 19,130  
57  
58 Resumes in China. *Mpra Paper* 2013  
59  
60

- 1  
2  
3  
4 38. Shaffer MA, Joplin JRW, Bell MP, et al. Gender Discrimination and Job-Related  
5  
6 Outcomes: A Cross-Cultural Comparison of Working Women in the United States and  
7  
8  
9 China ☆☆☆. *Journal of Vocational Behavior* 2000;57(3):395-427.  
10  
11  
12 39. Lamb HR. Staff burnout in work with long-term patients. *Hospital & Community Psychiatry*  
13  
14 1979;30(6):396-8.  
15  
16  
17 40. P S. Interactions of nurses with elderly patients: relationship to nurses' attitudes and to  
18  
19 formal activity periods. *Journal of Advanced Nursing* 2010;18(1):14-19.  
20  
21  
22 41. Zuo H. Formal and Informal Employment in China: Probability of Employment and  
23  
24 Determinants of Monthly Wages. *Australian Economic Review* 2013;46(4):405-23.  
25  
26  
27 42. Idrees Z, Xinping X, Shafi K, et al. Effect of salary, training and motivation on job  
28  
29 performance of employees. *American Journal of Business, Economics and*  
30  
31 *Management* 2015;3(2):55-58.  
32  
33  
34  
35 43. Undergraduate Nursing Students and the Elderly: an Assessment of Attitudes in a Turkish  
36  
37 University. Apha Meeting and Exposition; 2017.  
38  
39  
40 44. Monnot MJ, Beehr TA. Subjective well-being at work: Disentangling source effects of  
41  
42 stress and support on enthusiasm, contentment, and meaningfulness. *Journal of*  
43  
44 *Vocational Behavior* 2014;85(2):204-18.  
45  
46  
47  
48 45. Li J, He Z, Luo Y, et al. Perceived Transcultural Self-Efficacy of Nurses in General  
49  
50 Hospitals in Guangzhou, China. *Nursing Research* 2016;65(5):371-79.  
51  
52  
53 46. Hendrix CC, Landerman R, Abernethy AP. Effects of an individualized caregiver training  
54  
55 intervention on self-efficacy of cancer caregivers. *West J Nurs Res*  
56  
57 2013;35(5):590-610.  
58  
59  
60

- 1  
2  
3  
4 47. Uysal A, Albayrak B, Koçulu B, et al. Attitudes of nursing students toward people with  
5  
6 disabilities. *Nurse Educ Today* 2014;34(5):878-84.  
7  
8  
9 48. Howell D, Butler L, Vincent L, et al. Influencing nurses' knowledge, attitudes, and practice  
10  
11 in cancer pain management. *Cancer Nursing* 2000;23(1):55.  
12  
13  
14 49. Pan HH, Shih HL, Wu LF, et al. Path modeling of knowledge, attitude and practice toward  
15  
16 palliative care consultation service among Taiwanese nursing staff: a cross-sectional  
17  
18 study. *Bmc Palliative Care* 2017;16(1):42.  
19  
20  
21  
22  
23  
24  
25  
26  
27  
28  
29  
30  
31  
32  
33  
34  
35  
36  
37  
38  
39  
40  
41  
42  
43  
44  
45  
46  
47  
48  
49  
50  
51  
52  
53  
54  
55  
56  
57  
58  
59  
60

**Figure1 legend:** The process for sample screening: 800 samples were filtered to 403

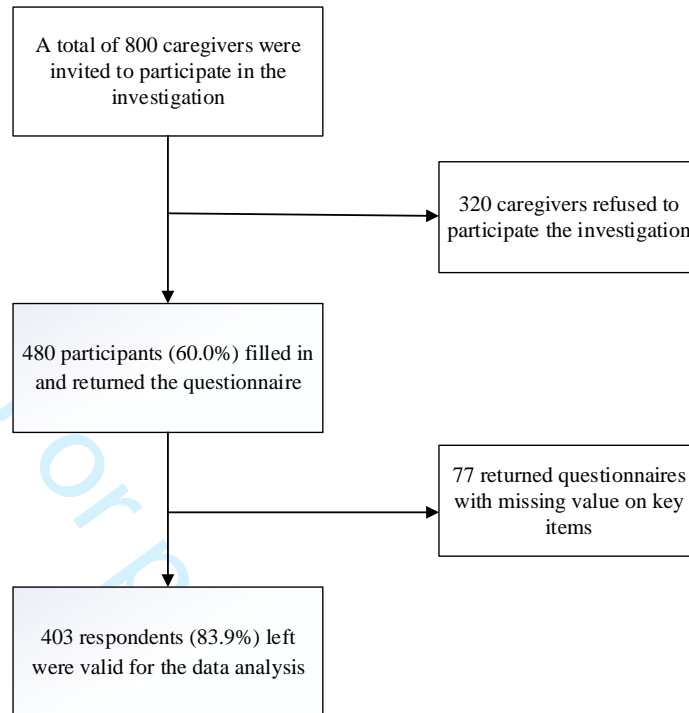

Figure 1 The process for sample screening



## Supplementary Table

Logistic regression models were established for sensitivity test by recoding the knowledge, attitude and self-efficacy scores into dichotomous variables (using average values as a cut-off point: encoding 1 for those greater than the mean, otherwise 0). Table 1 showed factors associated with knowledge, attitude and self-efficacy are same as the results from multivariable linear regression analyses.

Table 1 Results from logistic regression models

| Variables                    | FAQ 1 scores |                       |              | KAOP scores  |                       |              | Self-efficacy scores |                       |              |
|------------------------------|--------------|-----------------------|--------------|--------------|-----------------------|--------------|----------------------|-----------------------|--------------|
|                              | OR           | 95%CI                 | p            | OR           | 95%CI                 | p            | OR                   | 95%CI                 | p            |
| <b>Gender</b>                |              |                       |              |              |                       |              |                      |                       |              |
| Male                         | Ref.         |                       |              | Ref.         |                       |              | Ref.                 |                       |              |
| Female                       | 0.489        | (0.239, 1.004)        | 0.051        | <b>0.839</b> | <b>(0.042, 0.938)</b> | <b>0.023</b> | 1.191                | (0.579, 2.447)        | 0.635        |
| <b>Age(years)</b>            |              |                       |              |              |                       |              |                      |                       |              |
| 30-39                        | Ref.         |                       |              | Ref.         |                       |              | Ref.                 |                       |              |
| 40-49                        | 1.626        | (0.919, 2.877)        | 0.095        | 0.990        | (0.559, 1.754)        | 0.973        | 1.260                | (0.702, 2.262)        | 0.439        |
| 50≤                          | 0.840        | (0.547, 1.543)        | 0.573        | 1.221        | (0.666, 2.241)        | 0.518        | <b>1.810</b>         | <b>(1.069, 3.378)</b> | <b>0.003</b> |
| <b>Education level</b>       |              |                       |              |              |                       |              |                      |                       |              |
| Junior high school or below  | Ref.         |                       |              | Ref.         |                       |              | Ref.                 |                       |              |
| Secondary high school        | 0.917        | (0.471, 1.784)        | 0.799        | 1.013        | (0.589, 1.742)        | 0.963        | 0.894                | (0.511, 1.562)        | 0.693        |
| Bachelor degree or above     | <b>1.751</b> | <b>(1.009, 3.038)</b> | <b>0.046</b> | 0.889        | (0.459, 1.723)        | 0.728        | 1.143                | (0.585, 2.235)        | 0.696        |
| <b>Working tenure(years)</b> |              |                       |              |              |                       |              |                      |                       |              |
| 1-3                          | Ref.         |                       |              | Ref.         |                       |              | Ref.                 |                       |              |
| 4-6                          | 0.841        | (0.519, 1.363)        | 0.843        | 1.600        | (0.876, 2.925)        | 0.126        | 0.719                | (0.436, 1.184)        | 0.195        |
| 7≤                           | 0.662        | (0.339, 1.142)        | 0.125        | <b>0.628</b> | <b>(0.006, 0.835)</b> | <b>0.047</b> | 0.686                | (0.369, 1.276)        | 0.234        |
| <b>Ownership of NHs</b>      |              |                       |              |              |                       |              |                      |                       |              |
| Public                       | Ref.         |                       |              | Ref.         |                       |              | Ref.                 |                       |              |
| Private                      | 0.899        | (0.568, 1.423)        | 0.650        | 1.145        | (0.725, 1.808)        | 0.561        | 1.246                | (0.780, 1.989)        | 0.358        |
| <b>Work place</b>            |              |                       |              |              |                       |              |                      |                       |              |
| Urban                        | Ref.         |                       |              | Ref.         |                       |              | Ref.                 |                       |              |
| Rural                        | 1.130        | (0.729, 1.751)        | 0.584        | 0.899        | (0.582, 1.388)        | 0.630        | 0.891                | (0.569, 1.395)        | 0.613        |
| <b>Employment type</b>       |              |                       |              |              |                       |              |                      |                       |              |
| Informal employee            | Ref.         |                       |              | Ref.         |                       |              | Ref.                 |                       |              |
| Formal employee              | 1.130        | (0.729, 1.751)        | 0.869        | <b>1.694</b> | <b>(1.352, 2.887)</b> | <b>0.011</b> | 0.910                | (0.468, 1.773)        | 0.783        |
| <b>Monthly income (¥)</b>    |              |                       |              |              |                       |              |                      |                       |              |
| < 2000                       | Ref.         |                       |              | Ref.         |                       |              | Ref.                 |                       |              |
| 2000-3000                    | 1.100        | (0.688, 1.758)        | 0.691        | 0.758        | (0.477, 1.204)        | 0.241        | 1.052                | (0.650, 1.702)        | 0.838        |
| > 3000                       | 1.133        | (0.441, 1.986)        | 0.862        | <b>3.021</b> | <b>(1.330, 6.862)</b> | <b>0.008</b> | 1.163                | (0.540, 2.503)        | 0.700        |

**Pre-job training**

|     |              |                       |              |  |       |                |       |              |                       |                  |
|-----|--------------|-----------------------|--------------|--|-------|----------------|-------|--------------|-----------------------|------------------|
| No  | Ref.         |                       |              |  | Ref.  |                |       | Ref.         |                       |                  |
| Yes | <b>1.421</b> | <b>(1.065, 2.336)</b> | <b>0.043</b> |  | 1.022 | (0.626, 1.669) | 0.931 | <b>2.616</b> | <b>(1.548, 4.421)</b> | <b>&lt;0.001</b> |

**The health status of the elderly**

|                     |       |                |       |  |       |                |       |              |                       |              |
|---------------------|-------|----------------|-------|--|-------|----------------|-------|--------------|-----------------------|--------------|
| Complete disability | Ref.  |                |       |  | Ref.  |                |       | Ref.         |                       |              |
| Partial disability  | 1.226 | (0.337, 1.566) | 0.415 |  | 1.440 | (0.665, 3.118) | 0.354 | <b>1.225</b> | <b>(1.097, 2.700)</b> | <b>0.001</b> |
| No disability       | 1.151 | (0.339, 1.665) | 0.481 |  | 1.301 | (0.586, 2.889) | 0.581 | <b>1.330</b> | <b>(1.139, 2.798)</b> | <b>0.012</b> |

**Interest in working with the aged**

|     |       |                |       |  |              |                       |              |              |                       |              |
|-----|-------|----------------|-------|--|--------------|-----------------------|--------------|--------------|-----------------------|--------------|
| No  | Ref.  |                |       |  | Ref.         |                       |              | Ref.         |                       |              |
| Yes | 1.307 | (0.707, 2.418) | 0.393 |  | <b>2.069</b> | <b>(1.105, 3.873)</b> | <b>0.023</b> | <b>1.381</b> | <b>(1.021, 2.646)</b> | <b>0.030</b> |

**Job Satisfaction**

|                     |              |                       |              |  |        |                |       |              |                       |              |
|---------------------|--------------|-----------------------|--------------|--|--------|----------------|-------|--------------|-----------------------|--------------|
| Not satisfied       | Ref.         |                       |              |  | Ref.   |                |       | Ref.         |                       |              |
| Generally satisfied | <b>2.481</b> | <b>(1.053, 5.846)</b> | <b>0.038</b> |  | 1.878  | (0.804, 4.384) | 0.145 | 1.439        | (0.576, 3.592)        | 0.435        |
| Very satisfied      | <b>2.137</b> | <b>(1.915, 4.991)</b> | <b>0.035</b> |  | 1.668  | (0.719, 3.871) | 0.234 | <b>1.905</b> | <b>(1.072, 4.699)</b> | <b>0.041</b> |
| $\chi^2$            | 35.118       |                       | 0.014        |  | 33.362 |                | 0.015 | 46.818       |                       | <0.001       |
| $R^2$               | 0.111        |                       |              |  | 0.106  |                |       | 0.147        |                       |              |

Note: Figures in bold indicate coefficients with statistical significance

**STROBE 2007 (v4) Statement—Checklist of items that should be included in reports of *cross-sectional studies***

| Section/Topic                | Item # | Recommendation                                                                                                                                                                       | Reported on page # |
|------------------------------|--------|--------------------------------------------------------------------------------------------------------------------------------------------------------------------------------------|--------------------|
| <b>Title and abstract</b>    | 1      | (a) Indicate the study's design with a commonly used term in the title or the abstract                                                                                               | Page1              |
|                              |        | (b) Provide in the abstract an informative and balanced summary of what was done and what was found                                                                                  | Page2-3            |
| <b>Introduction</b>          |        |                                                                                                                                                                                      |                    |
| Background/rationale         | 2      | Explain the scientific background and rationale for the investigation being reported                                                                                                 | Page4-5            |
| Objectives                   | 3      | State specific objectives, including any prespecified hypotheses                                                                                                                     | Page5              |
| <b>Methods</b>               |        |                                                                                                                                                                                      |                    |
| Study design                 | 4      | Present key elements of study design early in the paper                                                                                                                              | Page5-6            |
| Setting                      | 5      | Describe the setting, locations, and relevant dates, including periods of recruitment, exposure, follow-up, and data collection                                                      | Page6              |
| Participants                 | 6      | (a) Give the eligibility criteria, and the sources and methods of selection of participants                                                                                          | Page6              |
| Variables                    | 7      | Clearly define all outcomes, exposures, predictors, potential confounders, and effect modifiers. Give diagnostic criteria, if applicable                                             | Page7              |
| Data sources/<br>measurement | 8*     | For each variable of interest, give sources of data and details of methods of assessment (measurement). Describe comparability of assessment methods if there is more than one group | Page7              |
| Bias                         | 9      | Describe any efforts to address potential sources of bias                                                                                                                            | Page6              |
| Study size                   | 10     | Explain how the study size was arrived at                                                                                                                                            | Page6              |
| Quantitative variables       | 11     | Explain how quantitative variables were handled in the analyses. If applicable, describe which groupings were chosen and why                                                         | Page7-8            |
| Statistical methods          | 12     | (a) Describe all statistical methods, including those used to control for confounding                                                                                                | Page8              |
|                              |        | (b) Describe any methods used to examine subgroups and interactions                                                                                                                  | Page8              |
|                              |        | (c) Explain how missing data were addressed                                                                                                                                          | Page6              |
|                              |        | (d) If applicable, describe analytical methods taking account of sampling strategy                                                                                                   | Not applicable     |
|                              |        | (e) Describe any sensitivity analyses                                                                                                                                                | Not applicable     |
| <b>Results</b>               |        |                                                                                                                                                                                      |                    |

|                          |     |                                                                                                                                                                                                              |                |
|--------------------------|-----|--------------------------------------------------------------------------------------------------------------------------------------------------------------------------------------------------------------|----------------|
| Participants             | 13* | (a) Report numbers of individuals at each stage of study—eg numbers potentially eligible, examined for eligibility, confirmed eligible, included in the study, completing follow-up, and analysed            | Page9-11       |
|                          |     | (b) Give reasons for non-participation at each stage                                                                                                                                                         | Not applicable |
|                          |     | (c) Consider use of a flow diagram                                                                                                                                                                           | Not applicable |
| Descriptive data         | 14* | (a) Give characteristics of study participants (eg demographic, clinical, social) and information on exposures and potential confounders                                                                     | Page9-11       |
|                          |     | (b) Indicate number of participants with missing data for each variable of interest                                                                                                                          | Not applicable |
| Outcome data             | 15* | Report numbers of outcome events or summary measures                                                                                                                                                         | Page9          |
| Main results             | 16  | (a) Give unadjusted estimates and, if applicable, confounder-adjusted estimates and their precision (eg, 95% confidence interval). Make clear which confounders were adjusted for and why they were included | Page 12-15     |
|                          |     | (b) Report category boundaries when continuous variables were categorized                                                                                                                                    | Not applicable |
|                          |     | (c) If relevant, consider translating estimates of relative risk into absolute risk for a meaningful time period                                                                                             | Not applicable |
| Other analyses           | 17  | Report other analyses done—eg analyses of subgroups and interactions, and sensitivity analyses                                                                                                               | Not applicable |
| <b>Discussion</b>        |     |                                                                                                                                                                                                              |                |
| Key results              | 18  | Summarise key results with reference to study objectives                                                                                                                                                     | Page15         |
| Limitations              | 19  | Discuss limitations of the study, taking into account sources of potential bias or imprecision. Discuss both direction and magnitude of any potential bias                                                   | Page17         |
| Interpretation           | 20  | Give a cautious overall interpretation of results considering objectives, limitations, multiplicity of analyses, results from similar studies, and other relevant evidence                                   | Page15-17      |
| Generalisability         | 21  | Discuss the generalisability (external validity) of the study results                                                                                                                                        | Page 18        |
| <b>Other information</b> |     |                                                                                                                                                                                                              |                |
| Funding                  | 22  | Give the source of funding and the role of the funders for the present study and, if applicable, for the original study on which the present article is based                                                | Page19         |

\*Give information separately for cases and controls in case-control studies and, if applicable, for exposed and unexposed groups in cohort and cross-sectional studies.

**Note:** An Explanation and Elaboration article discusses each checklist item and gives methodological background and published examples of transparent reporting. The STROBE checklist is best used in conjunction with this article (freely available on the Web sites of PLoS Medicine at <http://www.plosmedicine.org/>, Annals of Internal Medicine at <http://www.annals.org/>, and Epidemiology at <http://www.epidem.com/>). Information on the STROBE Initiative is available at [www.strobe-statement.org](http://www.strobe-statement.org).

# BMJ Open

## Knowledge, attitude and self-efficacy of elderly caregivers in Chinese nursing homes: a cross-sectional study in Liaoning province

|                                 |                                                                                                                                                                   |
|---------------------------------|-------------------------------------------------------------------------------------------------------------------------------------------------------------------|
| Journal:                        | <i>BMJ Open</i>                                                                                                                                                   |
| Manuscript ID                   | bmjopen-2019-029869.R3                                                                                                                                            |
| Article Type:                   | Original research                                                                                                                                                 |
| Date Submitted by the Author:   | 05-Oct-2019                                                                                                                                                       |
| Complete List of Authors:       | Zhang, Huijun; Tianjin University, School of Pharmaceutical Science and Technology; Jinzhou Medical University, School of Nursing<br>Sun, He; Tianjin University, |
| <b>Primary Subject Heading</b>: | Nursing                                                                                                                                                           |
| Secondary Subject Heading:      | Occupational and environmental medicine                                                                                                                           |
| Keywords:                       | knowledge, attitude, self-efficacy, elderly caregivers, nursing homes, China                                                                                      |
|                                 |                                                                                                                                                                   |

SCHOLARONE™  
Manuscripts

1  
2  
3 **Knowledge, attitude and self-efficacy of elderly caregivers in Chinese nursing**  
4 **homes: A cross-sectional study in Liaoning province**  
5  
6

7  
8 **Huijun Zhang**  
9

10 Affiliated institution: 1, School of Pharmaceutical Science and Technology, Tianjin  
11  
12 University, Tianjin, China; 2, School of Nursing, Jinzhou Medical University,  
13  
14 Jinzhou, Liaoning province, China  
15

16  
17  
18 E-mail: [13904069606@163.com](mailto:13904069606@163.com)  
19  
20

21  
22  
23 **He Sun ( Corresponding author )**  
24

25  
26 Affiliated institution: School of Pharmaceutical Science and Technology, Tianjin  
27  
28 University, Tianjin, China  
29

30  
31 E-mail: [18768429445@163.com](mailto:18768429445@163.com)  
32  
33  
34  
35  
36  
37  
38  
39  
40  
41  
42  
43  
44  
45  
46  
47  
48  
49  
50  
51  
52  
53  
54  
55  
56  
57  
58  
59  
60

## Abstract

**Objectives** This study aimed to investigate the perceptions of elderly caregivers in Chinese nursing homes (NHs) and associated factors with regard to knowledge, attitude about elderly and self-efficacy.

**Setting** A cross-sectional questionnaire survey was conducted on 12 NHs in Liaoning province, China.

**Participants** A total of 403 caregivers from 12 NHs were surveyed.

**Outcome measures** Data were collected using a self-administered questionnaire composed of the Palmore's Facts on Aging Quiz I, the Kogan's Attitude Old People Scale, Generalised Self-efficacy Scale and background characteristics of participants. An average score for knowledge, attitude and self-efficacy was calculated. Differences across groups were evaluated using Student's *t*-test and ANOVA. Multivariable linear regression models were established to estimate the associated factors.

**Results** The participating caregivers reported a relative low score on knowledge about the elderly (10.42±2.79), attitude toward old people (127.85±14.36) and self-efficacy (27.12±4.9). Multivariable regression analysis showed that respondents who had high educational level ( $\beta=0.212$ , 95% CI: 0.193 to 0.824), received pre-job training ( $\beta=0.193$ , 95%CI: 0.081 to 1.169) and had high job satisfaction (general satisfaction:  $\beta=0.345$ , 95%CI: 0.223 to 1.875; very satisfaction:  $\beta=0.322$ , 95%CI: 0.210 to 1.283) gave a positive rating on knowledge. Caregivers who were employed as formal staff ( $\beta=0.155$ , 95%CI: 0.116 to 1.670), earned a high income ( $\beta=0.214$ , 95%CI: 0.117 to 1.461) and had an interest in working with the elderly ( $\beta=0.141$ , 95%CI: 0.088 to 1.508) tended to develop a positive attitude towards the elderly. However,

1  
2  
3  
4 caregivers who were female ( $\beta=-0.110, 95\%CI: -1.751$  to  $-0.080$ ) and had long work experience  
5  
6 ( $\beta=-0.130, 95\%CI: -1.527$  to  $-0.110$ ) developed negative perception. Caregivers who were older  
7  
8 ( $\beta=0.215, 95\% CI: 0.139$  to  $1.027$ ), received pre-job training ( $\beta=0.143, 95\%CI: 0.113$  to  $1.024$ ),  
9  
10 had an interest in working with the elderly ( $\beta=0.154, 95\%CI: 0.114$  to  $1.015$ ), had high job  
11  
12 satisfaction ( $\beta=0.177, 95\%CI: 0.116$  to  $1.223$ ) and perceived better health status for the elderly  
13  
14 (partial disability: $\beta=0.437, 95\%CI: 0.259$  to  $1.600$ ; no disability:  $\beta=0.288, 95\% CI: 0.153$  to  
15  
16  $1.211$ ) gave a positive rating on self-efficacy.  
17  
18  
19  
20  
21

## 22 **Conclusion**

23  
24 Knowledge about the elderly, attitude toward old people and self-efficacy of elderly caregivers in  
25  
26 Chinese NHs were at low levels. Some targeted intervention programs, such as conducting a  
27  
28 professional training for aged care and a performance-based payment system, should be given a  
29  
30 priority for improving these attributes.  
31  
32  
33  
34  
35  
36  
37

## 38 **Strengths and limitations of this study**

- 39  
40  
41  
42  
43  
44  
45  
46  
47  
48  
49  
50  
51  
52  
53  
54  
55  
56  
57  
58  
59  
60
- This study is amongst the first to understand the perception of caregivers in Chinese nursing homes on knowledge about aging, attitude toward the elderly and self-efficacy.
  - Multivariable linear regression models were established and used to identify multifaceted factors associated with the perceived knowledge, attitude and self-efficacy of caregivers.
  - Using widely accepted scales (FAQ 1, KAOP and GSE) for data collection contributed to the reliability of the results.
  - The samples were collected from only one province located in the north-eastern region of China. Caution needs to be taken when generalising the findings to China or other countries.



## Introduction

Population ageing has been highlighted worldwide, especially in China. According to the National Bureau of Statistics of China (2017), the elderly population aged 60 years and higher has reached 240 million, accounting for 17.3% of the total population<sup>1 2</sup>. By 2050, this number is expected to increase up to 450 million, accounting for 33% of the total population<sup>3</sup>. Hence, China will become the country with the largest number of old people in the world. Such growth in population aging will result in significantly increased needs for long-term care.

Influenced by traditional Chinese culture, elderly people prefer to live with their children, and taking care for the elderly is regarded as the responsibility of the family<sup>4</sup>. However, the rising migration from rural to urban areas, especially amongst young people, and the shrinking average family size due to China's one-child policy<sup>5 6</sup> have changed the mainstream informal family-based caregiving model for older adults. Consequently, old people are being sent to nursing homes (NHs) for professional aged care.

Over the past few years, the Chinese government made a great effort to support the development of the aged care service industry and invested into NHs. Approximately 155,000 different types of NHs exist across Mainland China and include old age homes, retirement departments, residential care facilities, welfare institutes and geriatric hospitals. However, health workers in NHs have shortage of or lack formal vocational training<sup>3</sup>. As a result, low-level caregiving skills and poor health care quality become an urgent issue and have attracted a wide range of attention<sup>7 8</sup>.

Although the Chinese government launched the 'Basic Standards for Service Quality of Aged Agencies' in 2017, the quality of nursing services for the elderly is still not guaranteed<sup>9</sup>. Providing high-quality aged care services seem to pose a huge challenge in coping with China's aging

1  
2  
3  
4 society.

5  
6 Elderly caregivers in NHs, as the front-line health care workers, spend considerable time with old  
7  
8  
9 people and have a direct effect on healthcare delivery<sup>10</sup>. However, holding a negative attitude and  
10  
11  
12 misunderstanding about aging often create an adverse impact on provision of health care  
13  
14  
15 behaviour and ultimately lead to poor health outcomes<sup>11 12</sup>. In addition to attitude and knowledge,  
16  
17 self-efficacy which is defined as ‘people’s beliefs about their capabilities to exercise control over  
18  
19 events that affect their lives’<sup>13</sup> is another widely recognised factor associated with health workers’  
20  
21  
22 behaviour in care delivery. In general, high self-efficacy is associated with positive feelings about  
23  
24  
25 one’s self, which facilitate cognitive processes and work achievement as well as confidence and  
26  
27  
28 motivation<sup>14</sup>. Therefore, giving an emphasis on knowledge, attitude and self-efficacy of caregivers  
29  
30 is beneficial in providing high-quality aged care services.

31  
32  
33 Many studies conducted in Western countries revealed that social workers, healthcare workers and  
34  
35  
36 nursing students tend to have poor attitude, misconception, inadequate knowledge and lowest  
37  
38  
39 priority to consider working with elderly<sup>15-18</sup>. However, there is paucity in the literature involved  
40  
41  
42 in low- and middle-income Asian countries, including China. Understanding the knowledge,  
43  
44  
45 attitude and self-efficacy of elderly caregivers in NHs and the significant increase in needs for  
46  
47  
48 aged care in China has practical significance.

49  
50  
51 This study aimed to investigate the perceptions of caregivers on knowledge about aging, attitude  
52  
53  
54 toward the elderly and self-efficacy and their associated factors.

## 55 56 **Method**

### 57 58 **Setting and sampling**

1  
2  
3  
4 A cross-sectional quantitative survey was conducted on Liaoning province located in the  
5  
6 north-eastern region of China, where people aged over 60 years account for 22.65% of the total  
7  
8 population<sup>19</sup>.

9  
10  
11 We adopted a multistage sampling strategy. Firstly, three cities were selected from three different  
12  
13 geographical zones, namely, Shenyang representing central, Jinzhou representing west and  
14  
15 Dandong representing east. Four NHs (two for large size, two for small size) were selected  
16  
17 randomly in each city according to their organisation code. Twelve NHs were selected to  
18  
19 participate. Finally, half of the caregivers were considered as samples in each selected NH.

20  
21  
22 Data were collected from November 1, 2015 to May 31, 2016. Two to four trained investigators  
23  
24 assigned to each selected NH were required to invite caregivers working in different departments.

25  
26  
27 The participants were asked to provide informed consent letter and oral consent before they filled  
28  
29 out the questionnaires and the questionnaires were given to the investigators right after  
30  
31 completion. We approached potential participants across the entire working time and selected a  
32  
33 half of caregivers in each nursing home to maximise the chance of capturing a representative  
34  
35 sample.

36  
37  
38 Considering that NH has no standardised definition in Mainland China, this study defined it as an  
39  
40 institution included in residential long-term care facilities in Mainland China that mainly admit  
41  
42 people aged 60 years or higher. A qualified elderly caregiver usually needs to receive 3–5 years of  
43  
44 professional training in China. In this study, caregivers who had direct contact with the elderly  
45  
46 were eligible to participate in the investigation. These caregivers included physicians, nurses and  
47  
48 allied health workers. Participants should have worked in the selected NHs for more than 1 year  
49  
50 and voluntarily participated in the survey.

1  
2  
3  
4 Approximately 800 caregivers were invited to participate in this investigation, and 480  
5  
6 participants (60%) filled in and returned the questionnaires. We recorded the reasons for  
7  
8 non-participation. Overall, these people had an idea about the purpose of our study or no time to  
9  
10 participate in the survey. After excluding questionnaires with uncompleted key items, 403 (83.9%)  
11  
12 were considered valid for data analysis (Figure 1).  $\alpha$  level (type I error rate) at 0.05 and  $\beta$  level  
13  
14 (statistical power) at 0.8 were used to conduct a power analysis. We found such sample size is  
15  
16 enough large for data analysis. According to formula proposed by Peduzzi et al.<sup>20 21</sup>, the minimum  
17  
18 sample size is at least  $10 \times K$ , where  $K$  is the number of predictors in the regression model. This  
19  
20 sample size would also be sufficiently large for multivariable linear regression analyses for a  
21  
22 model containing 18 dichotomous independent variables (Table 1).  
23  
24  
25  
26  
27  
28

29  
30 **(Figure 1 should be here)**  
31

### 32 **Measurement**

33  
34 We adopted Palmore's Facts on Aging Quiz I (FAQ I), the Kogan's Attitude Old People Scale  
35  
36 (KAOP) and Generalised Self-efficacy Scale (GSE) to measure knowledge about old people,  
37  
38 attitude toward the elderly and self-efficacy of caregivers, respectively. Data about characteristics  
39  
40 of the caregivers and their work environments were also collected by a self-developed  
41  
42 questionnaire.  
43  
44  
45  
46  
47

48  
49 FAQ I developed by Palmore (1990) has been widely used to assess the subjects' (including  
50  
51 caregivers) physical, mental and social knowledge about aging as well as some of the most  
52  
53 common misconceptions about aging<sup>15 22</sup>. FAQ I is composed of 25 statements, such as 'old  
54  
55 people tend to react slower than young people' and 'old people are not as efficient as young  
56  
57 people.' The participants responded by stating whether a statement is true (T) or false (F); a score  
58  
59  
60

1  
2  
3  
4 of 1 is assigned if the answer is right, otherwise the score is 0. Therefore, the total scores range  
5  
6 from 0 to 25, with a high score representing high knowledge about the elderly. The Chinese  
7  
8 version of FAQ 1 introduced by Wang et al.<sup>23</sup> has adequate reliability (Cronbach's  $\alpha=0.68$ ).  
9

10  
11 KAOP, which is developed by Kogan in 1961, has been used to measure attitude towards the  
12  
13 elderly in many studies. This scale contains 34 items with 17 negative (KAOP-) and 17 (KAOP+)  
14  
15 positive statements. Examples of the statements are as follows: 'most the elderly gets set in their  
16  
17 ways and are unable to change,' and 'it is very easy to get on with the elderly.' Each item is scored  
18  
19 using a six-point Likert scale (strongly disagree=1, disagree=2, slightly disagree=3, slightly  
20  
21 agree=5 and strongly agree=6). The scores on the statement presented negatively should be  
22  
23 reversed to estimate the total score. The total scores for the KAOP range from 34 to 204, with high  
24  
25 scores representing positive attitude towards the elderly<sup>24</sup>. For the Chinese version of KAOP, the  
26  
27 Cronbach's  $\alpha$  is 0.82 for the total scale, indicating that it is a fully reliable instrument<sup>25</sup>.  
28  
29

30  
31  
32  
33  
34  
35 GSE, which was developed by Zhang and Schwarzer in 1995, is used widely to measure a general  
36  
37 sense of perceived self-efficacy<sup>26</sup>. The 10 items of the GSE are scored on a four-point scale (not  
38  
39 at all true=1, hardly true=2, moderately true=3 and exactly true=4). The total scores range from 10  
40  
41 to 40, with a high score indicating high self-efficacy. A Cronbach's  $\alpha$  value of 0.89 for the  
42  
43 Chinese version of the GSE indicates that this instrument has high reliability for the study  
44  
45 population<sup>2</sup>.  
46  
47  
48  
49

50  
51 In the last part of the questionnaire, some close-ended questions were designed to collect  
52  
53 information about the background characteristics of the participating caregivers and their work  
54  
55 environment. General demographic characteristics including age, gender and educational level  
56  
57 were also investigated (Table 1). Various questions about caregivers' work environment were also  
58  
59  
60

1  
2  
3  
4 asked. These questions include the following examples: ‘how many years have you been working  
5  
6 in this NH (work tenure)’ and ‘is your NH public or private (ownership of NH); located in rural or  
7  
8 urban (work place)’ (Table 1). The employment type of caregivers in Chinese NHs includes  
9  
10 formal and informal employees. Formal employees are hired by the government, and their wages  
11  
12 are paid by the National Finance Department. Informal employees are caregivers who signed the  
13  
14 labour contract with NHs, and their wages come from the profits of the institution<sup>27</sup>. We also  
15  
16 obtained information on pre-job training (yes/no), interest in working with the elderly (yes/no) and  
17  
18 job satisfaction (not /generally/very satisfied). Meanwhile, we measured the perceived health  
19  
20 status of the elderly from caregivers by asking ‘how rate overall health status of the elderly who  
21  
22 you served in the past month (complete/partial/with no disability)’ (Table 1). These factors were  
23  
24 identified as independent variables in the regression model<sup>15 28 29</sup>.

### 35 **Data analysis**

36  
37 Scores on each item of FAQ 1, KAOP and GSE were added. According to the guidance on the use  
38  
39 of each scale, every item was given the same weight<sup>23 26 30</sup>. Average score was calculated to  
40  
41 evaluate the levels of knowledge, attitude and self-efficacy.  
42  
43

44  
45 The Kolmogorov–Smirnov test showed that the *p*-values for knowledge, attitude and self-efficacy  
46  
47 scores exceeded 0.10; as such, data of these variables were normally distributed. Student’s *t*-test  
48  
49 (for two-group comparisons) or ANOVA (for multiple group comparisons) was performed to  
50  
51 determine statistical differences in scores across different groups. Multivariable linear regression  
52  
53 models were established to identify factors associated with knowledge, attitude and self-efficacy  
54  
55 scores, and serving the characteristics of respondents as independent variables.  
56  
57  
58  
59  
60

1  
2  
3  
4 In model establishment, we used the ENTER approach (all independent variables are forced into  
5  
6 the regression models) because of two reasons: first, we tend to explain the variations in  
7  
8 knowledge, attitude and self-efficacy scores instead of predicting them. This approach allowed us  
9  
10 to observe the parameters of these factors that are not significantly associated with the dependent  
11  
12 variables. Second, all independent variables in the model have been studied in other countries<sup>15 28</sup>.  
13  
14 To compare our results with those reported in other countries, we added all independent variables  
15  
16 into the regression model. In order to assess fit of the regression models, we used plots of  
17  
18 residuals against the covariates (Supplementary Figure 1-3). We also conducted logistic regression  
19  
20 analyses for sensitivity test by recoding the knowledge, attitude and self-efficacy scores into  
21  
22 dichotomous variables (Supplementary Table).  
23  
24  
25  
26  
27  
28

29  
30 A double entry strategy was adopted to ensure the accuracy of data input by using EpiData 3.1.

31  
32 All statistical analyses were performed using IBM SPSS Statistics V.22.0.  
33  
34

### 35 36 **Patient and Public Involvement**

37  
38 This study focused on knowledge about aging, attitude towards the elderly and self-efficacy; thus,  
39  
40 patients were not directly involved in the survey.  
41  
42  
43  
44

## 45 46 **Results**

### 47 48 **Characteristics of respondents**

49  
50 Of the 403 respondents, 89.8% were female. A total of 70.5% of the respondents aged more than  
51  
52 40 years. Only 20.3% of the caregivers had bachelor's degree or above. More than half of  
53  
54 respondents had working tenure of <3 years (55.1%) and worked in urban setting (61.8%). The  
55  
56 majority of the participants (86.8%) were employed as informal employees. Only 10.7% earned a  
57  
58  
59  
60

monthly income of >3000 Chinese yuan. A total of 68.0% and 85.4% of respondents reported that they received pre-job training and had an interest in elderly care, respectively (Table 1).

### Knowledge, attitude toward the elderly and self-efficacy

Overall, relatively low scores for knowledge (10.42±2.79), attitude (127.85±14.36) and self-efficacy (27.12±4.91) were measured by FAQ 1, KAOP and GSE, respectively, amongst caregivers in NHs.

Table 1 shows the differences in the scores of knowledge, attitude and self-efficacy rated by caregivers with different characteristics. Male respondents gave higher scores on attitude than female ones ( $p<0.05$ ). Older caregivers showed higher self-efficacy than younger ones ( $p<0.05$ ). Respondents with middle educational level gave higher scores on knowledge than the two other groups ( $p<0.05$ ). Caregivers working in public NHs had high scores on knowledge and attitude ( $p<0.05$ ). Formal employees showed better performance in terms of knowledge, attitude and self-efficacy ( $p<0.05$ ). Scores for attitude increased with increasing monthly salary ( $p<0.001$ ). Participants who received pre-job training reported high scores for knowledge and self-efficacy ( $p<0.05$ ). Respondents interested in elderly care gave high scores for attitude and self-efficacy ( $p<0.05$ ). Scores for the three domains varied across different job satisfaction levels ( $p<0.05$ ).

Table 1 Differences in knowledge, attitude and self-efficacy scores amongst different characteristics of caregivers

| Variables     | N (%)             | FAQ 1 scores |                 | KAOP scores  |                 | Self-efficacy scores |                 |
|---------------|-------------------|--------------|-----------------|--------------|-----------------|----------------------|-----------------|
|               |                   | Mean ± SD    | <i>p</i> -Value | Mean ± SD    | <i>p</i> -Value | Mean ± SD            | <i>p</i> -Value |
| <b>Gender</b> |                   |              | 0.055           |              | 0.034           |                      | 0.890           |
|               | Male 41 (10.2)    | 11.22±3.09   |                 | 132.30±15.75 |                 | 27.02±4.21           |                 |
|               | Female 362 (89.8) | 10.33±2.75   |                 | 127.31±14.13 |                 | 27.13±4.98           |                 |



|                               |                             |            |            |  |              |  |            |
|-------------------------------|-----------------------------|------------|------------|--|--------------|--|------------|
| <b>Age (years)</b>            |                             |            | 0.070      |  | 0.909        |  | 0.004      |
|                               | 30–39                       | 119 (29.5) | 10.37±2.70 |  | 128.22±14.13 |  | 26.33±4.19 |
|                               | 40–49                       | 141 (35.0) | 10.83±2.96 |  | 127.93±15.07 |  | 26.70±5.41 |
|                               | ≤50                         | 143 (35.5) | 10.07±2.66 |  | 127.45±13.93 |  | 28.18±4.79 |
| <b>Educational level</b>      |                             |            | 0.046      |  | 0.276        |  | 0.927      |
|                               | Junior high school or below | 225 (55.8) | 10.23±2.90 |  | 126.93±13.78 |  | 27.09±4.83 |
|                               | Secondary high school       | 96 (23.8)  | 11.04±2.77 |  | 129.72±14.08 |  | 27.03±5.20 |
|                               | Bachelor degree or above    | 82 (20.3)  | 10.23±2.44 |  | 128.16±16.11 |  | 27.30±4.81 |
| <b>Work tenure (years)</b>    |                             |            | 0.858      |  | 0.172        |  | 0.355      |
|                               | 1–3                         | 222 (55.1) | 10.47±2.87 |  | 129.70±15.43 |  | 27.44±5.02 |
|                               | 4–6                         | 114 (28.3) | 10.44±2.81 |  | 128.55±10.61 |  | 26.76±4.64 |
|                               | ≤7                          | 67 (16.6)  | 10.25±2.53 |  | 126.68±14.72 |  | 26.68±4.96 |
| <b>Nursing home ownership</b> |                             |            | 0.033      |  | 0.032        |  | 0.708      |
|                               | Public                      | 132 (32.8) | 14.24±2.99 |  | 133.94±15.91 |  | 26.99±4.61 |
|                               | Private                     | 271 (67.2) | 10.51±2.69 |  | 127.80±13.58 |  | 27.18±5.05 |
| <b>Work place</b>             |                             |            | 0.127      |  | 0.862        |  | 0.296      |
|                               | Urban                       | 249 (61.8) | 10.26±2.84 |  | 127.94±15.20 |  | 27.32±4.96 |
|                               | Rural                       | 154 (38.2) | 10.69±2.71 |  | 127.69±12.95 |  | 26.78±4.82 |
| <b>Employment type</b>        |                             |            | 0.037      |  | 0.011        |  | 0.042      |
|                               | Informal employee           | 350 (86.8) | 10.24±2.81 |  | 127.05±14.20 |  | 25.33±4.47 |
|                               | Formal employee             | 53 (13.2)  | 15.40±2.56 |  | 135.63±15.96 |  | 27.66±5.22 |
| <b>Monthly income (¥)</b>     |                             |            | 0.466      |  | <0.001       |  | 0.975      |

1  
2  
3  
4  
5  
6  
7  
8  
9  
10  
11  
12  
13  
14  
15  
16  
17  
18  
19  
20  
21  
22  
23  
24  
25  
26  
27  
28  
29  
30  
31  
32  
33  
34  
35  
36  
37  
38  
39  
40  
41  
42  
43  
44  
45  
46  
47  
48  
49  
50  
51  
52  
53  
54  
55  
56  
57  
58  
59  
60

|                                                |                     |            |            |              |            |
|------------------------------------------------|---------------------|------------|------------|--------------|------------|
|                                                | <2000               | 160 (39.7) | 10.21±2.81 | 126.52±15.21 | 27.05±5.24 |
|                                                | 2000–3000           | 200 (49.6) | 10.56±2.74 | 127.13±12.71 | 27.16±4.91 |
|                                                | >3000               | 43 (10.7)  | 10.60±3.00 | 136.11±15.59 | 27.18±3.51 |
| <b>Pre-job training</b>                        |                     |            | 0.040      | 0.106        | 0.001      |
|                                                | No                  | 129 (32.0) | 10.01±2.95 | 126.16±14.38 | 25.91±4.62 |
|                                                | Yes                 | 274 (68.0) | 10.62±2.70 | 128.64±14.31 | 27.69±4.94 |
| <b>Health status of the elderly</b>            |                     |            | 0.868      | 0.602        | <0.001     |
|                                                | Complete disability | 34 (8.4)   | 10.21±2.21 | 125.49±14.11 | 26.32±4.34 |
|                                                | Partial disability  | 219 (54.3) | 10.42±2.79 | 127.98±13.50 | 27.62±5.17 |
|                                                | No disability       | 150 (37.2) | 10.49±2.92 | 128.19±15.63 | 30.64±5.41 |
| <b>Interest in working with elderly people</b> |                     |            | 0.273      | 0.019        | 0.022      |
|                                                | No                  | 58 (14.4)  | 9.88±2.72  | 123.74±14.15 | 25.68±4.66 |
|                                                | Yes                 | 344 (85.4) | 10.51±2.80 | 128.60±14.28 | 27.34±4.91 |
| <b>Job satisfaction</b>                        |                     |            | 0.001      | 0.033        | 0.001      |
|                                                | Not satisfied       | 34 (8.4)   | 8.68±2.77  | 121.97±16.80 | 25.14±5.42 |
|                                                | Generally satisfied | 151 (37.5) | 10.66±2.49 | 127.70±13.29 | 26.42±4.94 |
|                                                | Very satisfied      | 218 (54.1) | 10.54±2.91 | 128.86±14.51 | 27.91±4.66 |

**Factors associated with knowledge, attitude and self-efficacy: results of multivariable linear regression analyses**

Table 2 shows the results of the three multivariable linear regression models for analysis of factors associated with knowledge, attitude and self-efficacy.

**Knowledge about older people**

1  
2  
3  
4 Respondents with bachelor's degree or above ( $\beta=0.212$ , 95% CI: 0.193 to 0.824) gave higher  
5  
6 scores in FAQ I than those who completed junior high school or below. People who received  
7  
8 pre-job training ( $\beta=0.193$ , 95% CI: 0.081 to 1.169) were more likely to report high scores for  
9  
10 knowledge. But this result could have the uncertainty due to a wide confidence interval. Those  
11  
12 who were generally ( $\beta=0.345$ , 95% CI: 0.223 to 1.875) and very satisfied ( $\beta=0.322$ , 95% CI:  
13  
14 0.210 to 1.283 ) with their jobs also gave a positive rating on knowledge.  
15  
16  
17  
18

### 19 **Attitudes toward older people**

20  
21  
22 The attitude scores in KAOP were high for those who were employed as formal employee  
23  
24 ( $\beta=0.155$ , 95% CI: 0.116 to 1.670), earned high wages ( $\beta=0.214$ , 95% CI: 0.117 to 1.461) and had  
25  
26 an interest in working with aged people ( $\beta=0.141$ , 95% CI: 0.088 to 1.508). However, it was  
27  
28 assumed that the association between KAOP scores and interest in working with aged people was  
29  
30 not stable because 95% confidence interval was relatively wide. Additionally, female ( $\beta=-0.110$ ,  
31  
32 95% CI: -1.751 to -0.080) and respondents with more than 7 years of work experience  
33  
34 ( $\beta=-0.130$ , 95% CI: -1.527 to -0.110) reported low scores.  
35  
36  
37  
38  
39

### 40 **Self-efficacy**

41  
42  
43 A high self-efficacy score in GSE was observed in caregivers who were older ( $\beta=0.215$ , 95% CI:  
44  
45 0.139 to 1.027), received pre-job training ( $\beta=0.143$ , 95% CI: 0.113 to 1.024), had interest in  
46  
47 working with the elderly ( $\beta=0.154$ , 95% CI: 0.114 to 1.015), had high job satisfaction ( $\beta=0.177$ ,  
48  
49 95% CI: 0.116 to 1.223). In addition, better health status of the elderly (partial disability:  $\beta=0.437$ ,  
50  
51 95% CI: 0.259 to 1.600; no disability:  $\beta=0.288$ , 95% CI: 0.153 to 1.211) caregivers served was  
52  
53 also associated with self-efficacy scores significantly.  
54  
55  
56  
57

58  
59 A moderate association<sup>31</sup> between knowledge and attitude scores ( $r=0.233$ ,  $p<0.05$ ) and between  
60

attitude and self-efficacy scores ( $r=0.150$ ,  $p<0.05$ ) was tested by Pearson correlation calculations.

The correlation coefficient between knowledge and self-efficacy was not statistically significant

( $r=0.034$ ,  $p>0.05$ ).

Table 2 Factors associated with knowledge, attitude and self-efficacy: multivariable linear regression models

| Variables                     | FAQ 1 scores |                       |              | KAOP scores   |                         |              | Self-efficacy scores |                       |              |
|-------------------------------|--------------|-----------------------|--------------|---------------|-------------------------|--------------|----------------------|-----------------------|--------------|
|                               | $\beta$      | 95% CI                | $p$          | $\beta$       | 95% CI                  | $p$          | $B$                  | 95% CI                | $p$          |
| <b>Gender</b>                 |              |                       |              |               |                         |              |                      |                       |              |
| Male                          | Ref.         |                       |              | Ref.          |                         |              | Ref.                 |                       |              |
| Female                        | -0.081       | (-1.646, 0.176)       | 0.102        | <b>-0.110</b> | <b>(-1.751, -0.080)</b> | <b>0.022</b> | 0.010                | (-1.169, 1.813)       | 0.812        |
| <b>Age (years)</b>            |              |                       |              |               |                         |              |                      |                       |              |
| 30-39                         | Ref.         |                       |              | Ref.          |                         |              | Ref.                 |                       |              |
| 40-49                         | 0.109        | (-0.143, 1.345)       | 0.110        | -0.017        | (-4.448, 3.105)         | 0.792        | 0.085                | (-0.323, 2.013)       | 0.141        |
| ≥50                           | -0.011       | (-0.951, 0.619)       | 0.731        | -0.013        | (-5.362, 2.750)         | 0.534        | <b>0.215</b>         | <b>(0.139, 1.027)</b> | <b>0.003</b> |
| <b>Education level</b>        |              |                       |              |               |                         |              |                      |                       |              |
| Junior high school or below   | Ref.         |                       |              | Ref.          |                         |              | Ref.                 |                       |              |
| Secondary high school         | 0.100        | (-0.019, 1.391)       | 0.057        | 0.071         | (-1.207, 5.078)         | 0.160        | 0.014                | (-1.086, 1.331)       | 0.771        |
| Bachelor degree or above      | <b>0.212</b> | <b>(0.193, 0.824)</b> | <b>0.027</b> | -0.023        | (-4.021, 2.721)         | 0.740        | 0.031                | (-1.310, 1.611)       | 0.608        |
| <b>Working tenure (years)</b> |              |                       |              |               |                         |              |                      |                       |              |
| 1-3                           | Ref.         |                       |              | Ref.          |                         |              | Ref.                 |                       |              |
| 4-6                           | -0.006       | (-0.601, 0.520)       | 0.923        | 0.093         | (-0.379, 4.053)         | 0.061        | -0.079               | (-1.105, 0.129)       | 0.065        |
| ≥7                            | -0.051       | (-1.231, 0.441)       | 0.290        | <b>-0.130</b> | <b>(-1.527, -0.110)</b> | <b>0.044</b> | -0.058               | (-1.146, 0.378)       | 0.304        |
| <b>NH ownership</b>           |              |                       |              |               |                         |              |                      |                       |              |

|                                         |                     |              |                       |              |              |                       |                  |              |                       |                  |
|-----------------------------------------|---------------------|--------------|-----------------------|--------------|--------------|-----------------------|------------------|--------------|-----------------------|------------------|
|                                         | Public              | Ref.         |                       |              | Ref.         |                       |                  | Ref.         |                       |                  |
|                                         | Private             | 0.062        | (−0.317, 0.570)       | 0.413        | −0.041       | (−1.427, 1.127)       | 0.784            | 0.067        | (−0.408, 1.001)       | 0.202            |
| <b>Work place</b>                       |                     |              |                       |              |              |                       |                  |              |                       |                  |
|                                         | Urban               | Ref.         |                       |              | Ref.         |                       |                  | Ref.         |                       |                  |
|                                         | Rural               | 0.062        | (−0.065, 0.787)       | 0.186        | −0.032       | (−1.617, 1.211)       | 0.063            | −0.013       | (−0.873, 0.739)       | 0.706            |
| <b>Employment type</b>                  |                     |              |                       |              |              |                       |                  |              |                       |                  |
|                                         | Informal employee   | Ref.         |                       |              | Ref.         |                       |                  | Ref.         |                       |                  |
|                                         | Formal employee     | 0.119        | (−0.135, 1.050)       | 0.067        | <b>0.155</b> | <b>(0.116, 1.670)</b> | <b>0.011</b>     | 0.099        | (−1.013, 0.539)       | 0.089            |
| <b>Monthly income (¥)</b>               |                     |              |                       |              |              |                       |                  |              |                       |                  |
|                                         | <2000               | Ref.         |                       |              | Ref.         |                       |                  | Ref.         |                       |                  |
|                                         | 2000–3000           | 0.023        | (−0.361, 0.622)       | 0.684        | −0.004       | (−3.610, 2.578)       | 0.939            | 0.019        | (−1.040, 1.081)       | 0.736            |
|                                         | >3000               | 0.036        | (−0.742, 1.221)       | 0.218        | <b>0.214</b> | <b>(0.117, 1.461)</b> | <b>&lt;0.001</b> | −0.003       | (−1.930, 1.329)       | 0.906            |
| <b>Pre-job training</b>                 |                     |              |                       |              |              |                       |                  |              |                       |                  |
|                                         | No                  | Ref.         |                       |              | Ref.         |                       |                  | Ref.         |                       |                  |
|                                         | Yes                 | <b>0.193</b> | <b>(0.081, 1.169)</b> | <b>0.043</b> | 0.046        | (−1.311, 4.360)       | 0.315            | <b>0.143</b> | <b>(0.113, 1.024)</b> | <b>0.002</b>     |
| <b>Health status of elderly</b>         |                     |              |                       |              |              |                       |                  |              |                       |                  |
|                                         | Complete disability | Ref.         |                       |              | Ref.         |                       |                  | Ref.         |                       |                  |
|                                         | Partial disability  | 0.004        | (−1.002, 0.894)       | 0.917        | 0.114        | (−1.885, 8.457)       | 0.214            | <b>0.437</b> | <b>(0.259, 1.600)</b> | <b>&lt;0.001</b> |
|                                         | No disability       | 0.011        | (−1.069, 1.026)       | 0.410        | 0.084        | (−2.931, 7.759)       | 0.362            | <b>0.288</b> | <b>(0.153, 1.211)</b> | <b>0.001</b>     |
| <b>Interest in working with elderly</b> |                     |              |                       |              |              |                       |                  |              |                       |                  |
|                                         | No                  | Ref.         |                       |              | Ref.         |                       |                  | Ref.         |                       |                  |
|                                         | Yes                 | 0.080        | (−0.358, 1.230)       | 0.122        | <b>0.141</b> | <b>(0.088, 1.508)</b> | <b>0.039</b>     | <b>0.154</b> | <b>(0.114, 1.015)</b> | <b>0.012</b>     |

1  
2  
3  
4  
5  
6  
7  
8  
9  
10  
11  
12  
13  
14  
15  
16  
17  
18  
19  
20  
21  
22  
23  
24  
25  
26  
27  
28  
29  
30  
31  
32  
33  
34  
35  
36  
37  
38  
39  
40  
41  
42  
43  
44  
45  
46  
47  
48  
49  
50  
51  
52  
53  
54  
55  
56  
57  
58  
59  
60**Job satisfaction**

|                                | Not satisfied | Ref.                  |                  | Ref.  |                 | Ref.  |              |                       |              |
|--------------------------------|---------------|-----------------------|------------------|-------|-----------------|-------|--------------|-----------------------|--------------|
| Generally satisfied            | <b>0.345</b>  | <b>(0.223, 1.875)</b> | <b>&lt;0.001</b> | 0.079 | (-1.293, 3.108) | 0.323 | 0.052        | (-1.103, 2.469)       | 0.572        |
| Very satisfied                 | <b>0.322</b>  | <b>(0.210, 1.283)</b> | <b>&lt;0.001</b> | 0.098 | (-1.108, 3.275) | 0.388 | <b>0.177</b> | <b>(0.116, 1.223)</b> | <b>0.043</b> |
| <i>F</i>                       | 2.478         |                       | 0.001            | 2.744 |                 | 0.001 | 3.848        |                       | <0.001       |
| <i>R</i> <sup>2</sup>          | 0.118         |                       |                  | 0.122 |                 |       | 0.161        |                       |              |
| Adjusted <i>R</i> <sup>2</sup> | 0.105         |                       |                  | 0.109 |                 |       | 0.155        |                       |              |

**Note: Figures in bold letters/numbers indicate coefficients with statistical significance. 500 bootstrapping replications were used.**

**Discussion**

The rising of the elderly population has led to challenges for the Chinese government in meeting the increasing needs for professional healthcare for aged people. This study assessed the knowledge and attitude about the aging and self-efficacy of caregivers working in Chinese NHs. Low levels of knowledge, attitude and self-efficacy were observed in the present study compared with those in other countries or regions<sup>28 30 32</sup>. At the initial stage of NH development in China, severe shortage of qualified health workers and insufficient professional training resulted in difficulties of the majority of caregivers in providing healthcare services for the elderly<sup>3</sup>. Low income and negative expectation for career development also adversely influenced the work performance of caregivers<sup>33</sup>.

Consistent with other studies<sup>18 30 34</sup>, the present results found that caregivers who received higher level education and pre-job training gave higher scores for knowledge about the elderly. A possible reason is that long-term education not only improved the working ability of caregivers

1  
2  
3  
4 but can also teach additional knowledge and further correct their misunderstanding about aging.  
5

6 Despite association of knowledge scores with pre-job training was significant in our model, this  
7  
8 result could be not stable and needs further research. It may be due to the effect of short-term  
9  
10 training is not significant. In addition to the two factors, high job satisfaction level was also  
11  
12 associated with knowledge given that this driving force factor can encourage staff to learn  
13  
14 additional information relative to their work<sup>35</sup>.  
15  
16  
17

18  
19 With respect to attitude toward the elderly, this study indicated the females were more likely to  
20  
21 have negative attitude compared with males, inconsistent with other studies<sup>15 36</sup>. The potential  
22  
23 explanation is that women in Chinese traditional families take additional responsibilities in  
24  
25 cultivating children and taking care of old people; as such, female caregivers tend to develop poor  
26  
27 attitude. Additionally, gender discrimination in the workplace often results in unequal treatment  
28  
29 for females in terms of wages and career advancement<sup>37 38</sup>. Therefore, female caregivers tend to  
30  
31 have poor attitude. The negative association of work tenure with attitude can be explained by the  
32  
33 fact long-term work in the same position can result in burnout<sup>39</sup>, leading to negative emotion  
34  
35 toward work.  
36  
37  
38  
39  
40  
41

42  
43 Similar to other study<sup>40</sup>, caregivers employed as formal staff had positive attitude towards the  
44  
45 elderly than informal employees. This finding could be mainly due to the unequal salary system in  
46  
47 Chinese NHs. Considering that the wages of formal employees are paid by government revenues,  
48  
49 they often obtain more benefits (such as social insurances) than the others although they have the  
50  
51 same work load<sup>41</sup>. Therefore, a performance-based pay system can be considered to encourage  
52  
53 caregivers to develop a positive attitude. For example, old people's satisfaction with service can  
54  
55 be used as a performance evaluation indicator; an equal payment system for informal and formal  
56  
57  
58  
59  
60

1  
2  
3  
4 employee should be designed.  
5

6 Additionally, The KAOP scores increased with increasing income, reflecting the important role of  
7 economic factors in improving the work enthusiasm and performance of caregivers <sup>42</sup>. Although  
8 caregivers interested in working with the elderly tended to have positive attitude in this study, this  
9 result has an uncertainty possibly due to the fact that effects other factors (such as burnout, work  
10 stress) are not controlled<sup>43 44</sup>.  
11

12 In this study, the age of caregivers had a positive relationship to self-efficacy, consistent with  
13 previous results<sup>45</sup>. Old age often indicates an increase in life and work experiences and,  
14 accordingly, improved people's beliefs about their capabilities. Caregivers who received pre-job  
15 training are expected to possess improved work skills in handling workload and overcoming  
16 obstacles, thereby enhancing their self-perception on personal efficacy<sup>46</sup>. Therefore, professional  
17 training for aged care should be conducted to improve the knowledge and abilities of caregivers.  
18

19 The perceived health status of the elderly evaluated by caregivers is also responsible for the  
20 variations in self-efficacy scores. Providing services for the old adults without disability decreases  
21 difficulty for caregivers compared with caring for disabled ones <sup>47</sup>. Thus, this group of caregivers  
22 is more likely to perceive a high level of self-efficacy. Meanwhile, the positive association of  
23 self-efficacy with interest in working with old and job satisfaction indicated these factors can  
24 evoke enthusiastic attitude towards work, thereby improving self-confidence in coping with work  
25 difficulties.  
26

27 The positive correlations amongst knowledge, attitude and self-efficacy presented in this study  
28 agreed with "knowledge–attitude–practice" theory<sup>48 49</sup>. Knowing the correct knowledge about  
29 aging is beneficial for caregivers to develop an optimistic attitude toward elderly people<sup>48</sup>.  
30  
31  
32  
33  
34  
35  
36  
37  
38  
39  
40  
41  
42  
43  
44  
45  
46  
47  
48  
49  
50  
51  
52  
53  
54  
55  
56  
57  
58  
59  
60



1  
2  
3  
4 Accordingly, positive attitude is beneficial for improving people's beliefs about their  
5  
6 capabilities<sup>49</sup>. Therefore, these closed associations indicated that the effective workforce  
7  
8 management for caregivers should take knowledge, attitude and self-efficacy into account.  
9

### 10 11 **Limitation**

12  
13  
14 This study has several limitations. Firstly, the 403 samples from Liaoning province were limited to  
15  
16 reflect the comprehensive situation in China. This sample size also affected the width of 95% CI  
17  
18 in the regression models, although it is sufficient for data analysis. Caution needs to be taken when  
19  
20 generalising the findings. Secondly, exploratory variables mainly included demographics and  
21  
22 working environment characteristics of caregivers although the selection of these variables was  
23  
24 supported by previous studies and interviews. However, institutional-level factors potentially  
25  
26 influencing the perceptions of caregivers, such as number of employees and elderly in NHs, were  
27  
28 ignored because data are unavailable. As such, the  $R^2$  of the regression models was relatively low.  
29  
30 Therefore, further studies should cover factors at different levels. As the outcome measurement is  
31  
32 not on an interval scale, there may be concern about using linear regression in the main analyses.  
33  
34 However, we obtained similar results in a sensitivity analysis using logistic regression with a cut  
35  
36 point at the mean for each score, and so this provides some support for the approach used. Thirdly,  
37  
38 readers should be aware that participants may report what they believe the researcher wants to  
39  
40 know instead of the truth. Hence, the use of a self-reporting questionnaire could lead to idealised  
41  
42 responses to meet socially acceptable norms.  
43  
44  
45  
46  
47  
48  
49  
50  
51  
52  
53  
54

### 55 **Conclusion**

56  
57  
58 This study provides some insights on the knowledge, attitude about the elderly and self-efficacy of  
59  
60

1  
2  
3  
4 caregivers in Chinese NHs and identify their associated characteristics and work environment  
5  
6 factors.

7  
8  
9 Overall, caregivers working in Chinese NHs have a poor rating on knowledge about aging,  
10  
11 attitude toward the elderly and self-efficacy. Factors associated with these attributes mainly  
12  
13 include gender, age, educational level, income, working tenure, employment type, pre-job  
14  
15 training, health status of elderly, interest in working with elderly and job satisfaction.  
16  
17

### 18 19 **Ethics approval and consent to participate**

20  
21  
22 Our study was approved by the ethics committee of Jinzhou Medical University  
23  
24 (JMU00001078-15088)  
25

### 26 27 **Consent for publication**

28  
29  
30 Consent for publication was obtained from persons we investigated in this study.  
31

### 32 33 **Availability of data and material**

34  
35  
36 Data are available upon reasonable request  
37

### 38 39 **Competing interests**

40  
41  
42 The authors declare that they have no competing interests.  
43

### 44 45 **Funding**

46  
47  
48 This work was supported by Liaoning Provincial Social Science Project (NO.2019lslktyb-067)  
49

### 50 51 **Authors' contributions**

52  
53  
54 All authors made significant contributions to the study. HZ conceptualized this study and analysed  
55  
56 the data. Moreover, she wrote the first draft of the manuscript. HS interpreted the results and  
57  
58 revised the manuscript. The final version submitted for publication was read and approved by all  
59  
60 authors.

## Acknowledgements

The authors gratefully acknowledge all interviewees participating in this study.

## References

1. Wu M, Li SX, Zhang NJ, et al. Nursing home research in Jinan, China: a focus group approach. *International Journal of Public Policy* 2012;1(8):21-30.
2. Fua F, Lianga Y, Anb Y, et al. Self-efficacy and psychological well-being of nursing home residents in China: the mediating role of social engagement. *Asia Pacific Journal of Social Work and Development* 2018;28(2):128-40.
3. Song Y, Anderson RA, Corazzini KN, et al. Staff characteristics and care in Chinese nursing homes: A systematic literature review. *International Journal of Nursing Sciences* 2014;1(4):423-36.
4. Chan YK, Lee RPL. Network Size, Social Support and Happiness in Later Life: A Comparative Study of Beijing and Hong Kong. *Journal of Happiness Studies* 2006;7(1):87-112.
5. Wong YC, Leung J. Long-term care in China: issues and prospects. *J Gerontol Soc Work* 2012;55(7):570-86.
6. Zhan HJ. Population Aging and Long-Term Care in China. *Generations* 2013;37(1):53-58.
7. Hao Q, Wu S, Ying L, et al. Current dilemmas of nursing homes in Chengdu: a cross-sectional survey. *Journal of the American Medical Directors Association* 2012;13(4):406.e9-06.e12.
8. Feng Z, Liu C, Guan X, et al. China's Rapidly Aging Population Creates Policy Challenges

- 1  
2  
3  
4 In Shaping A Viable Long-Term Care System. *Health Affairs* 2012;31(12):2764-73.  
5  
6  
7 9. Zhang H. Who will care for our parents? Changing boundaries of family and public roles in  
8  
9 providing care for the aged in urban China. *Care Management Journals*  
10  
11 2007;8(1):1-10.  
12  
13  
14 10. Lee AC, Wong AK, Loh EK. Score in the Palmore's Aging Quiz, knowledge of community  
15  
16 resources and working preferences of undergraduate nursing students toward the  
17  
18 elderly in Hong Kong. *Nurse Educ Today* 2006;26(4):269-76.  
19  
20  
21  
22 11. Fagerberg I, Ekman S-L. Caring for elderly patients: a longitudinal study of Swedish  
23  
24 nursing students' narratives. *Health Care in Later Life* 1998(3):258-71.  
25  
26  
27 12. Kim O-N, Oh J-w, Kim Y-S, et al. Impacts of Perceived Health Status and Self-efficacy in  
28  
29 Hospital Nurses on their Health Promoting Behaviors. *Advances in information*  
30  
31 *Sciences and Service Sciences* 2014;6(11):139-44.  
32  
33  
34  
35 13. Bandura A. Perceived Self-Efficacy in Cognitive Development and Functioning 1993.  
36  
37  
38 14. Chris G. Stress, coping and burn-out in nursing students. *International Journal of Nursing*  
39  
40 *Studies* 2010;47(10):1299-309.  
41  
42  
43 15. Hweidi IM, Alhassan MA. Jordanian nurses' attitudes toward older patients in acute care  
44  
45 settings. *International Nursing Review* 2010;52(3):225-32.  
46  
47  
48 16. Gallagher S, Bennett KM, Halford JC. A comparison of acute and long-term health-care  
49  
50 personnel's attitudes towards older adults. *International Journal of Nursing Practice*  
51  
52 2010;12(5):273-79.  
53  
54  
55  
56 17. Jacelon CS. Attitudes and behaviors of hospital staff toward elders in an acute care  
57  
58 setting *Applied Nursing Research* 2002;15(4):227-34.  
59  
60

- 1  
2  
3  
4 18. Yenişehir S, Karakaya MG. Knowledge and practice of nursing home caregivers about  
5  
6 urinary incontinence. *European Geriatric Medicine* 2019;10(1):99-105.  
7  
8  
9  
10 19. Network CY. The growth rate of the elderly population in Liaoning Province slowed down  
11  
12 in 2017, and the population of young and old people increased rapidly. 2017  
13  
14 [Available  
15  
16 from:[https://sh.qihoo.com/9715f9adce7664579?cota=1&refer\\_scene=so\\_1&sign=360](https://sh.qihoo.com/9715f9adce7664579?cota=1&refer_scene=so_1&sign=360_e39369d1)  
17  
18 [e39369d1](https://sh.qihoo.com/9715f9adce7664579?cota=1&refer_scene=so_1&sign=360_e39369d1).  
19  
20  
21  
22 20. P Peduzzi , J Concato , Feinstein A. Importance of events per independent variable in  
23  
24 proportional hazards regression analysis. II. Accuracy and precision of regression  
25  
26 estimates. *Journal of Clinical Epidemiology* 2007;30(4):618-26.  
27  
28  
29  
30 21. Peduzzi, Peter Concato, Kemper J. A Simulation Study of the Number of Events per  
31  
32 Variable in Logistic Regression Analysis. *Journal of Clinical Epidemiology*  
33  
34 1996;49(12):1373-9.  
35  
36  
37  
38 22. Kane RL. Ageism: Negative and Positive 2nd Edition. *Journal of Public Health Policy*  
39  
40 2000;21(2):247-49.  
41  
42  
43 23. Wang CC, Liao WP, Yuan SC, et al. The Chinese version of the Facts on Aging Quiz  
44  
45 scale: reliability and validity assessment. *International Journal of Nursing Studies*  
46  
47 2010;47(6):742-52.  
48  
49  
50  
51 24. Wang CC, Liao WC, Kao MC, et al. Taiwanese medical and nursing student interest  
52  
53 levels in and attitudes towards geriatrics. *Annals of the Academy of Medicine*  
54  
55 *Singapore* 2009;38(3):230.  
56  
57  
58  
59 25. Yen CH, Liao WC, Chen YR, et al. A Chinese version of Kogan's Attitude Toward Older  
60

- 1  
2  
3  
4 People Scale: reliability and validity assessment. *International Journal of Nursing*  
5  
6  
7 *Studies* 2009;46(1):38-44.  
8
- 9 26. Schwarzer R, Bäßler J, Kwiatek P, et al. The assessment of optimistic self-beliefs:  
10  
11 Comparison of the German, Spanish, and Chinese versions of the General  
12  
13 Self-efficacy Scale. *Applied Psychology* 2010;46(1):69-88.  
14  
15
- 16 27. Fang LC. Informal employment and gender implications in China: the nature of work and  
17  
18 employment relations in the community services sector. *International Journal of*  
19  
20 *Human Resource Management* 2006;17(8):1471-87.  
21  
22  
23
- 24 28. Doherty M, Mitchell EA, O'Neill S. Attitudes of Healthcare Workers towards Older People  
25  
26 in a Rural Population: A Survey Using the Kogan Scale. *Nursing Research & Practice*  
27  
28 2011;2011(1):352627.  
29  
30  
31
- 32 29. Hu SH, Yu YM, Chang WY, et al. Social support and factors associated with self-efficacy  
33  
34 among acute-care nurse practitioners. *Journal of Clinical Nursing* 2017;27(2):876-82.  
35  
36  
37
- 38 30. Lambrinou E, Sourtzi P, Kalokerinou A, et al. Attitudes and knowledge of the Greek  
39  
40 nursing students towards older people. *Nurse Educ Today* 2009;29(6):617-22.  
41  
42
- 43 31. Benesty J, Chen J, Huang Y, et al. Pearson Correlation Coefficient. In: Cohen I, Huang Y,  
44  
45 Chen J, et al., eds. *Noise Reduction in Speech Processing*. Berlin, Heidelberg:  
46  
47 Springer Berlin Heidelberg 2009:1-4.  
48  
49
- 50 32. Tierney AJ, Lewis SJ, Vallis J. Nurses' knowledge and attitudes towards older patients  
51  
52 admitted to acute orthopaedic wards. *Journal of Orthopaedic Nursing*  
53  
54 1998;2(2):67-75.  
55  
56  
57
- 58 33. Gaugler JE, Mittelman MS, Hepburn K, et al. Predictors of change in caregiver burden  
59  
60

- 1  
2  
3  
4 and depressive symptoms following nursing home admission. *Psychol Aging*  
5  
6 2009;24(2):385-96.  
7  
8  
9 34. Scerri A, Scerri C. Nursing students' knowledge and attitudes towards dementia — A  
10  
11 questionnaire survey. *Nurse Education Today* 2013;33(9):962-68.  
12  
13  
14 35. Humphris GM, Turner A. Job satisfaction and attitudes of nursing staff on a unit for the  
15  
16 elderly severely mentally infirm, with change of location. *Journal of Advanced Nursing*  
17  
18 1989;14(4):298.  
19  
20  
21  
22 36. Sung KT. Respect for Elders: Myths and Realities in East Asia. *Journal of Aging & Identity*  
23  
24 2000;5(4):197-205.  
25  
26  
27 37. Zhou X, Zhang J, Song X. Gender Discrimination in Hiring: Evidence from 19,130  
28  
29 Resumes in China. *Mpra Paper* 2013  
30  
31  
32 38. Shaffer MA, Joplin JRW, Bell MP, et al. Gender Discrimination and Job-Related  
33  
34 Outcomes: A Cross-Cultural Comparison of Working Women in the United States and  
35  
36 China ☆☆☆. *Journal of Vocational Behavior* 2000;57(3):395-427.  
37  
38  
39  
40 39. Lamb HR. Staff burnout in work with long-term patients. *Hospital & Community Psychiatry*  
41  
42 1979;30(6):396-8.  
43  
44  
45 40. P S. Interactions of nurses with elderly patients: relationship to nurses' attitudes and to  
46  
47 formal activity periods. *Journal of Advanced Nursing* 2010;18(1):14-19.  
48  
49  
50 41. Zuo H. Formal and Informal Employment in China: Probability of Employment and  
51  
52 Determinants of Monthly Wages. *Australian Economic Review* 2013;46(4):405-23.  
53  
54  
55 42. Idrees Z, Xinping X, Shafi K, et al. Effect of salary, training and motivation on job  
56  
57 performance of employees. *American Journal of Business, Economics and*  
58  
59  
60

- 1  
2  
3  
4 *Management* 2015;3(2):55-58.
- 5  
6  
7 43. Undergraduate Nursing Students and the Elderly: an Assessment of Attitudes in a Turkish  
8  
9 University. Apha Meeting and Exposition; 2017.
- 10  
11  
12 44. Monnot MJ, Beehr TA. Subjective well-being at work: Disentangling source effects of  
13  
14 stress and support on enthusiasm, contentment, and meaningfulness. *Journal of*  
15  
16 *Vocational Behavior* 2014;85(2):204-18.
- 17  
18  
19 45. Li J, He Z, Luo Y, et al. Perceived Transcultural Self-Efficacy of Nurses in General  
20  
21 Hospitals in Guangzhou, China. *Nursing Research* 2016;65(5):371-79.
- 22  
23  
24 46. Hendrix CC, Landerman R, Abernethy AP. Effects of an individualized caregiver training  
25  
26 intervention on self-efficacy of cancer caregivers. *West J Nurs Res*  
27  
28 2013;35(5):590-610.
- 29  
30  
31 47. Uysal A, Albayrak B, Koçulu B, et al. Attitudes of nursing students toward people with  
32  
33 disabilities. *Nurse Educ Today* 2014;34(5):878-84.
- 34  
35  
36 48. Howell D, Butler L, Vincent L, et al. Influencing nurses' knowledge, attitudes, and practice  
37  
38 in cancer pain management. *Cancer Nursing* 2000;23(1):55.
- 39  
40  
41 49. Pan HH, Shih HL, Wu LF, et al. Path modeling of knowledge, attitude and practice toward  
42  
43 palliative care consultation service among Taiwanese nursing staff: a cross-sectional  
44  
45 study. *Bmc Palliative Care* 2017;16(1):42.
- 46  
47  
48  
49  
50  
51  
52  
53  
54  
55  
56  
57

58 **Figure1 legend:** The process for sample screening: 800 samples were filtered to 403  
59  
60





Figure 1 The process for sample screening

## Supplementary Table

Logistic regression models were established for sensitivity test by recoding the knowledge, attitude and self-efficacy scores into dichotomous variables (using average values as a cut-off point: encoding 1 for those greater than the mean, otherwise 0). Table 1 showed factors associated with knowledge, attitude and self-efficacy are same as the results from multivariable linear regression analyses.

Table 1 Results from logistic regression models

| Variables                    | FAQ 1 scores |                       |              | KAOP scores  |                       |              | Self-efficacy scores |                       |              |
|------------------------------|--------------|-----------------------|--------------|--------------|-----------------------|--------------|----------------------|-----------------------|--------------|
|                              | OR           | 95%CI                 | p            | OR           | 95%CI                 | p            | OR                   | 95%CI                 | p            |
| <b>Gender</b>                |              |                       |              |              |                       |              |                      |                       |              |
| Male                         | Ref.         |                       |              | Ref.         |                       |              | Ref.                 |                       |              |
| Female                       | 0.489        | (0.239, 1.004)        | 0.051        | <b>0.839</b> | <b>(0.042, 0.938)</b> | <b>0.023</b> | 1.191                | (0.579, 2.447)        | 0.635        |
| <b>Age(years)</b>            |              |                       |              |              |                       |              |                      |                       |              |
| 30-39                        | Ref.         |                       |              | Ref.         |                       |              | Ref.                 |                       |              |
| 40-49                        | 1.626        | (0.919, 2.877)        | 0.095        | 0.990        | (0.559, 1.754)        | 0.973        | 1.260                | (0.702, 2.262)        | 0.439        |
| 50≤                          | 0.840        | (0.547, 1.543)        | 0.573        | 1.221        | (0.666, 2.241)        | 0.518        | <b>1.810</b>         | <b>(1.069, 3.378)</b> | <b>0.003</b> |
| <b>Education level</b>       |              |                       |              |              |                       |              |                      |                       |              |
| Junior high school or below  | Ref.         |                       |              | Ref.         |                       |              | Ref.                 |                       |              |
| Secondary high school        | 0.917        | (0.471, 1.784)        | 0.799        | 1.013        | (0.589, 1.742)        | 0.963        | 0.894                | (0.511, 1.562)        | 0.693        |
| Bachelor degree or above     | <b>1.751</b> | <b>(1.009, 3.038)</b> | <b>0.046</b> | 0.889        | (0.459, 1.723)        | 0.728        | 1.143                | (0.585, 2.235)        | 0.696        |
| <b>Working tenure(years)</b> |              |                       |              |              |                       |              |                      |                       |              |
| 1-3                          | Ref.         |                       |              | Ref.         |                       |              | Ref.                 |                       |              |
| 4-6                          | 0.841        | (0.519, 1.363)        | 0.843        | 1.600        | (0.876, 2.925)        | 0.126        | 0.719                | (0.436, 1.184)        | 0.195        |
| 7≤                           | 0.662        | (0.339, 1.142)        | 0.125        | <b>0.628</b> | <b>(0.006, 0.835)</b> | <b>0.047</b> | 0.686                | (0.369, 1.276)        | 0.234        |
| <b>Ownership of NHs</b>      |              |                       |              |              |                       |              |                      |                       |              |
| Public                       | Ref.         |                       |              | Ref.         |                       |              | Ref.                 |                       |              |
| Private                      | 0.899        | (0.568, 1.423)        | 0.650        | 1.145        | (0.725, 1.808)        | 0.561        | 1.246                | (0.780, 1.989)        | 0.358        |
| <b>Work place</b>            |              |                       |              |              |                       |              |                      |                       |              |
| Urban                        | Ref.         |                       |              | Ref.         |                       |              | Ref.                 |                       |              |
| Rural                        | 1.130        | (0.729, 1.751)        | 0.584        | 0.899        | (0.582, 1.388)        | 0.630        | 0.891                | (0.569, 1.395)        | 0.613        |
| <b>Employment type</b>       |              |                       |              |              |                       |              |                      |                       |              |
| Informal employee            | Ref.         |                       |              | Ref.         |                       |              | Ref.                 |                       |              |
| Formal employee              | 1.130        | (0.729, 1.751)        | 0.869        | <b>1.694</b> | <b>(1.352, 2.887)</b> | <b>0.011</b> | 0.910                | (0.468, 1.773)        | 0.783        |
| <b>Monthly income (¥)</b>    |              |                       |              |              |                       |              |                      |                       |              |
| < 2000                       | Ref.         |                       |              | Ref.         |                       |              | Ref.                 |                       |              |
| 2000-3000                    | 1.100        | (0.688, 1.758)        | 0.691        | 0.758        | (0.477, 1.204)        | 0.241        | 1.052                | (0.650, 1.702)        | 0.838        |
| > 3000                       | 1.133        | (0.441, 1.986)        | 0.862        | <b>3.021</b> | <b>(1.330, 6.862)</b> | <b>0.008</b> | 1.163                | (0.540, 2.503)        | 0.700        |

**Pre-job training**

|     |              |                       |              |  |       |                |       |              |                       |                  |
|-----|--------------|-----------------------|--------------|--|-------|----------------|-------|--------------|-----------------------|------------------|
| No  | Ref.         |                       |              |  | Ref.  |                |       | Ref.         |                       |                  |
| Yes | <b>1.421</b> | <b>(1.065, 2.336)</b> | <b>0.043</b> |  | 1.022 | (0.626, 1.669) | 0.931 | <b>2.616</b> | <b>(1.548, 4.421)</b> | <b>&lt;0.001</b> |

**The health status of the elderly**

|                     |       |                |       |  |       |                |       |              |                       |              |
|---------------------|-------|----------------|-------|--|-------|----------------|-------|--------------|-----------------------|--------------|
| Complete disability | Ref.  |                |       |  | Ref.  |                |       | Ref.         |                       |              |
| Partial disability  | 1.226 | (0.337, 1.566) | 0.415 |  | 1.440 | (0.665, 3.118) | 0.354 | <b>1.225</b> | <b>(1.097, 2.700)</b> | <b>0.001</b> |
| No disability       | 1.151 | (0.339, 1.665) | 0.481 |  | 1.301 | (0.586, 2.889) | 0.581 | <b>1.330</b> | <b>(1.139, 2.798)</b> | <b>0.012</b> |

**Interest in working with the aged**

|     |       |                |       |  |              |                       |              |              |                       |              |
|-----|-------|----------------|-------|--|--------------|-----------------------|--------------|--------------|-----------------------|--------------|
| No  | Ref.  |                |       |  | Ref.         |                       |              | Ref.         |                       |              |
| Yes | 1.307 | (0.707, 2.418) | 0.393 |  | <b>2.069</b> | <b>(1.105, 3.873)</b> | <b>0.023</b> | <b>1.381</b> | <b>(1.021, 2.646)</b> | <b>0.030</b> |

**Job Satisfaction**

|                     |              |                       |              |  |        |                |       |              |                       |              |
|---------------------|--------------|-----------------------|--------------|--|--------|----------------|-------|--------------|-----------------------|--------------|
| Not satisfied       | Ref.         |                       |              |  | Ref.   |                |       | Ref.         |                       |              |
| Generally satisfied | <b>2.481</b> | <b>(1.053, 5.846)</b> | <b>0.038</b> |  | 1.878  | (0.804, 4.384) | 0.145 | 1.439        | (0.576, 3.592)        | 0.435        |
| Very satisfied      | <b>2.137</b> | <b>(1.915, 4.991)</b> | <b>0.035</b> |  | 1.668  | (0.719, 3.871) | 0.234 | <b>1.905</b> | <b>(1.072, 4.699)</b> | <b>0.041</b> |
| $\chi^2$            | 35.118       |                       | 0.014        |  | 33.362 |                | 0.015 | 46.818       |                       | <0.001       |
| $R^2$               | 0.111        |                       |              |  | 0.106  |                |       | 0.147        |                       |              |

Note: Figures in bold indicate coefficients with statistical significance

### Supplementary Figure

We used plots of residuals against the covariates to observe fit of the regression models. From following figures, most points ranged from -2 to 2 and were generally distributed around 0, which indicates the modes have an acceptable fitness.

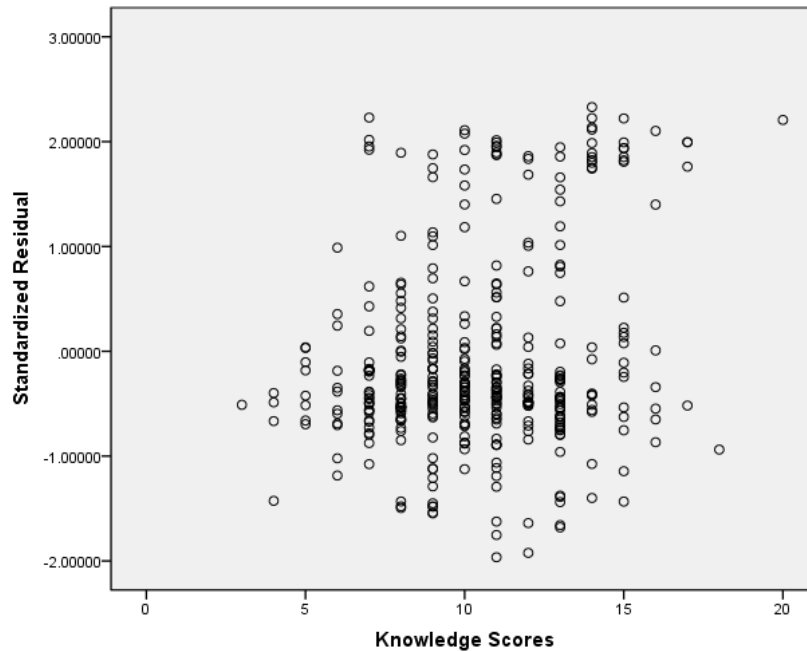

Figure 1 Scatter plot for knowledge scores and their standardized residuals

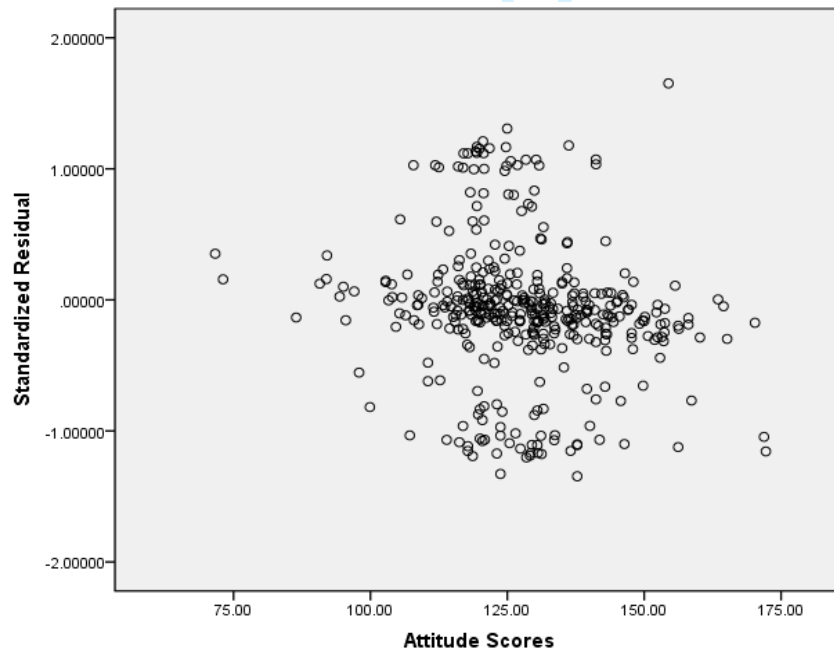

Figure 2 Scatter plot for attitude scores and their standardized residuals

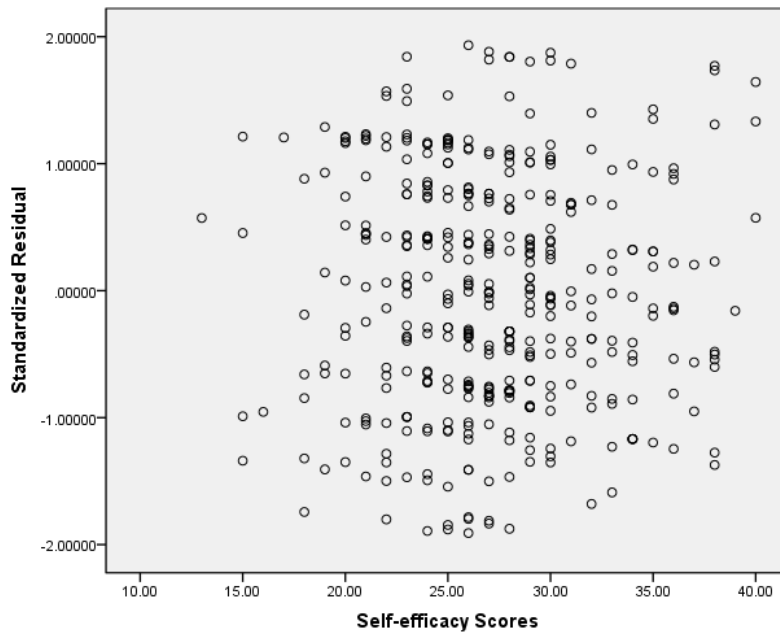

**Figure 3** Scatter plot for self-efficacy scores and their standardized residuals

**STROBE 2007 (v4) Statement—Checklist of items that should be included in reports of *cross-sectional studies***

| Section/Topic                | Item # | Recommendation                                                                                                                                                                       | Reported on page # |
|------------------------------|--------|--------------------------------------------------------------------------------------------------------------------------------------------------------------------------------------|--------------------|
| <b>Title and abstract</b>    | 1      | (a) Indicate the study’s design with a commonly used term in the title or the abstract                                                                                               | Page1              |
|                              |        | (b) Provide in the abstract an informative and balanced summary of what was done and what was found                                                                                  | Page2-3            |
| <b>Introduction</b>          |        |                                                                                                                                                                                      |                    |
| Background/rationale         | 2      | Explain the scientific background and rationale for the investigation being reported                                                                                                 | Page4-5            |
| Objectives                   | 3      | State specific objectives, including any prespecified hypotheses                                                                                                                     | Page5              |
| <b>Methods</b>               |        |                                                                                                                                                                                      |                    |
| Study design                 | 4      | Present key elements of study design early in the paper                                                                                                                              | Page5-6            |
| Setting                      | 5      | Describe the setting, locations, and relevant dates, including periods of recruitment, exposure, follow-up, and data collection                                                      | Page6              |
| Participants                 | 6      | (a) Give the eligibility criteria, and the sources and methods of selection of participants                                                                                          | Page6              |
| Variables                    | 7      | Clearly define all outcomes, exposures, predictors, potential confounders, and effect modifiers. Give diagnostic criteria, if applicable                                             | Page7              |
| Data sources/<br>measurement | 8*     | For each variable of interest, give sources of data and details of methods of assessment (measurement). Describe comparability of assessment methods if there is more than one group | Page7              |
| Bias                         | 9      | Describe any efforts to address potential sources of bias                                                                                                                            | Page6              |
| Study size                   | 10     | Explain how the study size was arrived at                                                                                                                                            | Page6              |
| Quantitative variables       | 11     | Explain how quantitative variables were handled in the analyses. If applicable, describe which groupings were chosen and why                                                         | Page7-8            |
| Statistical methods          | 12     | (a) Describe all statistical methods, including those used to control for confounding                                                                                                | Page8              |
|                              |        | (b) Describe any methods used to examine subgroups and interactions                                                                                                                  | Page8              |
|                              |        | (c) Explain how missing data were addressed                                                                                                                                          | Page6              |
|                              |        | (d) If applicable, describe analytical methods taking account of sampling strategy                                                                                                   | Not applicable     |
|                              |        | (e) Describe any sensitivity analyses                                                                                                                                                | Not applicable     |
| <b>Results</b>               |        |                                                                                                                                                                                      |                    |

|                          |     |                                                                                                                                                                                                              |                |
|--------------------------|-----|--------------------------------------------------------------------------------------------------------------------------------------------------------------------------------------------------------------|----------------|
| Participants             | 13* | (a) Report numbers of individuals at each stage of study—eg numbers potentially eligible, examined for eligibility, confirmed eligible, included in the study, completing follow-up, and analysed            | Page9-11       |
|                          |     | (b) Give reasons for non-participation at each stage                                                                                                                                                         | Not applicable |
|                          |     | (c) Consider use of a flow diagram                                                                                                                                                                           | Not applicable |
| Descriptive data         | 14* | (a) Give characteristics of study participants (eg demographic, clinical, social) and information on exposures and potential confounders                                                                     | Page9-11       |
|                          |     | (b) Indicate number of participants with missing data for each variable of interest                                                                                                                          | Not applicable |
| Outcome data             | 15* | Report numbers of outcome events or summary measures                                                                                                                                                         | Page9          |
| Main results             | 16  | (a) Give unadjusted estimates and, if applicable, confounder-adjusted estimates and their precision (eg, 95% confidence interval). Make clear which confounders were adjusted for and why they were included | Page 12-15     |
|                          |     | (b) Report category boundaries when continuous variables were categorized                                                                                                                                    | Not applicable |
|                          |     | (c) If relevant, consider translating estimates of relative risk into absolute risk for a meaningful time period                                                                                             | Not applicable |
| Other analyses           | 17  | Report other analyses done—eg analyses of subgroups and interactions, and sensitivity analyses                                                                                                               | Not applicable |
| <b>Discussion</b>        |     |                                                                                                                                                                                                              |                |
| Key results              | 18  | Summarise key results with reference to study objectives                                                                                                                                                     | Page15         |
| Limitations              | 19  | Discuss limitations of the study, taking into account sources of potential bias or imprecision. Discuss both direction and magnitude of any potential bias                                                   | Page17         |
| Interpretation           | 20  | Give a cautious overall interpretation of results considering objectives, limitations, multiplicity of analyses, results from similar studies, and other relevant evidence                                   | Page15-17      |
| Generalisability         | 21  | Discuss the generalisability (external validity) of the study results                                                                                                                                        | Page 18        |
| <b>Other information</b> |     |                                                                                                                                                                                                              |                |
| Funding                  | 22  | Give the source of funding and the role of the funders for the present study and, if applicable, for the original study on which the present article is based                                                | Page19         |

\*Give information separately for cases and controls in case-control studies and, if applicable, for exposed and unexposed groups in cohort and cross-sectional studies.

**Note:** An Explanation and Elaboration article discusses each checklist item and gives methodological background and published examples of transparent reporting. The STROBE checklist is best used in conjunction with this article (freely available on the Web sites of PLoS Medicine at <http://www.plosmedicine.org/>, Annals of Internal Medicine at <http://www.annals.org/>, and Epidemiology at <http://www.epidem.com/>). Information on the STROBE Initiative is available at [www.strobe-statement.org](http://www.strobe-statement.org).
