# Supplementary material for: Knowledge, attitude and self-efficacy of elderly caregivers in Chinese nursing homes: a cross-sectional study in Liaoning Province
Source: PubMed Central journal article supplement — BMJ Open. 2019 Nov 12;9(11):e029869. doi: 10.1136/bmjopen-2019-029869 (PMC6858227; doi:10.1136/bmjopen-2019-029869), 2019-11-12
Supplement: bmjopen-2019-029869supp001.pdf [file bmjopen-2019-029869supp001.pdf]

### Supplementary Figure

We used plots of residuals against the covariates to observe fit of the regression models. From following figures, most points ranged from -2 to 2 and were generally distributed around 0, which indicates the modes have an acceptable fitness.

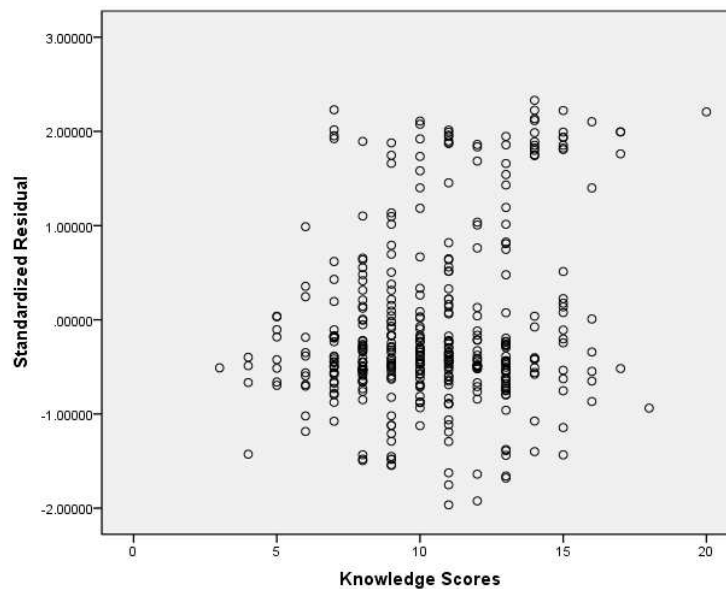

**Figure 1** Scatter plot for knowledge scores and their standardized residuals

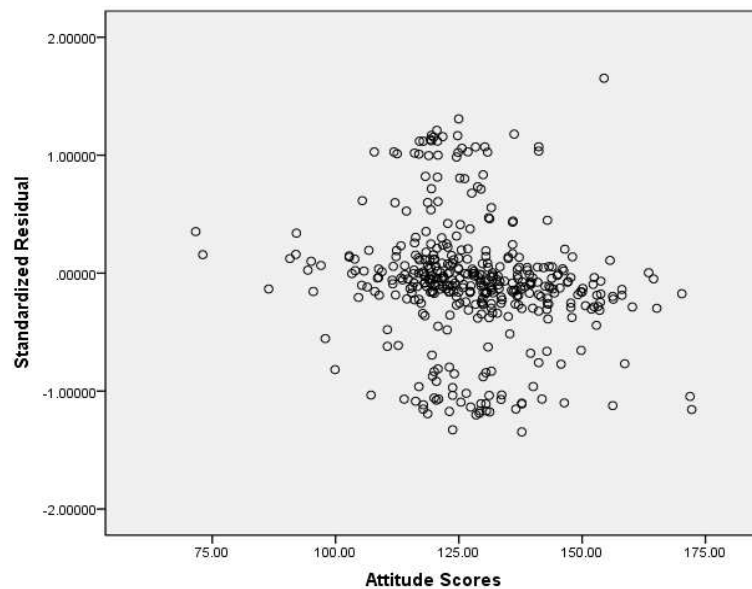

**Figure 2** Scatter plot for attitude scores and their standardized residuals

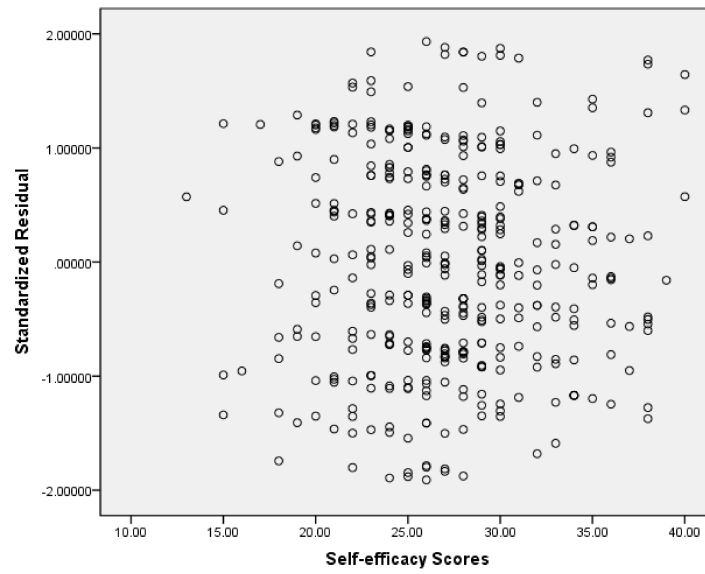

**Figure 3** Scatter plot for self-efficacy scores and their standardized residuals
