# Supplementary material for: Knowledge, attitude and self-efficacy of elderly caregivers in Chinese nursing homes: a cross-sectional study in Liaoning Province
Source: PubMed Central journal article supplement — BMJ Open. 2019 Nov 12;9(11):e029869. doi: 10.1136/bmjopen-2019-029869 (PMC6858227; doi:10.1136/bmjopen-2019-029869), 2019-11-12
Supplement: bmjopen-2019-029869supp002.pdf [file bmjopen-2019-029869supp002.pdf]

## Supplementary Table

Logistic regression models were established for sensitivity test by recoding the knowledge, attitude and self-efficacy scores into dichotomous variables (using average values as a cut-off point: encoding 1 for those greater than the mean, otherwise 0). Table 1 showed factors associated with knowledge, attitude and self-efficacy are same as the results from multivariable linear regression analyses.

Table 1 Results from logistic regression models

| Variables                    | FAQ 1 scores |                       |              | KAOP scores  |                       |              | Self-efficacy scores |                       |              |
|------------------------------|--------------|-----------------------|--------------|--------------|-----------------------|--------------|----------------------|-----------------------|--------------|
|                              | OR           | 95%CI                 | p            | OR           | 95%CI                 | p            | OR                   | 95%CI                 | p            |
| <b>Gender</b>                |              |                       |              |              |                       |              |                      |                       |              |
| Male                         | Ref.         |                       |              | Ref.         |                       |              | Ref.                 |                       |              |
| Female                       | 0.489        | (0.239, 1.004)        | 0.051        | <b>0.839</b> | <b>(0.042, 0.938)</b> | <b>0.023</b> | 1.191                | (0.579, 2.447)        | 0.635        |
| <b>Age(years)</b>            |              |                       |              |              |                       |              |                      |                       |              |
| 30-39                        | Ref.         |                       |              | Ref.         |                       |              | Ref.                 |                       |              |
| 40-49                        | 1.626        | (0.919, 2.877)        | 0.095        | 0.990        | (0.559, 1.754)        | 0.973        | 1.260                | (0.702, 2.262)        | 0.439        |
| 50≤                          | 0.840        | (0.547, 1.543)        | 0.573        | 1.221        | (0.666, 2.241)        | 0.518        | <b>1.810</b>         | <b>(1.069, 3.378)</b> | <b>0.003</b> |
| <b>Education level</b>       |              |                       |              |              |                       |              |                      |                       |              |
| Junior high school or below  | Ref.         |                       |              | Ref.         |                       |              | Ref.                 |                       |              |
| Secondary high school        | 0.917        | (0.471, 1.784)        | 0.799        | 1.013        | (0.589, 1.742)        | 0.963        | 0.894                | (0.511, 1.562)        | 0.693        |
| Bachelor degree or above     | <b>1.751</b> | <b>(1.009, 3.038)</b> | <b>0.046</b> | 0.889        | (0.459, 1.723)        | 0.728        | 1.143                | (0.585, 2.235)        | 0.696        |
| <b>Working tenure(years)</b> |              |                       |              |              |                       |              |                      |                       |              |
| 1-3                          | Ref.         |                       |              | Ref.         |                       |              | Ref.                 |                       |              |
| 4-6                          | 0.841        | (0.519, 1.363)        | 0.843        | 1.600        | (0.876, 2.925)        | 0.126        | 0.719                | (0.436, 1.184)        | 0.195        |
| 7≤                           | 0.662        | (0.339, 1.142)        | 0.125        | <b>0.628</b> | <b>(0.006, 0.835)</b> | <b>0.047</b> | 0.686                | (0.369, 1.276)        | 0.234        |
| <b>Ownership of NHs</b>      |              |                       |              |              |                       |              |                      |                       |              |
| Public                       | Ref.         |                       |              | Ref.         |                       |              | Ref.                 |                       |              |
| Private                      | 0.899        | (0.568, 1.423)        | 0.650        | 1.145        | (0.725, 1.808)        | 0.561        | 1.246                | (0.780, 1.989)        | 0.358        |
| <b>Work place</b>            |              |                       |              |              |                       |              |                      |                       |              |
| Urban                        | Ref.         |                       |              | Ref.         |                       |              | Ref.                 |                       |              |
| Rural                        | 1.130        | (0.729, 1.751)        | 0.584        | 0.899        | (0.582, 1.388)        | 0.630        | 0.891                | (0.569, 1.395)        | 0.613        |
| <b>Employment type</b>       |              |                       |              |              |                       |              |                      |                       |              |
| Informal employee            | Ref.         |                       |              | Ref.         |                       |              | Ref.                 |                       |              |
| Formal employee              | 1.130        | (0.729, 1.751)        | 0.869        | <b>1.694</b> | <b>(1.352, 2.887)</b> | <b>0.011</b> | 0.910                | (0.468, 1.773)        | 0.783        |
| <b>Monthly income (¥)</b>    |              |                       |              |              |                       |              |                      |                       |              |
| < 2000                       | Ref.         |                       |              | Ref.         |                       |              | Ref.                 |                       |              |
| 2000-3000                    | 1.100        | (0.688, 1.758)        | 0.691        | 0.758        | (0.477, 1.204)        | 0.241        | 1.052                | (0.650, 1.702)        | 0.838        |
| > 3000                       | 1.133        | (0.441, 1.986)        | 0.862        | <b>3.021</b> | <b>(1.330, 6.862)</b> | <b>0.008</b> | 1.163                | (0.540, 2.503)        | 0.700        |

|                                          |              |                       |              |              |                       |              |              |                       |                  |
|------------------------------------------|--------------|-----------------------|--------------|--------------|-----------------------|--------------|--------------|-----------------------|------------------|
| <b>Pre-job training</b>                  |              |                       |              |              |                       |              |              |                       |                  |
| No                                       | Ref.         |                       |              | Ref.         |                       |              | Ref.         |                       |                  |
| Yes                                      | <b>1.421</b> | <b>(1.065, 2.336)</b> | <b>0.043</b> | 1.022        | (0.626, 1.669)        | 0.931        | <b>2.616</b> | <b>(1.548, 4.421)</b> | <b>&lt;0.001</b> |
| <b>The health status of the elderly</b>  |              |                       |              |              |                       |              |              |                       |                  |
| Complete disability                      | Ref.         |                       |              | Ref.         |                       |              | Ref.         |                       |                  |
| Partial disability                       | 1.226        | (0.337, 1.566)        | 0.415        | 1.440        | (0.665, 3.118)        | 0.354        | <b>1.225</b> | <b>(1.097, 2.700)</b> | <b>0.001</b>     |
| No disability                            | 1.151        | (0.339, 1.665)        | 0.481        | 1.301        | (0.586, 2.889)        | 0.581        | <b>1.330</b> | <b>(1.139, 2.798)</b> | <b>0.012</b>     |
| <b>Interest in working with the aged</b> |              |                       |              |              |                       |              |              |                       |                  |
| No                                       | Ref.         |                       |              | Ref.         |                       |              | Ref.         |                       |                  |
| Yes                                      | 1.307        | (0.707, 2.418)        | 0.393        | <b>2.069</b> | <b>(1.105, 3.873)</b> | <b>0.023</b> | <b>1.381</b> | <b>(1.021, 2.646)</b> | <b>0.030</b>     |
| <b>Job Satisfaction</b>                  |              |                       |              |              |                       |              |              |                       |                  |
| Not satisfied                            | Ref.         |                       |              | Ref.         |                       |              | Ref.         |                       |                  |
| Generally satisfied                      | <b>2.481</b> | <b>(1.053, 5.846)</b> | <b>0.038</b> | 1.878        | (0.804, 4.384)        | 0.145        | 1.439        | (0.576, 3.592)        | 0.435            |
| Very satisfied                           | <b>2.137</b> | <b>(1.915, 4.991)</b> | <b>0.035</b> | 1.668        | (0.719, 3.871)        | 0.234        | <b>1.905</b> | <b>(1.072, 4.699)</b> | <b>0.041</b>     |
| $\chi^2$                                 | 35.118       |                       | 0.014        | 33.362       |                       | 0.015        | 46.818       |                       | <0.001           |
| $R^2$                                    | 0.111        |                       |              | 0.106        |                       |              | 0.147        |                       |                  |

**Note: Figures in bold indicate coefficients with statistical significance**
